# Supplementary material for: C3-Arylation of indoles with aryl ketones via C–C/C–H activations
Source: Royal Society of Chemistry journal article supplement (doi:10.1039/d1cc03954g), 2021-01-01

## Supporting Information

### C3-Arylation of Indoles with Aryl Ketones

#### via C-C/C-H Activations

Zi-Qiong Guo, Hui Xu, Xing Wang, Zhen-Yu Wang, Han-Yuan Li, Biao Ma, Hui-Xiong Dai\*

### Contents

|                                                                          |     |
|--------------------------------------------------------------------------|-----|
| 1. General information .....                                             | S2  |
| 2. Optimization of the Reaction Conditions.....                          | S2  |
| 3. Experimental Procedures .....                                         | S6  |
| 3.1 Typical procedure for preparation of ketoxime esters.....            | S6  |
| 3.2 Typical procedure for preparation of <b>3</b> .....                  | S6  |
| 3.3 Scalable synthesis .....                                             | S6  |
| 4. Mechanism Experiments.....                                            | S7  |
| 5. Analytical Data .....                                                 | S7  |
| 6. References.....                                                       | S25 |
| 7. <sup>1</sup> H, <sup>13</sup> C and <sup>19</sup> F NMR spectra ..... | S27 |

## 1. General information

Unless otherwise noted, all reactions were carried out under an N<sub>2</sub> atmosphere in sealed tube with magnetic stirring. All reagents were purchased from commercial suppliers with the highest purity grade, and used directly without further purification. <sup>1</sup>H NMR, <sup>13</sup>C NMR and <sup>19</sup>F NMR spectra were recorded on a Bruker 400 and 500 MHz spectrometer in CDCl<sub>3</sub>. The following abbreviations were used to explain multiplicities: s = singlet, d = doublet, t = triplet, q = quartet, m = multiplet, dd = double of doublets, td = triple doublet, dt = double triplet, tt = triple of triplets and br = broad. HRMS were recorded at the Center for Mass Spectrometry, Shanghai Institute of Material Medica. Solvents were purified prior to use according to conventional procedures. Reactions were monitored by thin layer chromatography (TLC) using silica gel plates. Column chromatography was performed on silica gel (200–300 mesh) using a mixture of petroleum ether-ethyl acetate as the eluent. The aryl ketones were commercially available or readily prepared according to the known method.<sup>1</sup>

## 2. Optimization of the Reaction Conditions

Table S1. Screening of the catalysts<sup>a</sup>

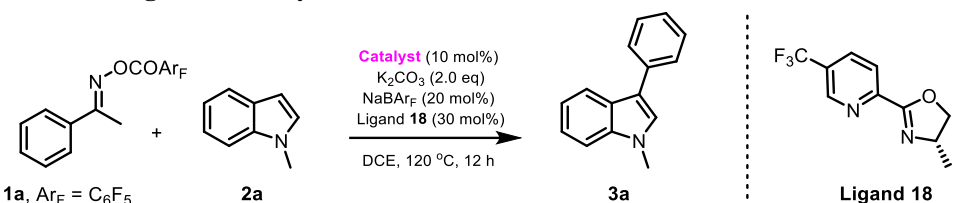

| Entry | Catalysts                                             | Yield (%) |
|-------|-------------------------------------------------------|-----------|
| 1     | /                                                     | nd        |
| 2     | Pd(MeCN) <sub>2</sub> Cl <sub>2</sub>                 | 65        |
| 3     | Pd(dppf)Cl <sub>2</sub>                               | trace     |
| 4     | PdCl <sub>2</sub>                                     | 74        |
| 5     | Pd(cod)Cl <sub>2</sub>                                | 14        |
| 6     | Pd(OAc) <sub>2</sub>                                  | 48        |
| 7     | Pd(TFA) <sub>2</sub>                                  | 49        |
| 8     | Pd(acac) <sub>2</sub>                                 | trace     |
| 9     | Pd(MeCN) <sub>4</sub> (BF <sub>4</sub> ) <sub>2</sub> | 30        |
| 10    | Pd <sub>2</sub> dba <sub>3</sub>                      | 26        |
| 11    | Pd(PPh <sub>3</sub> ) <sub>4</sub>                    | nd        |

<sup>a</sup>Reaction conditions: **1a** (0.11 mmol), **2a** (0.1 mmol), Catalyst (10 mol%), ligand **18** (30 mol%), NaBARF (20 mol%), K<sub>2</sub>CO<sub>3</sub> (0.2 mmol), DCE (2.0 mL), N<sub>2</sub>, 120 °C, 12 h. Yields were determined by <sup>1</sup>H NMR spectroscopy using CH<sub>2</sub>Br<sub>2</sub> as internal standard. NaBARF = Sodium tetrakis[3,5-bis(trifluoromethyl)phenyl] borate.

**Table S2. Screening of the bases<sup>a</sup>**

| Entry | Bases                           | Yield (%) |
|-------|---------------------------------|-----------|
| 1     | /                               | nd        |
| 2     | Na <sub>2</sub> CO <sub>3</sub> | 64        |
| 3     | NaHCO <sub>3</sub>              | 24        |
| 4     | K <sub>2</sub> CO <sub>3</sub>  | 74        |
| 5     | KHCO <sub>3</sub>               | 72        |
| 6     | Cs <sub>2</sub> CO <sub>3</sub> | nd        |
| 7     | Na <sub>3</sub> PO <sub>4</sub> | 60        |
| 8     | K <sub>3</sub> PO <sub>4</sub>  | 29        |
| 9     | NaOAc                           | 13        |
| 10    | KOAc                            | 13        |
| 11    | CF <sub>3</sub> COONa           | nd        |
| 12    | CF <sub>3</sub> COOK            | nd        |

<sup>a</sup>Reaction conditions: **1a** (0.11mmol), **2a** (0.1 mmol), PdCl<sub>2</sub> (10 mol%), ligand **18** (30 mol%), NaBAR<sub>F</sub> (20 mol%), Base (0.2 mmol), DCE (2.0 mL), N<sub>2</sub>, 120 °C, 12 h. Yields were determined by <sup>1</sup>H NMR spectroscopy using CH<sub>2</sub>Br<sub>2</sub> as internal standard.

**Table S3. Screening of the base loading<sup>a</sup>**

| Entry | K <sub>2</sub> CO <sub>3</sub> (n equiv.) | Yield (%) |
|-------|-------------------------------------------|-----------|
| 1     | 1.0                                       | 77        |
| 2     | 1.5                                       | 74        |
| 3     | 2.0                                       | 74        |
| 4     | 2.5                                       | 65        |
| 5     | 3.0                                       | 47        |

<sup>a</sup>Reaction conditions: **1a** (0.11mmol), **2a** (0.1 mmol), PdCl<sub>2</sub> (10 mol%), ligand **18** (30 mol%), NaBAR<sub>F</sub> (20 mol%), K<sub>2</sub>CO<sub>3</sub> (n eq), DCE (2.0 mL), N<sub>2</sub>, 120 °C, 12 h. Yields were determined by <sup>1</sup>H NMR spectroscopy using CH<sub>2</sub>Br<sub>2</sub> as internal standard.

**Table S4. Screening of the solvents<sup>a</sup>**
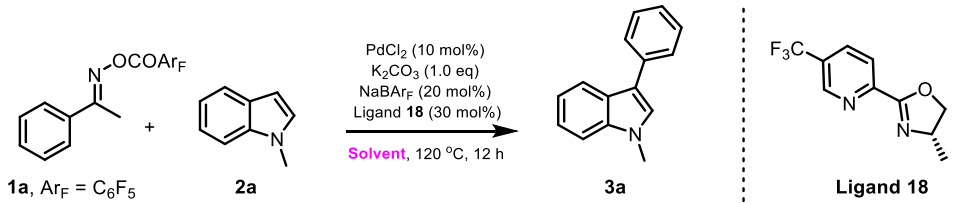

| Entry | Solvents           | Yield (%) |
|-------|--------------------|-----------|
| 1     | DCE                | 77        |
| 2     | DCM                | 35        |
| 3     | Toluene            | 43        |
| 4     | PhCF <sub>3</sub>  | 42        |
| 5     | CH <sub>3</sub> CN | nd        |
| 6     | 1, 4-dioxane       | nd        |
| 7     | THF                | nd        |
| 8     | MeOH               | nd        |
| 9     | DMF                | nd        |
| 10    | DMSO               | nd        |

<sup>a</sup>Reaction conditions: **1a** (0.11mmol), **2a** (0.1 mmol), PdCl<sub>2</sub> (10 mol%), ligand **18** (30 mol%), NaBAr<sub>F</sub> (20 mol%), K<sub>2</sub>CO<sub>3</sub> (0.1 mmol), Solvent (2.0 mL), N<sub>2</sub>, 120 °C, 12 h. Yields were determined by <sup>1</sup>H NMR spectroscopy using CH<sub>2</sub>Br<sub>2</sub> as internal standard.

**Table S5. Screening of the additives<sup>a</sup>**
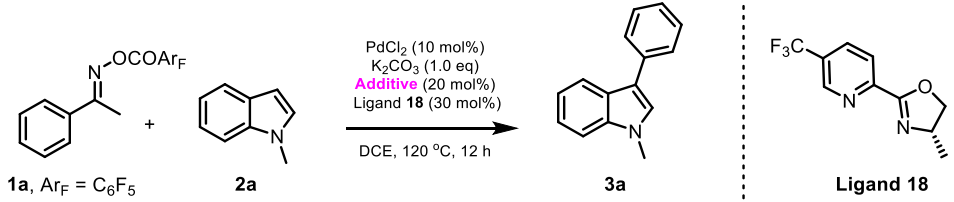

| Entry | Additives                       | Yield (%) |
|-------|---------------------------------|-----------|
| 1     | /                               | nd        |
| 2     | NaBAr <sub>F</sub>              | 77        |
| 3     | AgNTf <sub>2</sub>              | 20        |
| 4     | AgOTf                           | nd        |
| 5     | AgOAc                           | nd        |
| 6     | AgOTs                           | nd        |
| 7     | AgSbF <sub>6</sub>              | nd        |
| 8     | Ag <sub>2</sub> SO <sub>4</sub> | nd        |
| 9     | AgNO <sub>3</sub>               | nd        |
| 10    | AgBF <sub>4</sub>               | nd        |

<sup>a</sup>Reaction conditions: **1a** (0.11mmol), **2a** (0.1 mmol), PdCl<sub>2</sub> (10 mol%), ligand **18** (30 mol%), Additive (20 mol%), K<sub>2</sub>CO<sub>3</sub> (0.1 mmol), DCE (2.0 mL), N<sub>2</sub>, 120 °C, 12 h. Yields were determined by <sup>1</sup>H NMR spectroscopy using CH<sub>2</sub>Br<sub>2</sub> as internal standard.

**Table S6. Screening of the ligands<sup>a</sup>**

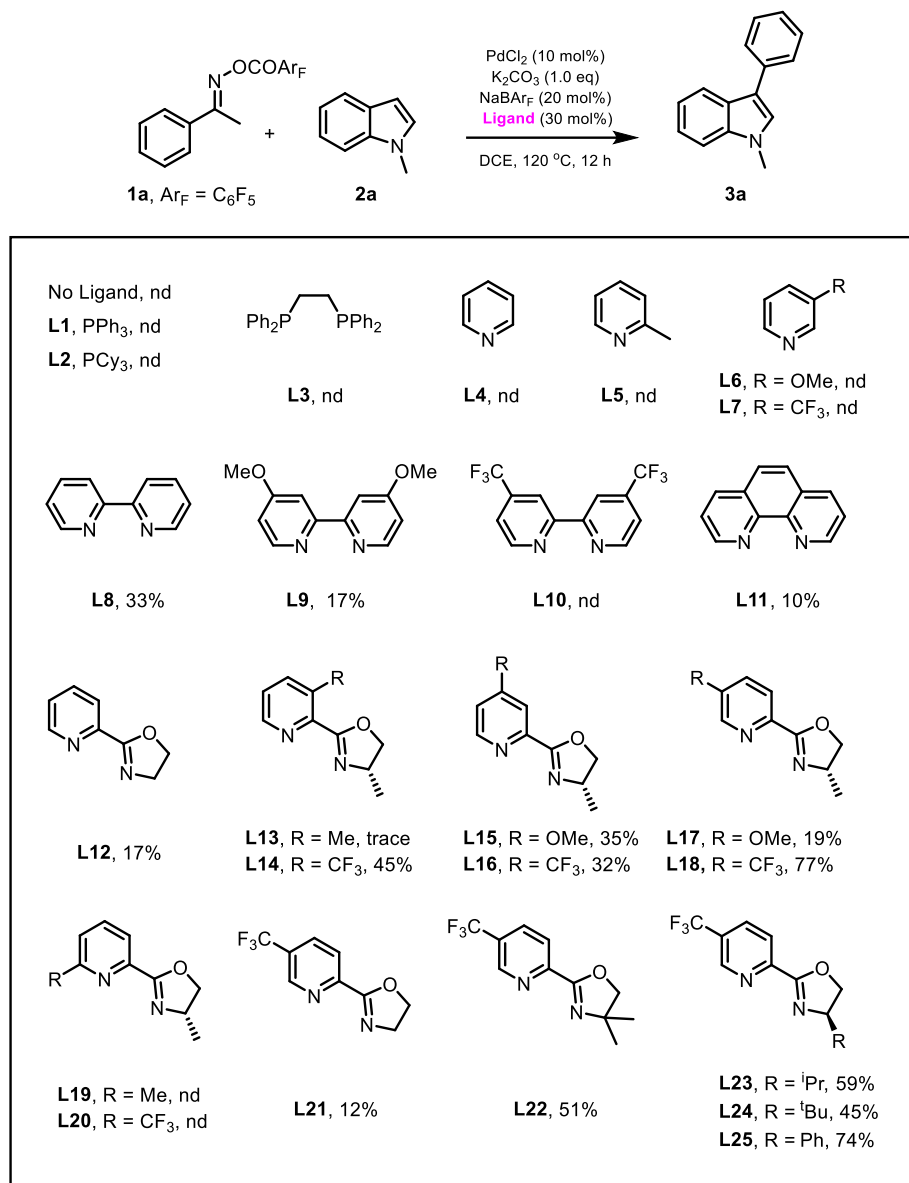

<sup>a</sup>Reaction conditions: **1a** (0.11mmol), **2a** (0.1 mmol), PdCl<sub>2</sub> (10 mol%), ligand (30 mol%), NaBArF (20 mol%), K<sub>2</sub>CO<sub>3</sub> (0.1 mmol), DCE (2.0 mL), N<sub>2</sub>, 120 °C, 12 h. Yields were determined by <sup>1</sup>H NMR spectroscopy using CH<sub>2</sub>Br<sub>2</sub> as internal standard.

### 3. Experimental Procedures

#### 3.1 Typical procedure for preparation of ketoxime esters<sup>2</sup>

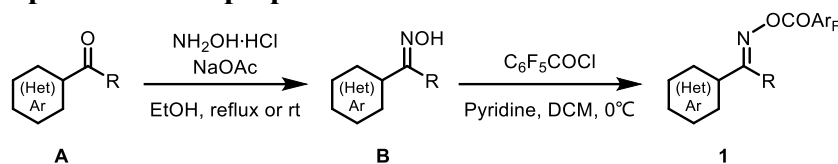

To a mixture of hydroxylamine hydrochloride (278 mg, 4 mmol), NaOAc (640 mg, 8 mmol), EtOH (10 mL) was added aryl ketone **A** (2 mmol), and the mixture was stirred at 90 °C for 2 h or at room temperature for overnight. The reaction mixture was cooled down to room temperature, and then EtOH was removed under reduced pressure. The resulting mixture was extracted with EtOAc. The organic layer was then washed with brine and dried over Na<sub>2</sub>SO<sub>4</sub>. The solvent was removed under vacuum to give oxime **B** (> 99% yield), not further purified.

To a mixture of oxime **B** (2 mmol) and CH<sub>2</sub>Cl<sub>2</sub> (10 mL) was slowly added pentafluorobenzoyl chloride (552 mg, 2.4 mmol), pyridine (221.2 mg, 2.8 mmol) at 0 °C. After a special time, aq. HCl (1.0 M) was added to the above solution, and the aqueous phase was discarded. The organic portion was washed with brine and dried over Na<sub>2</sub>SO<sub>4</sub>. The solvent was removed under reduced pressure and the residue was isolated by column chromatography (petroleum ether/ethyl acetate 20:1-5:1) or recrystallization to give starting material **1**.

#### 3.2 Typical procedure for preparation of **3**

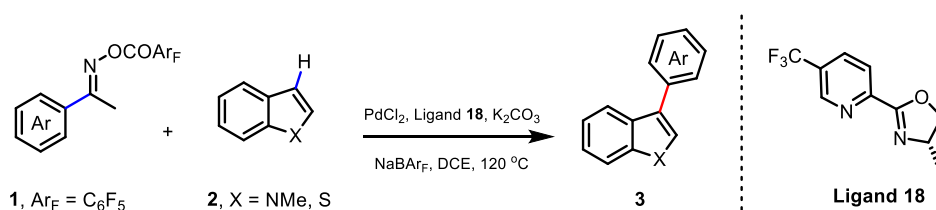

Under N<sub>2</sub> atmosphere, a mixture consisting of **1** (36.2 mg, 0.11 mmol), **2** (12.5 μl, 0.1 mmol), PdCl<sub>2</sub> (1.8 mg, 10 mol%), ligand **18** (6.9 mg, 30 mol%), NaBAR<sub>F</sub> (17.7 mg, 20 mol%), and K<sub>2</sub>CO<sub>3</sub> (13.8 mg, 0.1 mmol) in DCE (2.0 mL) was stirred at 120 °C for 12 h. After cooling to room temperature, solvent and other volatile components were removed on a rotary evaporator under reduced pressure, and the residue was subjected to column chromatography for isolation (gradient eluent: petroleum ether/ethyl acetate 100:1-1- 50:1) to give product **3**.

#### 3.3 Scalable synthesis

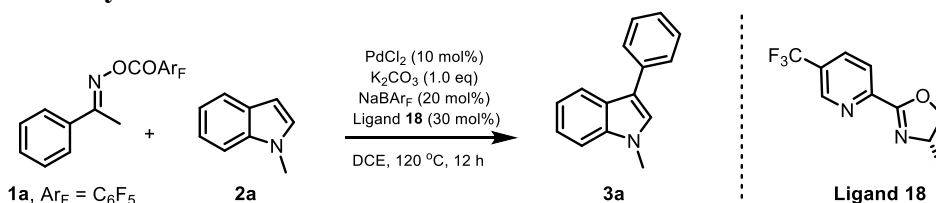

Under N<sub>2</sub> atmosphere, a mixture consisting of **1a** (2.17 g, 6.6 mmol), **2a** (750 μl, 6.0 mmol), PdCl<sub>2</sub> (106 mg, 10 mol%), ligand **18** (414 mg, 30 mol%), NaBAR<sub>F</sub> (1.06 g, 20 mol%), and K<sub>2</sub>CO<sub>3</sub> (828 mg, 6.0 mmol) in DCE (100 mL) was stirred at 120 °C for 12 h. After cooling to room temperature, solvent and other volatile components were removed on a rotary evaporator under reduced pressure, and the residue was subjected to column chromatography for isolation (gradient

eluent: petroleum ether/ethyl acetate 100:1:1- 50:1) to give product **3a** 0.81 g (65%).

#### 4. Mechanism Experiments

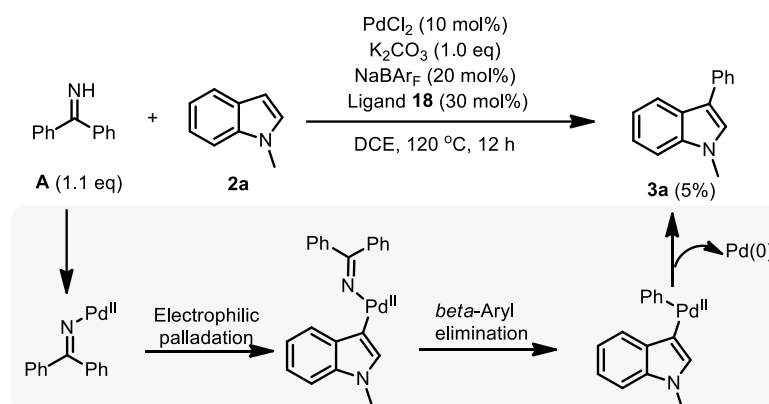

Under N<sub>2</sub> atmosphere, a mixture consisting of benzophenone imine **A** (18.4  $\mu$ l, 0.11 mmol), **2a** (12.5  $\mu$ l, 0.1 mmol), PdCl<sub>2</sub> (1.8 mg, 10 mol%), ligand **18** (6.9 mg, 30 mol%), NaBAR<sub>F</sub> (17.7 mg, 20 mol%), and K<sub>2</sub>CO<sub>3</sub> (13.8 mg, 0.1 mmol) in DCE (2.0 mL) was stirred at 120 °C for 12 h. Yields of products **3a** (5%) were determined by GC-MS using n-hexadecane as internal standard.

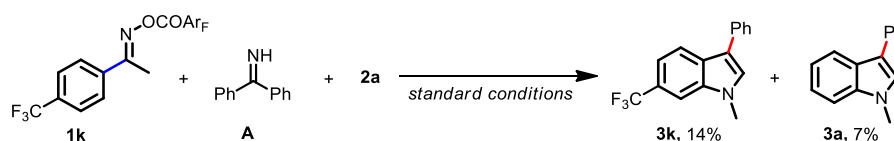

Under N<sub>2</sub> atmosphere, a mixture consisting of **1k** (45.4 mg, 0.11 mmol), benzophenone imine **A** (1.7  $\mu$ l, 0.01 mmol), **2a** (12.5  $\mu$ l, 0.1 mmol), PdCl<sub>2</sub> (1.8 mg, 10 mol%), ligand **18** (6.9 mg, 30 mol%), NaBAR<sub>F</sub> (17.7 mg, 20 mol%), and K<sub>2</sub>CO<sub>3</sub> (13.8 mg, 0.1 mmol) in DCE (2.0 mL) was stirred at 120 °C for 12 h. Yields of products **3k** (14%) and **3a** (7%) were determined by GC-MS using n-hexadecane as internal standard.

#### 5. Analytical Data

Substrates **1a**, **1f**, **1u-1v**, **1ai** and **1am** were known products and synthesized according to the literatures<sup>1d,3</sup>. Substrates **2a**, **2m**, and **2o** were commercially available. Substrates **2b-2l** and **2n** were known products and synthesized according to the literatures<sup>4,5</sup>.

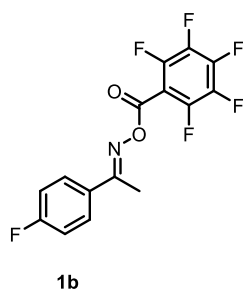

(*E*)-1-(4-fluorophenyl)ethan-1-one *O*-perfluorobenzoyl oxime (**1b**) as a white solid (0.489 g, 70% yield). Purification condition (hexane: ethyl acetate = 20: 1). <sup>1</sup>H NMR (500 MHz, CDCl<sub>3</sub>)  $\delta$

7.84 – 7.78 (m, 2H), 7.16 – 7.10 (m, 2H), 2.45 (s, 3H);  $^{13}\text{C}$  NMR (125 MHz,  $\text{CDCl}_3$ )  $\delta$  164.67 (d,  $J = 252$  Hz), 164.05, 156.44, 146.70 (m), 144.66 (m), 142.62 (m), 138.92 (m), 136.90 (m), 130.18 (d,  $J = 3.5$  Hz), 129.41 (d,  $J = 8.6$  Hz), 115.91 (d,  $J = 21.9$  Hz), 107.03, 14.88;  $^{19}\text{F}$  NMR (470 MHz,  $\text{CDCl}_3$ )  $\delta$  -108.62 – -108.68 (m), -136.99 – -137.08 (m), -147.46 (tt,  $J = 20.9, 5.5$  Hz), -159.70 – -159.89 (m); HRMS (EI)  $m/z$ :  $[\text{M}]^+$  calcd for  $\text{C}_{15}\text{H}_7\text{F}_6\text{NO}_2$ : 347.0375, found: 347.0380.

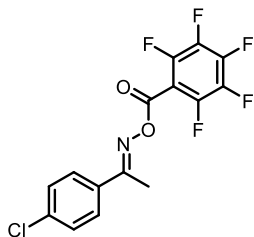

1c

**(E)-1-(4-chlorophenyl)ethan-1-one O-perfluorobenzoyl oxime (1c)** as a white solid (0.620 g, 85% yield). Purification condition (hexane: ethyl acetate = 20: 1).  $^1\text{H}$  NMR (500 MHz,  $\text{CDCl}_3$ )  $\delta$  7.74 (d,  $J = 8.7$  Hz, 2H), 7.42 (d,  $J = 8.6$  Hz, 2H), 2.45 (s, 3H);  $^{13}\text{C}$  NMR (125 MHz,  $\text{CDCl}_3$ )  $\delta$  164.00, 156.34, 146.70 (m), 144.67 (m), 142.61 (m), 138.91 (m), 137.47, 136.87 (m), 132.47, 129.04, 128.56, 106.94 (m), 14.74;  $^{19}\text{F}$  NMR (470 MHz,  $\text{CDCl}_3$ )  $\delta$  -136.91 – -137.01 (m), -147.32 (tt,  $J = 20.8, 5.2$  Hz), -157.96 – -161.65 (m); HRMS (EI)  $m/z$ :  $[\text{M}]^+$  calcd for  $\text{C}_{15}\text{H}_7\text{F}_5\text{ClNO}_2$ : 363.0080, found: 363.0061.

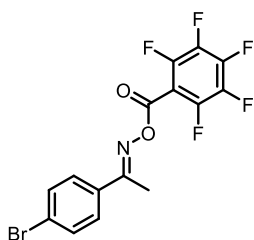

1d

**(E)-1-(4-bromophenyl)ethan-1-one O-perfluorobenzoyl oxime (1d)** as a white solid (0.593 g, 73% yield). Purification condition (hexane: ethyl acetate = 20: 1).  $^1\text{H}$  NMR (500 MHz,  $\text{CDCl}_3$ )  $\delta$  7.67 (d,  $J = 8.6$  Hz, 2H), 7.58 (d,  $J = 8.7$  Hz, 2H), 2.44 (s, 3H);  $^{13}\text{C}$  NMR (125 MHz,  $\text{CDCl}_3$ )  $\delta$  164.08, 156.31, 146.69 (m), 144.64 (m), 142.61 (m), 138.90 (m), 136.87 (m), 132.92, 132.01, 128.74, 125.87, 106.91 (m), 14.70;  $^{19}\text{F}$  NMR (470 MHz,  $\text{CDCl}_3$ )  $\delta$  -136.95 (d,  $J = 21.2$  Hz), -147.29 (t,  $J = 22.0$  Hz), -159.67 – -160.08 (m); HRMS (EI)  $m/z$ :  $[\text{M}]^+$  calcd for  $\text{C}_{15}\text{H}_7\text{F}_5\text{BrNO}_2$ : 406.9575, found: 406.9584.

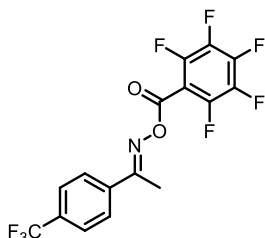

1e

**(E)-1-(4-(trifluoromethyl)phenyl)ethan-1-one O-perfluorobenzoyl oxime (1e)** as a white solid (0.548 g, 69% yield). Purification condition (hexane: ethyl acetate = 20: 1).  $^1\text{H}$  NMR (500 MHz,  $\text{CDCl}_3$ )  $\delta$  7.92 (d,  $J = 8.1$  Hz, 2H), 7.70 (d,  $J = 7.5$  Hz, 2H), 2.50 (s, 3H);  $^{13}\text{C}$  NMR (125 MHz,  $\text{CDCl}_3$ )  $\delta$  164.13, 156.58,



146.88 (m), 144.90 (m), 142.82 (m), 139.00 (m), 137.54, 136.98 (m), 132.97 (q,  $J = 32.7$  Hz), 127.74, 125.78 (q,  $J = 5.0$  Hz), 123.82 (q,  $J = 272.3$  Hz), 106.66 (m), 15.03;  $^{19}\text{F}$  NMR (470 MHz,  $\text{CDCl}_3$ )  $\delta$  -63.09, -136.90 – -136.99 (m), -147.17 (tt,  $J = 21.0, 5.3$  Hz), -159.66 – -159.84 (m); HRMS (EI)  $m/z$ :  $[\text{M}]^+$  calcd for  $\text{C}_{16}\text{H}_7\text{F}_8\text{NO}_2$ : 397.0344, found: 397.0377.

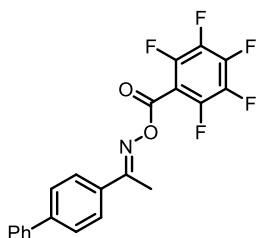

**1g**

**(E)-1-([1,1'-biphenyl]-4-yl)ethan-1-one O-perfluorobenzoyl oxime (1g)** as a white solid (0.605 g, 75% yield). Purification condition (crystallization from DCM/PE).  $^1\text{H}$  NMR (500 MHz,  $\text{CDCl}_3$ )  $\delta$  7.87 (d,  $J = 8.4$  Hz, 2H), 7.67 (d,  $J = 8.4$  Hz, 2H), 7.65 – 7.59 (m, 2H), 7.47 (t,  $J = 7.6$  Hz, 2H), 7.42 – 7.36 (m, 1H), 2.49 (s, 3H);  $^{13}\text{C}$  NMR (125 MHz,  $\text{CDCl}_3$ )  $\delta$  164.77, 156.62, 146.74 (m), 144.68 (m), 144.11, 142.62 (m), 140.11, 138.99 (m), 136.95 (m), 132.87, 129.07, 128.16, 127.81, 127.50, 127.28, 107.28 (m), 14.96;  $^{19}\text{F}$  NMR (470 MHz,  $\text{CDCl}_3$ )  $\delta$  -134.02 – -144.07 (m), -147.60 (tt,  $J = 20.6, 5.1$  Hz), -156.94 – -162.62 (m); HRMS (EI)  $m/z$ :  $[\text{M}]^+$  calcd for  $\text{C}_{21}\text{H}_{12}\text{F}_5\text{NO}_2$ : 405.0783, found: 405.0784.

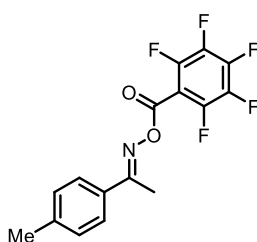

**1h**

**(E)-1-(p-tolyl)ethan-1-one O-perfluorobenzoyl oxime (1h)** as a white solid (0.617 g, 90% yield). Purification condition (hexane: ethyl acetate = 20: 1).  $^1\text{H}$  NMR (500 MHz,  $\text{CDCl}_3$ )  $\delta$  7.68 (d,  $J = 8.3$  Hz, 2H), 7.24 (d,  $J = 7.8$  Hz, 2H), 2.44 (s, 3H), 2.40 (s, 3H);  $^{13}\text{C}$  NMR (125 MHz,  $\text{CDCl}_3$ )  $\delta$  165.01, 156.61, 146.63 (m), 144.58 (m), 142.51 (m), 141.71, 138.91 (m), 136.88 (m), 131.15, 129.52, 127.21, 107.28 (m), 21.49, 14.86;  $^{19}\text{F}$  NMR (470 MHz,  $\text{CDCl}_3$ )  $\delta$  -137.07 – -137.16 (m), -147.80 (tt,  $J = 21.2, 5.3$  Hz), -159.82 – -160.00 (m); HRMS (EI)  $m/z$ :  $[\text{M}]^+$  calcd for  $\text{C}_{16}\text{H}_{10}\text{F}_5\text{NO}_2$ : 343.0626, found: 343.0632.

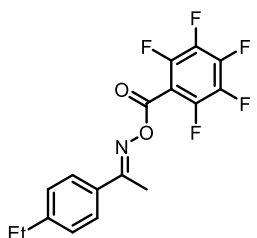

**1i**

**(E)-1-(4-ethylphenyl)ethan-1-one O-perfluorobenzoyl oxime (1i)** as a white solid (0.604 g, 85% yield). Purification condition (hexane: ethyl acetate = 20: 1).  $^1\text{H}$  NMR (500 MHz,  $\text{CDCl}_3$ )  $\delta$  7.71

(d,  $J = 8.2$  Hz, 2H), 7.26 (d,  $J = 8.2$  Hz, 2H), 2.69 (q,  $J = 7.6$  Hz, 2H), 2.44 (s, 3H), 1.25 (t,  $J = 7.6$  Hz, 3H);  $^{13}\text{C}$  NMR (125 MHz,  $\text{CDCl}_3$ )  $\delta$  165.03, 156.60, 147.94, 146.60 (m), 144.55 (m), 142.47 (m), 138.87 (m), 136.84 (m), 131.33, 128.30, 127.27, 107.26 (m), 28.82, 15.35, 14.83;  $^{19}\text{F}$  NMR (470 MHz,  $\text{CDCl}_3$ )  $\delta$  -132.67 – -142.83 (m), -144.96 – -150.66 (m), -155.94 – -163.43 (m); HRMS (EI)  $m/z$ :  $[\text{M}]^+$  calcd for  $\text{C}_{17}\text{H}_{12}\text{F}_5\text{NO}_2$ : 357.0783, found: 357.0787.

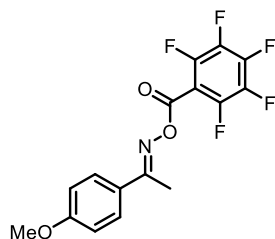

1j

**(*E*)-1-(4-ethylphenyl)ethan-1-one *O*-perfluorobenzoyl oxime (1j)** as a white solid (0.617 g, 86% yield). Purification condition (hexane: ethyl acetate = 10: 1).  $^1\text{H}$  NMR (500 MHz,  $\text{CDCl}_3$ )  $\delta$  7.76 (d,  $J = 8.9$  Hz, 2H), 6.94 (d,  $J = 8.9$  Hz, 2H), 3.86 (s, 3H), 2.43 (s, 3H);  $^{13}\text{C}$  NMR (125 MHz,  $\text{CDCl}_3$ )  $\delta$  164.51, 162.14, 156.67, 146.63 (m), 144.57 (m), 142.50 (m), 138.92 (m), 136.88 (m), 128.92, 126.23, 114.18, 107.35 (m), 55.51, 14.76;  $^{19}\text{F}$  NMR (470 MHz,  $\text{CDCl}_3$ )  $\delta$  -137.14 – -137.23 (m), -147.90 (tt,  $J = 20.8, 5.2$  Hz), -159.86 – -160.05 (m); HRMS (EI)  $m/z$ :  $[\text{M}]^+$  calcd for  $\text{C}_{16}\text{H}_{10}\text{F}_5\text{NO}_3$ : 359.0575, found: 359.0569.

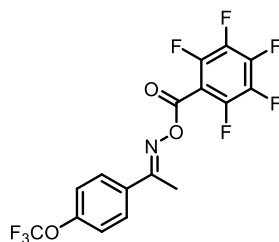

1k

**(*E*)-1-(4-(trifluoromethoxy)phenyl)ethan-1-one *O*-perfluorobenzoyl oxime (1k)** as a white solid (0.735 g, 89% yield). Purification condition (hexane: ethyl acetate = 20: 1).  $^1\text{H}$  NMR (500 MHz,  $\text{CDCl}_3$ )  $\delta$  7.85 (d,  $J = 8.9$  Hz, 2H), 7.29 (d,  $J = 8.1$  Hz, 2H), 2.47 (s, 3H);  $^{13}\text{C}$  NMR (125 MHz,  $\text{CDCl}_3$ )  $\delta$  163.84, 156.36, 151.36, 146.75 (m), 144.70 (m), 142.67 (m), 138.95 (m), 136.93 (m), 132.63, 129.01, 120.92, 120.45 (q,  $J = 258.2$  Hz), 106.94 (m), 14.78;  $^{19}\text{F}$  NMR (470 MHz,  $\text{CDCl}_3$ )  $\delta$  -57.78, -136.87 – -137.04 (m), -147.25 (t,  $J = 20.7$  Hz), -159.62 – -159.85 (m); HRMS (EI)  $m/z$ :  $[\text{M}]^+$  calcd for  $\text{C}_{16}\text{H}_7\text{F}_8\text{NO}_3$ : 413.0293, found: 413.0305.

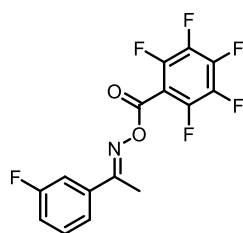

1l

**(*E*)-1-(3-fluorophenyl)ethan-1-one *O*-perfluorobenzoyl oxime (1l)** as a white solid (0.628 g,

91% yield). Purification condition (hexane: ethyl acetate = 20: 1).  $^1\text{H}$  NMR (500 MHz,  $\text{CDCl}_3$ )  $\delta$  7.57 (dt,  $J = 7.9, 1.1$  Hz, 1H), 7.53 – 7.50 (m, 1H), 7.42 (td,  $J = 8.0, 5.7$  Hz, 1H), 7.22 – 7.17 (m, 1H), 2.46 (s, 3H);  $^{13}\text{C}$  NMR (125 MHz,  $\text{CDCl}_3$ )  $\delta$  164.04 (d,  $J = 2.6$  Hz), 162.91 (d,  $J = 247.2$  Hz), 156.42, 146.61 (m), 144.73 (m), 142.88 (m), 138.79 (m), 137.13 (m), 136.24 (d,  $J = 7.7$  Hz), 130.51 (d,  $J = 8.1$  Hz), 123.09 (d,  $J = 3.1$  Hz), 118.29 (d,  $J = 21.1$  Hz), 114.40 (d,  $J = 23.4$  Hz), 106.99 (m), 15.04;  $^{19}\text{F}$  NMR (470 MHz,  $\text{CDCl}_3$ )  $\delta$  -111.88 (q,  $J = 8.3$  Hz), -136.90 – -136.99 (m), -147.30 (tt,  $J = 20.8, 5.4$  Hz), -159.65 – -159.84 (m); HRMS (EI)  $m/z$ :  $[\text{M}]^+$  calcd for  $\text{C}_{15}\text{H}_7\text{F}_6\text{NO}_2$ : 347.0375, found: 347.0389.

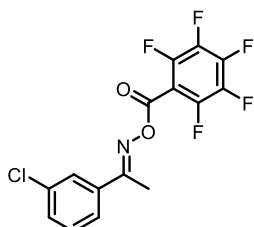

**1m**

**(*E*)-1-(3-chlorophenyl)ethan-1-one *O*-perfluorobenzoyl oxime (1m)** as a white solid (0.590 g, 81% yield). Purification condition (hexane: ethyl acetate = 20: 1).  $^1\text{H}$  NMR (500 MHz,  $\text{CDCl}_3$ )  $\delta$  7.79 (t,  $J = 1.9$  Hz, 1H), 7.67 (dt,  $J = 7.8, 1.3$  Hz, 1H), 7.48 – 7.46 (m, 1H), 7.39 (t,  $J = 7.9$  Hz, 1H), 2.45 (s, 3H);  $^{13}\text{C}$  NMR (125 MHz,  $\text{CDCl}_3$ )  $\delta$  163.96, 156.30, 146.73 (m), 144.72 (m), 142.65 (m), 138.92 (m), 136.88 (m), 135.80, 134.91, 131.21, 130.09, 127.31, 125.42, 106.87 (m), 14.90;  $^{19}\text{F}$  NMR (470 MHz,  $\text{CDCl}_3$ )  $\delta$  -136.86 – -136.95 (m), -145.90 – -148.62 (m), -158.22 – -161.86 (m); HRMS (EI)  $m/z$ :  $[\text{M}]^+$  calcd for  $\text{C}_{15}\text{H}_7\text{ClF}_5\text{NO}_2$ : 363.0080, found: 363.0072.

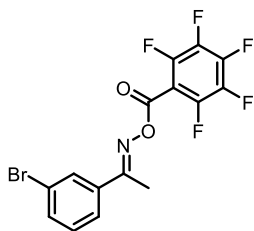

**1n**

**(*E*)-1-(3-bromophenyl)ethan-1-one *O*-perfluorobenzoyl oxime (1n)** as a white solid (0.585 g, 72% yield). Purification condition (hexane: ethyl acetate = 20: 1).  $^1\text{H}$  NMR (500 MHz,  $\text{CDCl}_3$ )  $\delta$  7.94 (t,  $J = 1.8$  Hz, 1H), 7.72 (dt,  $J = 7.8, 1.4$  Hz, 1H), 7.62 – 7.60 (m, 1H), 7.32 (t,  $J = 7.9$  Hz, 1H), 2.45 (s, 3H);  $^{13}\text{C}$  NMR (125 MHz,  $\text{CDCl}_3$ )  $\delta$  163.91, 156.34, 146.59 (m), 144.70 (m), 142.86 (m), 138.78 (m), 137.09 (m), 136.07, 134.19, 130.35, 130.24, 125.90, 122.99, 106.92 (m), 14.97;  $^{19}\text{F}$  NMR (470 MHz,  $\text{CDCl}_3$ )  $\delta$  -136.86 – -136.95 (m), -147.27 (tt,  $J = 20.9, 5.2$  Hz), -159.64 – -159.82 (m); HRMS (EI)  $m/z$ :  $[\text{M}]^+$  calcd for  $\text{C}_{15}\text{H}_7\text{BrF}_5\text{NO}_2$ : 406.9575, found: 406.9582.

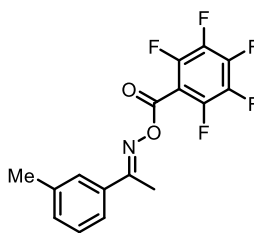

**1o**

**(E)-1-(*m*-tolyl)ethan-1-one *O*-perfluorobenzoyl oxime (1o)** as a white solid (0.638 g, 93% yield). Purification condition (hexane: ethyl acetate = 20: 1). <sup>1</sup>H NMR (500 MHz, CDCl<sub>3</sub>) δ 7.62 (s, 1H), 7.55 (dt, *J* = 7.5, 1.8 Hz, 1H), 7.33 (t, *J* = 7.5 Hz, 1H), 7.30 (dt, *J* = 6.4, 1.4 Hz, 1H), 2.45 (s, 3H), 2.40 (s, 3H); <sup>13</sup>C NMR (125 MHz, CDCl<sub>3</sub>) δ 165.45, 156.63, 146.52 (m), 144.57 (m), 142.75 (m), 138.78 (m), 138.67, 137.09 (m), 134.04, 132.07, 128.74, 127.84, 124.51, 107.24 (m), 21.50, 15.16; <sup>19</sup>F NMR (470 MHz, CDCl<sub>3</sub>) δ -137.02 – -137.10 (m), -147.70 (t, *J* = 21.3 Hz), -159.82 – -159.96 (m); HRMS (EI) *m/z*: [M]<sup>+</sup> calcd for C<sub>16</sub>H<sub>10</sub>F<sub>5</sub>NO<sub>2</sub>: 343.0626, found: 343.0626.

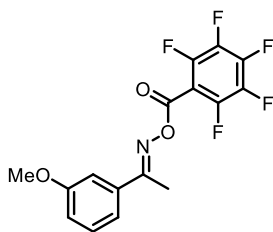

1p

**(E)-1-(3-methoxyphenyl)ethan-1-one *O*-perfluorobenzoyl oxime (1p)** as a white solid (0.538 g, 75% yield). Purification condition (hexane: ethyl acetate = 10: 1). <sup>1</sup>H NMR (500 MHz, CDCl<sub>3</sub>) δ 7.38 – 7.30 (m, 3H), 7.03 (dt, *J* = 7.2, 2.4 Hz, 1H), 3.86 (s, 3H), 2.45 (s, 3H); <sup>13</sup>C NMR (125 MHz, CDCl<sub>3</sub>) δ 165.14, 159.88, 156.59, 146.52 (m), 144.62 (m), 142.77 (m), 138.79 (m), 137.10 (m), 135.46, 129.89, 119.85, 117.23, 112.44, 107.24 (m), 55.57, 15.21; <sup>19</sup>F NMR (470 MHz, CDCl<sub>3</sub>) δ -137.00 – -137.10 (m), -147.58 – -147.69 (m), -159.80 – -159.92 (m); HRMS (EI) *m/z*: [M]<sup>+</sup> calcd for C<sub>16</sub>H<sub>10</sub>F<sub>5</sub>NO<sub>3</sub>: 359.0575, found: 359.0584.

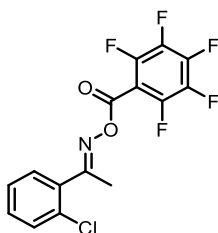

1q

**(E)-1-(2-chlorophenyl) ethan-1-one *O*-perfluorobenzoyl oxime (1q)** as a white solid (0.568 g, 78% yield). Purification condition (hexane: ethyl acetate = 20: 1). <sup>1</sup>H NMR (500 MHz, CDCl<sub>3</sub>) δ 7.46 – 7.43 (m, 2H), 7.40 (td, *J* = 7.7, 1.8 Hz, 1H), 7.33 (td, *J* = 7.5, 1.3 Hz, 1H), 2.46 (s, 3H); <sup>13</sup>C NMR (125 MHz, CDCl<sub>3</sub>) δ 166.89, 156.46, 146.58 (m), 144.67 (m), 142.85 (m), 138.78 (m), 137.10 (m), 134.51, 132.59, 131.32, 130.38, 130.29, 127.18, 106.99 (m), 18.51; <sup>19</sup>F NMR (470 MHz, CDCl<sub>3</sub>) δ -136.75 – -136.84 (m), -147.38 (t, *J* = 20.9 Hz), -159.77 – -159.88 (m); HRMS (EI) *m/z*: [M]<sup>+</sup> calcd for C<sub>15</sub>H<sub>7</sub>ClF<sub>5</sub>NO<sub>2</sub>: 363.0080, found: 363.0130.

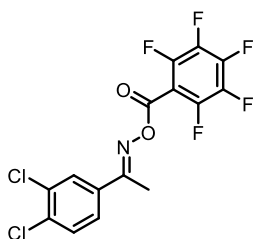

1r

**(E)-1-(3,4-dichlorophenyl)ethan-1-one O-perfluorobenzoyl oxime (1r)** as a white solid (0.659 g, 83% yield). Purification condition (hexane: ethyl acetate = 20: 1).  $^1\text{H}$  NMR (500 MHz,  $\text{CDCl}_3$ )  $\delta$  7.90 (d,  $J = 2.1$  Hz, 1H), 7.65 (dd,  $J = 8.4, 2.1$  Hz, 1H), 7.53 (d,  $J = 8.4$  Hz, 1H), 2.44 (s, 3H);  $^{13}\text{C}$  NMR (125 MHz,  $\text{CDCl}_3$ )  $\delta$  163.00, 156.16, 146.77 (m), 144.79 (m), 142.72 (m), 138.94 (m), 136.90 (m), 135.59, 133.93, 133.26, 130.79, 129.07, 126.39, 106.73 (m), 14.67;  $^{19}\text{F}$  NMR (470 MHz,  $\text{CDCl}_3$ )  $\delta$  -136.79 – -136.88 (m), -147.02 (tt,  $J = 20.7, 5.2$  Hz), -159.54 – -159.73 (m); HRMS (EI)  $m/z$ :  $[\text{M}]^+$  calcd for  $\text{C}_{15}\text{H}_6\text{Cl}_2\text{F}_5\text{NO}_2$ : 396.9690, found: 396.9700.

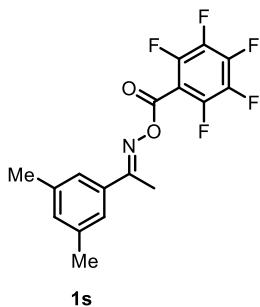

**(E)-1-(3,5-dimethylphenyl)ethan-1-one O-perfluorobenzoyl oxime (1s)** as a white solid (0.558 g, 78% yield). Purification condition (hexane: ethyl acetate = 20: 1).  $^1\text{H}$  NMR (500 MHz,  $\text{CDCl}_3$ )  $\delta$  7.39 (s, 2H), 7.12 (s, 1H), 2.44 (s, 3H), 2.36 (s, 6H);  $^{13}\text{C}$  NMR (125 MHz,  $\text{CDCl}_3$ )  $\delta$  165.52, 156.49, 146.63 (m), 144.55 (m), 142.48 (m), 138.87 (m), 138.42, 136.84 (m), 133.90, 132.85, 124.98, 107.20 (m), 21.25, 15.04;  $^{19}\text{F}$  NMR (470 MHz,  $\text{CDCl}_3$ )  $\delta$  -136.98 – -137.16 (m), -147.77 (t,  $J = 20.9$  Hz), -159.86 – -159.98 (m); HRMS (EI)  $m/z$ :  $[\text{M}]^+$  calcd for  $\text{C}_{17}\text{H}_{12}\text{F}_5\text{NO}_2$ : 357.0783, found: 357.0790.

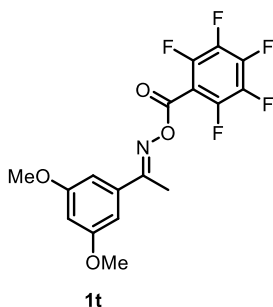

**(E)-1-(3,5-dimethoxyphenyl)ethan-1-one O-perfluorobenzoyl oxime (1t)** as a white solid (0.663 g, 85% yield). Purification condition (hexane: ethyl acetate = 20: 1).  $^1\text{H}$  NMR (500 MHz,  $\text{CDCl}_3$ )  $\delta$  6.90 (d,  $J = 2.2$  Hz, 2H), 6.57 (t,  $J = 2.3$  Hz, 1H), 3.84 (s, 6H), 2.43 (s, 3H);  $^{13}\text{C}$  NMR (125 MHz,  $\text{CDCl}_3$ )  $\delta$  165.05, 160.91, 156.39, 146.64 (m), 144.58 (m), 142.50 (m), 138.86 (m), 136.83 (m), 135.92, 107.06 (m), 105.29, 103.08, 55.50, 15.02;  $^{19}\text{F}$  NMR (470 MHz,  $\text{CDCl}_3$ )  $\delta$  -136.99 – -137.08 (m), -147.61 (tt,  $J = 20.9, 5.2$  Hz), -159.76 – -159.95 (m); HRMS (EI)  $m/z$ :  $[\text{M}]^+$  calcd for  $\text{C}_{17}\text{H}_{12}\text{F}_5\text{NO}_4$ : 389.0681, found: 389.0678.

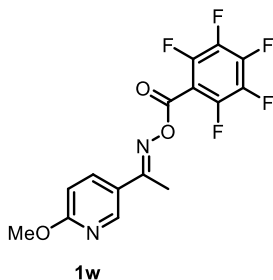

**(E)-1-(6-methoxypyridin-3-yl)ethan-1-one O-perfluorobenzoyl oxime (1w)** as a white solid

(0.469 mg, 65% yield). Purification condition (crystallization from DCM/PE).  $^1\text{H}$  NMR (500 MHz,  $\text{CDCl}_3$ )  $\delta$  8.52 (d,  $J = 2.5$  Hz, 1H), 8.11 (dd,  $J = 8.8, 2.5$  Hz, 1H), 6.80 (d,  $J = 8.8$  Hz, 1H), 3.99 (s, 3H), 2.45 (s, 3H);  $^{13}\text{C}$  NMR (125 MHz,  $\text{CDCl}_3$ )  $\delta$  165.91, 162.55, 156.25, 146.62 (m), 146.45, 144.56 (m), 142.49 (m), 138.82, 136.92, 136.81 (m), 123.15, 111.12, 106.91, 53.75, 14.12;  $^{19}\text{F}$  NMR (470 MHz,  $\text{CDCl}_3$ )  $\delta$  -136.99 – -137.08 (m), -147.43 (tt,  $J = 22.0, 5.8$  Hz), -159.69 – -159.82 (m); HRMS (EI)  $m/z$ :  $[\text{M}]^+$  calcd for  $\text{C}_{15}\text{H}_9\text{F}_5\text{N}_2\text{O}_3$ : 360.0528, found: 360.0527.

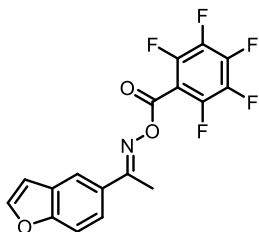

1x

**(E)-1-(benzofuran-5-yl)ethan-1-one O-perfluorobenzoyl oxime (1x)** as a white solid (0.458 g, 62% yield). Purification condition (crystallization from DCM/PE).  $^1\text{H}$  NMR (500 MHz,  $\text{CDCl}_3$ )  $\delta$  8.05 (d,  $J = 2.0$  Hz, 1H), 7.78 (dd,  $J = 8.7, 1.9$  Hz, 1H), 7.68 (d,  $J = 2.2$  Hz, 1H), 7.55 (d,  $J = 8.7$  Hz, 1H), 6.85 – 6.80 (m, 1H), 2.53 (s, 3H);  $^{13}\text{C}$  NMR (125 MHz,  $\text{CDCl}_3$ )  $\delta$  165.36, 156.65, 156.60, 146.68 (m), 146.33, 144.66 (m), 142.59 (m), 138.98 (m), 136.95 (m), 129.08, 127.95, 123.72, 120.92, 111.89, 107.34 (m), 107.09, 15.43;  $^{19}\text{F}$  NMR (470 MHz,  $\text{CDCl}_3$ )  $\delta$  -136.97 – -137.15 (m), -147.68 (t,  $J = 21.1$  Hz), -159.78 – -159.91 (m); HRMS (EI)  $m/z$ :  $[\text{M}]^+$  calcd for  $\text{C}_{17}\text{H}_8\text{F}_5\text{NO}_3$ : 369.0419, found: 369.0424.

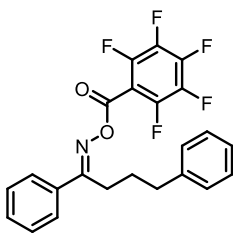

1a-1

**(E)-1,4-diphenylbutan-1-one O-perfluorobenzoyl oxime (1a-1)** as a white solid (0.607 g, 70% yield). Purification condition (hexane: ethyl acetate = 20: 1).  $^1\text{H}$  NMR (500 MHz,  $\text{CDCl}_3$ )  $\delta$  7.69 (d,  $J = 7.7$  Hz, 2H), 7.48 (t,  $J = 7.2$  Hz, 1H), 7.41 (t,  $J = 7.5$  Hz, 2H), 7.23 (t,  $J = 7.4$  Hz, 2H), 7.16 (d,  $J = 7.4$  Hz, 1H), 7.12 (d,  $J = 7.6$  Hz, 2H), 2.94 – 2.86 (m, 2H), 2.69 (t,  $J = 7.4$  Hz, 2H), 1.95 – 1.89 (m, 2H);  $^{13}\text{C}$  NMR (125 MHz,  $\text{CDCl}_3$ )  $\delta$  168.76, 156.64, 146.65 (m), 144.61 (m), 142.59 (m), 140.98, 138.95 (m), 136.92 (m), 133.17, 131.24, 128.96, 128.50, 128.48, 127.55, 126.23, 107.17 (m), 35.71, 28.34, 28.30;  $^{19}\text{F}$  NMR (470 MHz, Chloroform-d)  $\delta$  -137.04 – -137.13 (m), -147.59 – -147.74 (m), -159.63 – -159.82 (m).

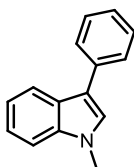

3a

**1-methyl-3-phenyl-1H-indole (3a)**<sup>5</sup> as a yellow oil (14.5 mg, 70% yield). Purification condition (hexane: ethyl acetate = 20: 1).  $^1\text{H}$  NMR (500 MHz,  $\text{CDCl}_3$ )  $\delta$  7.94 (dt,  $J = 8.2, 1.0$  Hz, 1H), 7.67 – 7.63 (m, 2H), 7.45 – 7.40 (m, 2H), 7.37 – 7.33 (m, 1H), 7.29 – 7.24 (m, 2H), 7.22 (s, 1H), 7.20 – 7.17 (m, 1H), 3.82 (s, 3H);  $^{13}\text{C}$  NMR (125 MHz,  $\text{CDCl}_3$ )  $\delta$  137.55, 135.75, 128.82, 127.40, 126.62,

126.23, 125.77, 122.04, 120.01, 119.96, 116.79, 109.61, 32.94.

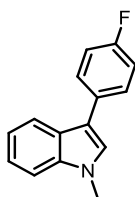

**3b**

**3-(4-fluorophenyl)-1-methyl-1H-indole (3b)**<sup>6</sup> as a yellow solid (14.6 mg, 65% yield). Purification condition (hexane: ethyl acetate = 20: 1). <sup>1</sup>H NMR (500 MHz, CDCl<sub>3</sub>) δ 7.86 (d, *J* = 8.0 Hz, 1H), 7.61 – 7.55 (m, 2H), 7.36 (d, *J* = 8.2 Hz, 1H), 7.30 – 7.26 (m, 1H), 7.21 – 7.16 (m, 2H), 7.15 – 7.08 (m, 2H), 3.82 (s, 3H); <sup>13</sup>C NMR (125 MHz, CDCl<sub>3</sub>) δ 161.40 (d, *J* = 244.3 Hz), 137.45, 131.73 (d, *J* = 3.2 Hz), 128.79 (d, *J* = 7.8 Hz), 126.43, 126.17, 122.14, 120.03, 119.70, 115.87, 115.64 (d, *J* = 21.3 Hz), 109.65, 32.95; <sup>19</sup>F NMR (470 MHz, CDCl<sub>3</sub>) δ -117.33 – 117.39 (m).

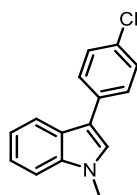

**3c**

**3-(4-chlorophenyl)-1-methyl-1H-indole (3c)**<sup>7</sup> as a yellow solid (17.4 mg, 72% yield). Purification condition (hexane: ethyl acetate = 20: 1). <sup>1</sup>H NMR (500 MHz, CDCl<sub>3</sub>) δ 7.88 (dt, *J* = 8.0, 1.0 Hz, 1H), 7.59 – 7.54 (m, 2H), 7.41 – 7.34 (m, 3H), 7.30 – 7.27 (m, 1H), 7.22 – 7.17 (m, 2H), 3.82 (s, 3H); <sup>13</sup>C NMR (125 MHz, CDCl<sub>3</sub>) δ 137.55, 134.24, 131.34, 128.94, 128.47, 126.71, 126.00, 122.23, 120.19, 119.74, 115.61, 109.72, 32.99.

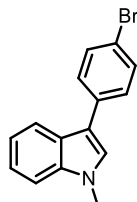

**3d**

**3-(4-bromophenyl)-1-methyl-1H-indole (3d)**<sup>5</sup> as a yellow solid (14 mg, 49% yield). Purification condition (hexane: ethyl acetate = 20: 1). <sup>1</sup>H NMR (500 MHz, CDCl<sub>3</sub>) δ 7.88 (dt, *J* = 8.1, 1.0 Hz, 1H), 7.56 – 7.49 (m, 4H), 7.36 (dt, *J* = 8.2, 0.9 Hz, 1H), 7.30 – 7.27 (m, 1H), 7.22 (s, 1H), 7.21 – 7.18 (m, 1H), 3.83 (s, 3H); <sup>13</sup>C NMR (125 MHz, CDCl<sub>3</sub>) δ 137.56, 134.70, 131.88, 128.83, 126.71, 125.95, 122.25, 120.22, 119.74, 119.34, 115.61, 109.74, 33.02.

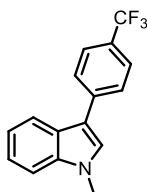

**3e**

**1-methyl-3-(4-(trifluoromethyl)phenyl)-1H-indole (3e)**<sup>5</sup> as a yellow solid (15.5 mg, 56% yield). **L22** was used instead of **L18**. Purification condition (hexane: ethyl acetate = 20: 1). <sup>1</sup>H NMR (500 MHz, CDCl<sub>3</sub>) δ 7.92 (d, *J* = 8.0 Hz, 1H), 7.72 (d, *J* = 8.1 Hz, 2H), 7.64 (d, *J* = 8.2 Hz, 2H),

7.36 (d,  $J = 8.3$  Hz, 1H), 7.31 – 7.27 (m, 1H), 7.24 (s, 1H), 7.23 – 7.19 (m, 1H), 3.79 (s, 3H);  $^{13}\text{C}$  NMR (125 MHz,  $\text{CDCl}_3$ )  $\delta$  139.55, 137.70, 127.48 (q,  $J = 32.4$  Hz), 127.46, 127.12, 125.94, 125.81 (q,  $J = 3.8$  Hz), 124.68 (q,  $J = 271.7$  Hz), 122.47, 120.56, 119.77, 115.39, 109.94, 33.07;  $^{19}\text{F}$  NMR (470 MHz,  $\text{CDCl}_3$ )  $\delta$  -62.14.

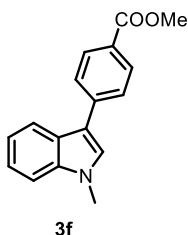

**methyl 4-(1-methyl-1H-indol-3-yl) benzoate (3f)** as a yellow solid (20.0 mg, 75% yield). **L23** was used instead of **L18**. Purification condition (hexane: ethyl acetate = 20: 1).  $^1\text{H}$  NMR (500 MHz,  $\text{CDCl}_3$ )  $\delta$  8.09 (d,  $J = 8.0$  Hz, 2H), 7.97 (d,  $J = 8.0$  Hz, 1H), 7.73 (d,  $J = 8.5$  Hz, 2H), 7.38 (d,  $J = 8.2$  Hz, 1H), 7.33 (s, 1H), 7.32 – 7.27 (m, 1H), 7.23 (t,  $J = 7.4$  Hz, 1H), 3.93 (s, 3H), 3.85 (s, 3H);  $^{13}\text{C}$  NMR (125 MHz,  $\text{CDCl}_3$ )  $\delta$  167.29, 140.67, 137.70, 130.25, 127.63, 127.00, 126.63, 125.91, 122.39, 120.52, 119.95, 115.70, 109.85, 52.07, 33.11; HRMS (ESI-TOF)  $m/z$ :  $[\text{M}+\text{H}]^+$  calcd for  $\text{C}_{17}\text{H}_{16}\text{NO}_2$ : 266.1176, found: 266.1174.

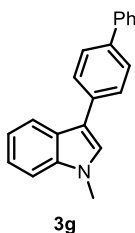

**3-([1,1'-biphenyl]-4-yl)-1-methyl-1H-indole (3g)**<sup>8</sup> as a yellow solid (16.1 mg, 57% yield). **L23** was used instead of **L18**. Purification condition (hexane: ethyl acetate = 20: 1).  $^1\text{H}$  NMR (500 MHz,  $\text{CDCl}_3$ )  $\delta$  7.99 (d,  $J = 8.0$  Hz, 1H), 7.76 – 7.72 (m, 2H), 7.69 – 7.64 (m, 4H), 7.45 (t,  $J = 7.7$  Hz, 2H), 7.37 (d,  $J = 8.2$  Hz, 1H), 7.36 – 7.32 (m, 1H), 7.32 – 7.26 (m, 2H), 7.23 – 7.20 (m, 1H), 3.84 (s, 3H);  $^{13}\text{C}$  NMR (125 MHz,  $\text{CDCl}_3$ )  $\delta$  141.12, 138.49, 137.60, 134.84, 128.85, 127.62, 127.53, 127.11, 127.00, 126.72, 126.21, 122.11, 120.06, 116.29, 109.67, 33.01.

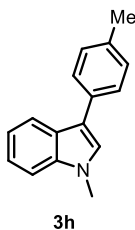

**1-methyl-3-(p-tolyl)-1H-indole (3h)**<sup>6</sup> as a yellow solid (14.6 mg, 66% yield). Purification condition (hexane: ethyl acetate = 20: 1).  $^1\text{H}$  NMR (500 MHz,  $\text{CDCl}_3$ )  $\delta$  7.92 (dt,  $J = 8.0, 1.0$  Hz, 1H), 7.57 – 7.52 (m, 2H), 7.35 (dt,  $J = 8.2, 1.0$  Hz, 1H), 7.29 – 7.23 (m, 3H), 7.20 – 7.15 (m, 2H), 3.81 (s, 3H), 2.39 (s, 3H);  $^{13}\text{C}$  NMR (125 MHz,  $\text{CDCl}_3$ )  $\delta$  137.50, 135.38, 132.77, 129.53, 127.33, 126.34, 126.30, 121.96, 120.04, 119.82, 116.74, 109.55, 32.91, 21.23.



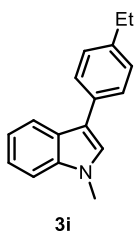

**3-(4-ethylphenyl)-1-methyl-1H-indole (3i)** as a yellow oil (14.1 mg, 60% yield). Purification condition (hexane: ethyl acetate = 20: 1).  $^1\text{H}$  NMR (500 MHz,  $\text{CDCl}_3$ )  $\delta$  7.93 (dt,  $J = 8.1, 1.0$  Hz, 1H), 7.59 – 7.55 (m, 2H), 7.35 (dt,  $J = 8.3, 0.9$  Hz, 1H), 7.29 – 7.24 (m, 3H), 7.20 – 7.15 (m, 2H), 3.82 (s, 3H), 2.69 (q,  $J = 7.6$  Hz, 2H), 1.29 (t,  $J = 7.6$  Hz, 3H);  $^{13}\text{C}$  NMR (125 MHz,  $\text{CDCl}_3$ )  $\delta$  141.79, 137.50, 133.04, 128.32, 127.39, 126.37, 126.31, 121.94, 120.07, 119.80, 116.78, 109.53, 32.92, 28.66, 15.74; HRMS (ESI-TOF)  $m/z$ :  $[\text{M}+\text{H}]^+$  calcd for  $\text{C}_{17}\text{H}_{18}\text{N}$ : 236.1434, found: 236.1435.

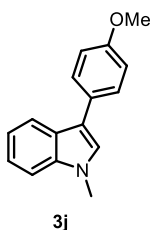

**3-(4-methoxyphenyl)-1-methyl-1H-indole (3j)**<sup>5</sup> as a yellow solid (10.0 mg, 42% yield). Purification condition (hexane: ethyl acetate = 20: 1).  $^1\text{H}$  NMR (500 MHz,  $\text{CDCl}_3$ )  $\delta$  7.89 (dt,  $J = 8.0, 1.0$  Hz, 1H), 7.59 – 7.54 (m, 2H), 7.35 (dt,  $J = 8.2, 0.9$  Hz, 1H), 7.30 – 7.25 (m, 1H), 7.20 – 7.14 (m, 2H), 7.01 – 6.96 (m, 2H), 3.85 (s, 3H), 3.83 (s, 3H);  $^{13}\text{C}$  NMR (125 MHz,  $\text{CDCl}_3$ )  $\delta$  158.00, 137.43, 128.54, 128.31, 126.35, 126.02, 121.94, 119.92, 119.75, 116.49, 114.32, 109.52, 55.44, 32.90.

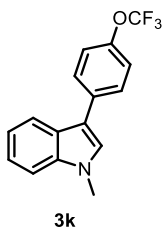

**1-methyl-3-(4-(trifluoromethoxy)phenyl)-1H-indole (3k)** as a yellow oil (13.1 mg, 45% yield). **L22** was used instead of **L18**. Purification condition (hexane: ethyl acetate = 20: 1).  $^1\text{H}$  NMR (500 MHz,  $\text{CDCl}_3$ )  $\delta$  7.89 (dt,  $J = 7.9, 1.0$  Hz, 1H), 7.66 – 7.61 (m, 2H), 7.36 (dt,  $J = 8.3, 0.9$  Hz, 1H), 7.32 – 7.25 (m, 3H), 7.22 – 7.18 (m, 2H), 3.81 (s, 3H);  $^{13}\text{C}$  NMR (125 MHz,  $\text{CDCl}_3$ )  $\delta$  147.25, 137.50, 134.62, 128.37, 126.81, 125.99, 122.25, 121.49, 120.68 (q,  $J = 255.0$  Hz), 120.22, 119.66, 115.42, 109.75, 32.98;  $^{19}\text{F}$  NMR (470 MHz,  $\text{CDCl}_3$ )  $\delta$  -57.81; HRMS (ESI-TOF)  $m/z$ :  $[\text{M}+\text{H}]^+$  calcd for  $\text{C}_{16}\text{H}_{13}\text{F}_3\text{NO}$ : 292.0944, found: 292.0930.

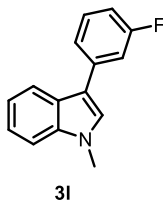

**3-(3-fluorophenyl)-1-methyl-1H-indole (3l)** as a yellow oil (11.0 mg, 49% yield). Purification condition (hexane: ethyl acetate = 20: 1).  $^1\text{H}$  NMR (500 MHz,  $\text{CDCl}_3$ )  $\delta$  7.93 (d,  $J = 8.1$  Hz, 1H), 7.43 (dt,  $J = 7.7, 1.3$  Hz, 1H), 7.40 – 7.32 (m, 3H), 7.31 – 7.27 (m, 1H), 7.24 (d,  $J = 0.7$  Hz,

1H), 7.22 – 7.19 (m, 1H), 6.96 – 6.92 (m, 1H), 3.83 (s, 3H); <sup>13</sup>C NMR (125 MHz, CDCl<sub>3</sub>) δ 163.37 (d, *J* = 245.0 Hz), 138.02 (d, *J* = 8.2 Hz), 137.58, 130.20 (d, *J* = 9.0 Hz), 127.01, 125.97, 122.84, 122.28, 120.29, 119.81, 115.69, 113.87 (d, *J* = 21.8 Hz), 112.41 (d, *J* = 21.1 Hz), 109.75, 33.01; <sup>19</sup>F NMR (470 MHz, CDCl<sub>3</sub>) δ -113.41 (q, *J* = 8.6 Hz); HRMS (ESI-TOF) *m/z*: [M+H]<sup>+</sup> calcd for C<sub>15</sub>H<sub>13</sub>FN: 226.1027, found:226.1021.

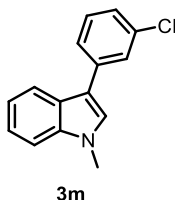

**3-(3-chlorophenyl)-1-methyl-1H-indole (3m)**<sup>9</sup> as a yellow oil (14.5 mg, 60% yield). **L23** was used instead of **L18**. Purification condition (hexane: ethyl acetate = 20: 1). <sup>1</sup>H NMR (500 MHz, CDCl<sub>3</sub>) δ 7.91 (dt, *J* = 8.0, 1.0 Hz, 1H), 7.63 (t, *J* = 1.9 Hz, 1H), 7.53 (dt, *J* = 7.7, 1.3 Hz, 1H), 7.37 – 7.32 (m, 2H), 7.30 – 7.27 (m, 1H), 7.23 – 7.18 (m, 3H), 3.82 (s, 3H); <sup>13</sup>C NMR (125 MHz, CDCl<sub>3</sub>) δ 137.63, 137.56, 134.60, 130.02, 127.13, 127.01, 125.93, 125.66, 125.32, 122.29, 120.30, 119.75, 115.44, 109.75, 33.01.

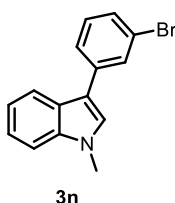

**3-(3-bromophenyl)-1-methyl-1H-indole (3n)** as a yellow oil (10.8 mg, 38% yield). **L23** was used instead of **L18**. Purification condition (hexane: ethyl acetate = 20: 1). <sup>1</sup>H NMR (500 MHz, CDCl<sub>3</sub>) δ 7.91 (d, *J* = 8.0 Hz, 1H), 7.79 (t, *J* = 1.9 Hz, 1H), 7.58 (dt, *J* = 7.7, 1.4 Hz, 1H), 7.39 – 7.34 (m, 2H), 7.31 – 7.26 (m, 2H), 7.24 (s, 1H), 7.23 – 7.19 (m, 1H), 3.84 (s, 3H); <sup>13</sup>C NMR (125 MHz, CDCl<sub>3</sub>) δ 137.92, 137.53, 130.31, 130.04, 128.56, 127.02, 125.90, 125.77, 122.92, 122.30, 120.31, 119.72, 115.31, 109.76, 33.05; HRMS (ESI-TOF) *m/z*: [M+H]<sup>+</sup> calcd for C<sub>15</sub>H<sub>13</sub>BrN: 286.0226, found: 286.0025.

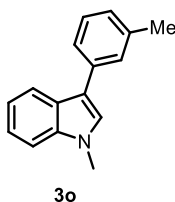

**1-methyl-3-(m-tolyl)-1H-indole (3o)**<sup>9</sup> as a yellow oil (15.0 mg, 68% yield). Purification condition (hexane: ethyl acetate = 20: 1). <sup>1</sup>H NMR (500 MHz, CDCl<sub>3</sub>) δ 7.94 (d, *J* = 8.0 Hz, 1H), 7.46 (d, *J* = 8.5 Hz, 2H), 7.37 – 7.29 (m, 2H), 7.29 – 7.25 (m, 1H), 7.21 (s, 1H), 7.20 – 7.17 (m, 1H), 7.08 (d, *J* = 7.5 Hz, 1H), 3.81 (s, 3H), 2.42 (s, 3H); <sup>13</sup>C NMR (125 MHz, CDCl<sub>3</sub>) δ 138.35, 137.54, 135.65, 128.73, 128.16, 126.60, 126.28, 124.52, 121.99, 120.08, 119.88, 116.85, 109.57, 32.92, 21.68.

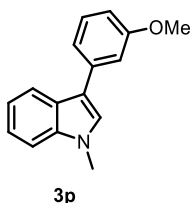

**3-(3-methoxyphenyl)-1-methyl-1H-indole (3p)**<sup>10</sup> as a yellow oil (17.1 mg, 72% yield). Purification condition (hexane: ethyl acetate = 20: 1). <sup>1</sup>H NMR (500 MHz, CDCl<sub>3</sub>) δ 7.95 (d, *J* = 8.1 Hz, 1H), 7.34 (t, *J* = 7.8 Hz, 2H), 7.29 – 7.26 (m, 1H), 7.24 (dt, *J* = 7.5, 1.3 Hz, 1H), 7.22 (s, 1H), 7.21 (dd, *J* = 2.6, 1.6 Hz, 1H), 7.20 – 7.16 (m, 1H), 6.83 – 6.81 (m, 1H), 3.86 (s, 3H), 3.81 (s, 3H); <sup>13</sup>C NMR (125 MHz, CDCl<sub>3</sub>) δ 160.03, 137.54, 137.13, 129.78, 126.76, 126.19, 122.07, 120.03, 120.00, 119.96, 116.64, 112.98, 111.24, 109.62, 55.32, 32.94.

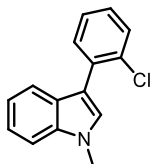

3q

**3-(2-chlorophenyl)-1-methyl-1H-indole (3q)**<sup>9</sup> as a yellow oil (16.4 mg, 68% yield). **L24** was used instead of **L18**. Purification condition (hexane: ethyl acetate = 20: 1). <sup>1</sup>H NMR (500 MHz, CDCl<sub>3</sub>) δ 7.65 (dt, *J* = 7.9, 1.0 Hz, 1H), 7.57 (dd, *J* = 7.6, 1.7 Hz, 1H), 7.51 (dd, *J* = 7.9, 1.3 Hz, 1H), 7.37 (dt, *J* = 8.3, 0.9 Hz, 1H), 7.34 – 7.29 (m, 2H), 7.29 – 7.26 (m, 1H), 7.24 – 7.20 (m, 1H), 7.18 – 7.14 (m, 1H), 3.85 (s, 3H); <sup>13</sup>C NMR (125 MHz, CDCl<sub>3</sub>) δ 136.74, 133.96, 133.12, 131.89, 130.22, 128.92, 127.39, 127.09, 126.72, 121.99, 120.25, 119.87, 113.19, 109.56, 33.06.

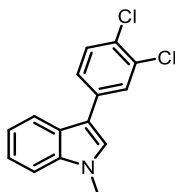

3r

**3-(3,4-dichlorophenyl)-1-methyl-1H-indole (3r)** as a yellow solid (11.6 mg, 42% yield). **L23** was used instead of **L18**. Purification condition (hexane: ethyl acetate = 20: 1). <sup>1</sup>H NMR (500 MHz, CDCl<sub>3</sub>) δ 7.87 (dt, *J* = 8.1, 1.0 Hz, 1H), 7.72 (t, *J* = 1.2 Hz, 1H), 7.49 – 7.45 (m, 2H), 7.37 (d, *J* = 8.2 Hz, 1H), 7.32 – 7.29 (m, 1H), 7.24 – 7.19 (m, 2H), 3.84 (s, 3H); <sup>13</sup>C NMR (125 MHz, CDCl<sub>3</sub>) δ 137.52, 135.91, 132.68, 130.66, 129.19, 128.67, 127.08, 126.38, 125.71, 122.42, 120.46, 119.54, 114.41, 109.86, 33.09; HRMS (ESI-TOF) *m/z*: [M+H]<sup>+</sup> calcd for C<sub>15</sub>H<sub>12</sub>Cl<sub>2</sub>N: 276.0341, found: 276.0340.

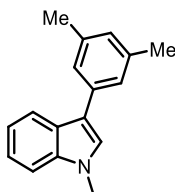

3s

**3-(3,5-dimethylphenyl)-1-methyl-1H-indole (3s)** as a yellow solid (15.0 mg, 64% yield). Purification condition (hexane: ethyl acetate = 20: 1). <sup>1</sup>H NMR (500 MHz, CDCl<sub>3</sub>) δ 7.95 (dt, *J* = 8.2, 1.0 Hz, 1H), 7.35 (d, *J* = 8.2 Hz, 1H), 7.30 – 7.25 (m, 3H), 7.21 (s, 1H), 7.20 – 7.17 (m, 1H), 6.92 (s, 1H), 3.82 (s, 3H), 2.38 (s, 6H); <sup>13</sup>C NMR (125 MHz, CDCl<sub>3</sub>) δ 138.28, 137.47, 135.54, 127.54, 126.60, 126.26, 125.26, 121.92, 120.13, 119.78, 116.84, 109.53, 32.94, 21.57; HRMS (ESI-TOF) *m/z*: [M+H]<sup>+</sup> calcd for C<sub>17</sub>H<sub>18</sub>N: 236.1434, found: 236.1435.

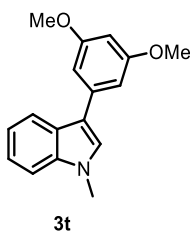

**3-(3,5-dimethoxyphenyl)-1-methyl-1H-indole (3t)** as a yellow oil (15.5 mg, 58% yield). **L23** was used instead of **L18**. Purification condition (hexane: ethyl acetate = 20: 1).  $^1\text{H}$  NMR (500 MHz,  $\text{CDCl}_3$ )  $\delta$  7.95 (dt,  $J = 8.1, 1.0$  Hz, 1H), 7.36 (dt,  $J = 8.1, 0.9$  Hz, 1H), 7.31 – 7.26 (m, 1H), 7.25 (s, 1H), 7.21 – 7.17 (m, 1H), 6.82 (d,  $J = 2.3$  Hz, 2H), 6.41 (t,  $J = 2.3$  Hz, 1H), 3.86 (s, 6H), 3.83 (s, 3H);  $^{13}\text{C}$  NMR (125 MHz,  $\text{CDCl}_3$ )  $\delta$  161.11, 137.62, 137.49, 126.84, 126.12, 122.09, 120.04, 120.02, 116.70, 109.65, 105.47, 98.01, 55.45, 32.98; HRMS (ESI-TOF)  $m/z$ :  $[\text{M}+\text{H}]^+$  calcd for  $\text{C}_{17}\text{H}_{18}\text{NO}_2$ : 268.1332, found: 268.1325.

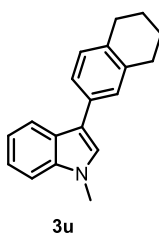

**1-methyl-3-(5,6,7,8-tetrahydronaphthalen-2-yl)-1H-indole (3u)** as a yellow oil (17.0 mg, 65% yield). Purification condition (hexane: ethyl acetate = 20: 1).  $^1\text{H}$  NMR (500 MHz,  $\text{CDCl}_3$ )  $\delta$  7.92 (d,  $J = 8.0$  Hz, 1H), 7.39 (dd,  $J = 7.8, 1.9$  Hz, 1H), 7.37 – 7.32 (m, 2H), 7.29 – 7.24 (m, 1H), 7.20 – 7.15 (m, 2H), 7.13 (d,  $J = 7.8$  Hz, 1H), 3.81 (s, 3H), 2.86 – 2.79 (m, 4H), 1.86 – 1.82 (m, 4H);  $^{13}\text{C}$  NMR (125 MHz,  $\text{CDCl}_3$ )  $\delta$  137.48, 134.81, 132.83, 129.58, 128.02, 126.33, 124.78, 121.89, 120.11, 119.73, 116.87, 109.50, 32.90, 29.68, 29.24, 23.45, 23.41; HRMS (ESI-TOF)  $m/z$ :  $[\text{M}+\text{H}]^+$  calcd for  $\text{C}_{19}\text{H}_{20}\text{N}$ : 262.1590, found: 262.1564.

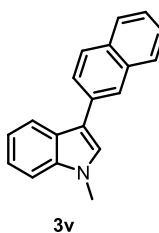

**1-methyl-3-(naphthalen-2-yl)-1H-indole (3v)**<sup>5</sup> as a yellow solid (20.0 mg, 78% yield). Purification condition (hexane: ethyl acetate = 20: 1).  $^1\text{H}$  NMR (500 MHz,  $\text{CDCl}_3$ )  $\delta$  8.11 (s, 1H), 8.06 (d,  $J = 7.9$  Hz, 1H), 7.90 – 7.82 (m, 3H), 7.79 (dd,  $J = 8.5, 1.8$  Hz, 1H), 7.49 – 7.46 (m, 1H), 7.45 – 7.41 (m, 1H), 7.38 (dt,  $J = 8.1, 0.9$  Hz, 1H), 7.34 (s, 1H), 7.32 – 7.29 (m, 1H), 7.25 – 7.23 (m, 1H), 3.85 (s, 3H);  $^{13}\text{C}$  NMR (125 MHz,  $\text{CDCl}_3$ )  $\delta$  137.66, 134.11, 133.24, 131.98, 128.30, 127.80, 127.76, 127.08, 126.51, 126.33, 126.18, 125.18, 124.97, 122.18, 120.13, 120.10, 116.67, 109.70, 32.99.

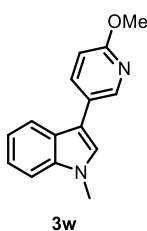

**3-(6-methoxypyridin-3-yl)-1-methyl-1H-indole (3w)** as a yellow oil (5.7 mg, 27% yield). **L24** was used instead of **L18**. Purification condition (hexane: ethyl acetate = 10: 1).  $^1\text{H}$  NMR (500 MHz,  $\text{CDCl}_3$ )  $\delta$  8.44 (dd,  $J = 2.5, 0.8$  Hz, 1H), 7.86 – 7.82 (m, 2H), 7.38 (dt,  $J = 8.2, 0.9$  Hz, 1H), 7.31 – 7.28 (m, 1H), 7.21 – 7.18 (m, 1H), 7.18 (s, 1H), 6.84 (dd,  $J = 8.5, 0.8$  Hz, 1H), 3.99 (s, 3H), 3.84 (s, 3H);  $^{13}\text{C}$  NMR (125 MHz,  $\text{CDCl}_3$ )  $\delta$  162.57, 144.88, 138.01, 137.39, 126.17, 124.81, 122.21, 120.06, 119.54, 113.09, 110.87, 109.68, 53.53, 33.00; HRMS (ESI-TOF)  $m/z$ :  $[\text{M}+\text{H}]^+$  calcd for  $\text{C}_{15}\text{H}_{15}\text{N}_2\text{O}$ : 239.1179, found: 239.1177.

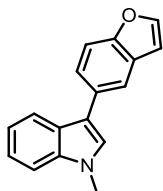

**3x**

**3-(benzofuran-5-yl)-1-methyl-1H-indole (3x)** as a yellow solid (9.5 mg, 36% yield). Purification condition (hexane: ethyl acetate = 20: 1).  $^1\text{H}$  NMR (500 MHz,  $\text{CDCl}_3$ )  $\delta$  7.95 (d,  $J = 8.0$  Hz, 1H), 7.84 (t,  $J = 1.2$  Hz, 1H), 7.64 (d,  $J = 2.2$  Hz, 1H), 7.58 – 7.55 (m, 2H), 7.37 (d,  $J = 8.2$  Hz, 1H), 7.30 – 7.27 (m, 1H), 7.22 – 7.17 (m, 2H), 6.80 (d,  $J = 2.1$  Hz, 1H), 3.83 (s, 3H);  $^{13}\text{C}$  NMR (125 MHz,  $\text{CDCl}_3$ )  $\delta$  153.75, 145.32, 137.41, 130.48, 128.00, 126.44, 126.42, 124.48, 122.00, 119.87, 119.84, 119.68, 117.03, 111.58, 109.57, 106.76, 32.92; HRMS (ESI-TOF)  $m/z$ :  $[\text{M}+\text{H}]^+$  calcd for  $\text{C}_{17}\text{H}_{14}\text{NO}$ : 248.1070, found: 248.1063.

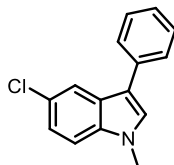

**3y**

**5-chloro-1-methyl-3-phenyl-1H-indole (3y)<sup>8</sup>** as a yellow oil (13.0 mg, 54% yield). Purification condition (hexane: ethyl acetate = 20: 1).  $^1\text{H}$  NMR (500 MHz,  $\text{CDCl}_3$ )  $\delta$  7.89 (d,  $J = 2.0$  Hz, 1H), 7.62 – 7.57 (m, 2H), 7.44 (t,  $J = 7.7$  Hz, 2H), 7.30 – 7.25 (m, 2H), 7.24 – 7.19 (m, 2H), 3.81 (s, 3H);  $^{13}\text{C}$  NMR (125 MHz,  $\text{CDCl}_3$ )  $\delta$  135.94, 135.03, 129.00, 127.83, 127.39, 127.19, 126.17, 125.94, 122.37, 119.47, 116.55, 110.71, 33.23.

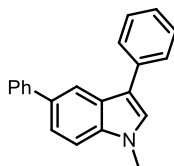

**3z**

**1-methyl-3,5-diphenyl-1H-indole (3z)** as a yellow solid (17.8 mg, 63% yield). **L23** was used instead of **L18**. Purification condition (hexane: ethyl acetate = 20: 1).  $^1\text{H}$  NMR (500 MHz,  $\text{CDCl}_3$ )  $\delta$  8.13 (d,  $J = 1.7$  Hz, 1H), 7.67 (td,  $J = 8.4, 1.3$  Hz, 4H), 7.52 (dd,  $J = 8.5, 1.7$  Hz, 1H), 7.47 – 7.39 (m, 5H), 7.33 – 7.26 (m, 2H), 7.24 (s, 1H), 3.84 (s, 3H);  $^{13}\text{C}$  NMR (125 MHz,  $\text{CDCl}_3$ )  $\delta$  142.75, 137.10, 135.64, 133.69, 128.95, 128.78, 127.63, 127.56, 127.32, 126.73, 126.51, 125.95, 122.01, 118.64, 117.27, 109.93, 33.13; HRMS (ESI-TOF)  $m/z$ :  $[\text{M}+\text{H}]^+$  calcd for  $\text{C}_{21}\text{H}_{18}\text{N}$ : 284.1434, found: 284.1426.

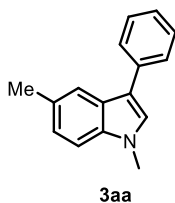

**1,5-dimethyl-3-phenyl-1H-indole (3aa)**<sup>5</sup> as a yellow solid (12.2 mg, 55% yield). **L22** was used instead of **L18**. Purification condition (hexane: ethyl acetate = 20: 1). <sup>1</sup>H NMR (500 MHz, CDCl<sub>3</sub>) δ 7.72 (s, 1H), 7.65 – 7.63 (m, 2H), 7.44 – 7.41 (m, 2H), 7.27 – 7.23 (m, 2H), 7.18 (s, 1H), 7.10 (dd, *J* = 8.4, 1.6 Hz, 1H), 3.80 (s, 3H), 2.48 (s, 3H); <sup>13</sup>C NMR (125 MHz, CDCl<sub>3</sub>) δ 135.97, 135.91, 129.24, 128.78, 127.38, 126.71, 126.40, 125.64, 123.63, 119.59, 116.20, 109.29, 32.98, 21.67.

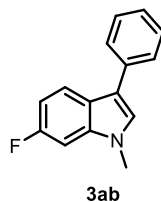

**6-fluoro-1-methyl-3-phenyl-1H-indole (3ab)**<sup>7</sup> as a yellow solid (11.3 mg, 50% yield). **L22** was used instead of **L18**. Purification condition (hexane: ethyl acetate = 20: 1). <sup>1</sup>H NMR (500 MHz, CDCl<sub>3</sub>) δ 7.83 (dd, *J* = 8.7, 5.3 Hz, 1H), 7.61 (dd, *J* = 8.1, 1.3 Hz, 2H), 7.43 (t, *J* = 7.8 Hz, 2H), 7.30 – 7.25 (m, 1H), 7.18 (s, 1H), 7.01 (dd, *J* = 9.7, 2.3 Hz, 1H), 6.97 – 6.91 (m, 1H), 3.76 (s, 3H); <sup>13</sup>C NMR (125 MHz, CDCl<sub>3</sub>) δ 159.99 (d, *J* = 238.3 Hz), 137.56 (d, *J* = 11.8 Hz), 135.25, 128.88, 127.32, 126.75, 126.01, 122.72, 120.85 (d, *J* = 10.1 Hz), 116.97, 108.59 (d, *J* = 24.3 Hz), 95.95 (d, *J* = 26.0 Hz), 33.07; <sup>19</sup>F NMR (470 MHz, CDCl<sub>3</sub>) δ -120.51 – 120.57 (m).

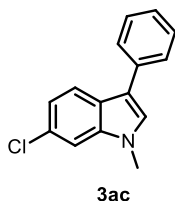

**6-chloro-1-methyl-3-phenyl-1H-indole (3ac)**<sup>7</sup> as a yellow solid (7.7 mg, 32% yield). Purification condition (hexane: ethyl acetate = 20: 1). <sup>1</sup>H NMR (500 MHz, CDCl<sub>3</sub>) δ 7.82 (d, *J* = 8.5 Hz, 1H), 7.60 (d, *J* = 6.9 Hz, 2H), 7.43 (t, *J* = 7.6 Hz, 2H), 7.34 (d, *J* = 1.9 Hz, 1H), 7.28 (t, *J* = 7.4 Hz, 1H), 7.19 (s, 1H), 7.14 (dd, *J* = 8.5, 1.9 Hz, 1H), 3.77 (s, 3H); <sup>13</sup>C NMR (125 MHz, CDCl<sub>3</sub>) δ 137.88, 135.07, 128.90, 128.01, 127.32, 127.13, 126.08, 124.72, 120.90, 120.55, 116.96, 109.63, 33.04.

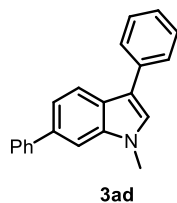

**1-methyl-3,6-diphenyl-1H-indole (3ad)** as a yellow solid (20.1 mg, 71% yield). Purification condition (hexane: ethyl acetate = 20: 1). <sup>1</sup>H NMR (500 MHz, CDCl<sub>3</sub>) δ 7.99 (d, *J* = 8.3 Hz, 1H), 7.70 – 7.66 (m, 4H), 7.54 (d, *J* = 1.5 Hz, 1H), 7.45 (td, *J* = 8.4, 7.9, 6.8 Hz, 5H), 7.36 – 7.31 (m, 1H), 7.29 – 7.26 (m, 1H), 7.23 (d, *J* = 10.5 Hz, 1H), 3.84 (s, 3H); <sup>13</sup>C NMR (125 MHz, CDCl<sub>3</sub>) δ 142.35, 138.06, 135.63, 135.61, 128.86, 128.81, 127.53, 127.33, 127.26, 126.79, 125.84, 125.50, 120.25, 119.88, 116.69, 108.15, 33.00; HRMS (ESI-TOF) *m/z*: [M+H]<sup>+</sup> calcd for C<sub>21</sub>H<sub>18</sub>N: 284.1434, found: 284.1429.

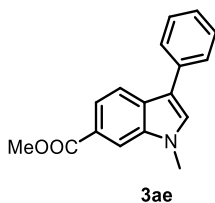

**methyl 1-methyl-3-phenyl-1H-indole-6-carboxylate (3ae)**<sup>5</sup> as a yellow solid (9.6 mg, 36% yield). **L24** was used instead of **L18**. Purification condition (hexane: ethyl acetate = 10: 1). <sup>1</sup>H NMR (500 MHz, CDCl<sub>3</sub>) δ 8.13 (d, *J* = 1.5 Hz, 1H), 7.94 (d, *J* = 8.4 Hz, 1H), 7.86 (dd, *J* = 8.4, 1.5 Hz, 1H), 7.63 (dd, *J* = 8.1, 1.4 Hz, 2H), 7.45 (t, *J* = 7.7 Hz, 2H), 7.37 (s, 1H), 7.32 – 7.27 (m, 1H), 3.96 (s, 3H), 3.89 (s, 3H); <sup>13</sup>C NMR (125 MHz, CDCl<sub>3</sub>) δ 168.16, 136.88, 134.93, 129.78, 129.57, 128.93, 127.40, 126.18, 123.57, 120.92, 119.53, 117.17, 112.12, 52.11, 33.19.

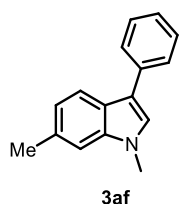

**1,6-dimethyl-3-phenyl-1H-indole (3af)**<sup>5</sup> as a yellow oil (15.2 mg, 69% yield). **L22** was used instead of **L18**. Purification condition (hexane: ethyl acetate = 10: 1). <sup>1</sup>H NMR (500 MHz, CDCl<sub>3</sub>) δ 7.82 (d, *J* = 8.2 Hz, 1H), 7.65 (dd, *J* = 7.9, 1.4 Hz, 2H), 7.42 (t, *J* = 7.6 Hz, 2H), 7.26 – 7.23 (m, 1H), 7.16 (s, 1H), 7.15 (s, 1H), 7.02 (dd, *J* = 8.1, 1.5 Hz, 1H), 3.79 (s, 3H), 2.52 (s, 3H); <sup>13</sup>C NMR (125 MHz, CDCl<sub>3</sub>) δ 138.03, 135.97, 131.96, 128.84, 127.31, 126.09, 125.70, 124.12, 121.79, 119.75, 116.63, 109.64, 32.93, 21.97.

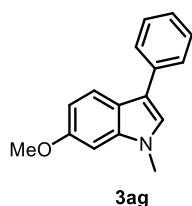

**6-methoxy-1-methyl-3-phenyl-1H-indole (3ag)**<sup>7</sup> as a yellow solid (14.2 mg, 60% yield). **L23** was used instead of **L18**. Purification condition (hexane: ethyl acetate = 10: 1). <sup>1</sup>H NMR (500 MHz, CDCl<sub>3</sub>) δ 7.81 (d, *J* = 8.7 Hz, 1H), 7.66 – 7.61 (m, 2H), 7.42 (t, *J* = 7.8 Hz, 2H), 7.28 – 7.24 (m, 1H), 7.12 (s, 1H), 6.86 (dd, *J* = 8.7, 2.3 Hz, 1H), 6.80 (d, *J* = 2.2 Hz, 1H), 3.90 (s, 3H), 3.77 (s, 3H); <sup>13</sup>C NMR (125 MHz, CDCl<sub>3</sub>) δ 156.50, 138.25, 135.74, 128.80, 127.19, 125.70, 125.41, 120.72, 120.50, 116.68, 109.77, 92.96, 55.77, 32.98.

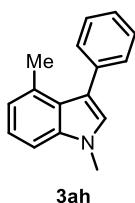

**1,4-dimethyl-3-phenyl-1H-indole (3ah)**<sup>5</sup> as a yellow oil (12.6 mg, 57% yield). **L22** was used instead of **L18**. Purification condition (hexane: ethyl acetate = 20: 1). <sup>1</sup>H NMR (500 MHz, CDCl<sub>3</sub>) δ 7.46 – 7.41 (m, 2H), 7.40 – 7.34 (m, 2H), 7.34 – 7.29 (m, 1H), 7.21 (d, *J* = 8.1 Hz, 1H), 7.17 (dd, *J* = 8.3, 6.9 Hz, 1H), 6.97 (s, 1H), 6.88 (d, *J* = 6.9 Hz, 1H), 3.80 (s, 3H), 2.29 (s, 3H); <sup>13</sup>C NMR (125 MHz, CDCl<sub>3</sub>) δ 137.03, 131.43, 130.74, 127.75, 127.61, 126.27, 125.62, 121.93, 121.22, 118.18, 107.22, 32.93, 20.89.

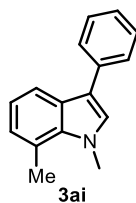

**1,7-dimethyl-3-phenyl-1H-indole (3ai)**<sup>5</sup> as a white solid (8.4 mg, 38% yield). **L22** was used instead of **L18**. Purification condition (hexane: ethyl acetate = 20: 1). <sup>1</sup>H NMR (500 MHz, CDCl<sub>3</sub>) δ 7.76 (d, *J* = 8.0 Hz, 1H), 7.62 (d, *J* = 7.6 Hz, 2H), 7.43 (t, *J* = 7.6 Hz, 2H), 7.30 – 7.25 (m, 1H), 7.09 (s, 1H), 7.04 (t, *J* = 7.5 Hz, 1H), 6.96 (d, *J* = 7.0 Hz, 1H), 4.10 (s, 3H), 2.80 (s, 3H); <sup>13</sup>C NMR (125 MHz, CDCl<sub>3</sub>) δ 136.11, 135.66, 128.76, 128.41, 127.64, 127.28, 125.77, 124.68, 121.60, 120.16, 118.00, 116.52, 37.03, 19.94.

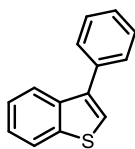

**3-phenylbenzo[b]thiophene (3aj)**<sup>5</sup> as a yellow oil (9.2 mg, 44% yield). Purification condition (hexane: ethyl acetate = 20: 1). <sup>1</sup>H NMR (500 MHz, CDCl<sub>3</sub>) δ 7.95 – 7.88 (m, 2H), 7.61 – 7.56 (m, 2H), 7.51 – 7.45 (m, 2H), 7.42 – 7.35 (m, 4H); <sup>13</sup>C NMR (125 MHz, CDCl<sub>3</sub>) δ 140.75, 138.16, 137.95, 136.07, 128.81, 128.79, 127.63, 124.49, 124.41, 123.49, 123.00.

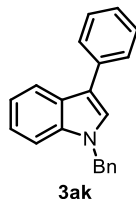

**1-benzyl-3-phenyl-1H-indole (3ak)**<sup>5</sup> as a white solid (15.0 mg, 53% yield). Purification condition (hexane: ethyl acetate = 20: 1). <sup>1</sup>H NMR (500 MHz, CDCl<sub>3</sub>) δ 8.00 – 7.95 (m, 1H), 7.70 – 7.64 (m, 2H), 7.43 (t, *J* = 7.7 Hz, 2H), 7.35 – 7.23 (m, 7H), 7.21 – 7.15 (m, 3H), 5.35 (s, 2H); <sup>13</sup>C NMR (125 MHz, CDCl<sub>3</sub>) δ 137.24, 137.11, 135.56, 128.89, 128.83, 127.78, 127.41, 126.94, 126.43, 126.01, 125.89, 122.21, 120.18, 120.10, 117.36, 110.09, 50.17.

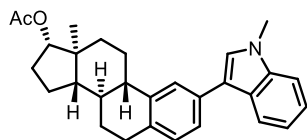

**(8*R*,9*S*,13*S*,14*S*,17*S*)-13-methyl-2-(1-methyl-1*H*-indol-3-yl)-7,8,9,11,12,13,14,15,16,17-decahydro-6*H*-cyclopenta[*a*]phenanthren-17-yl acetate (3al)** as a white solid (27.0 mg, 63% yield). <sup>1</sup>H NMR (500 MHz, CDCl<sub>3</sub>) δ 7.93 (d, *J* = 7.9 Hz, 1H), 7.61 (s, 1H), 7.43 (dd, *J* = 7.8, 1.8 Hz, 1H), 7.37 (d, *J* = 8.1 Hz, 1H), 7.29 (dd, *J* = 8.2, 6.9 Hz, 1H), 7.21 (s, 1H), 7.21 – 7.16 (m, 2H), 4.73 (t, *J* = 8.4 Hz, 1H), 3.84 (s, 3H), 2.97 – 2.90 (m, 2H), 2.43 (dt, *J* = 12.8, 3.6 Hz, 1H), 2.36 (td, *J* = 10.8, 3.9 Hz, 1H), 2.29 – 2.21 (m, 1H), 2.08 (s, 3H), 1.97 – 1.92 (m, 2H), 1.82 – 1.76 (m, 1H), 1.61 – 1.31 (m, 7H), 0.88 (s, 3H); <sup>13</sup>C NMR (125 MHz, CDCl<sub>3</sub>) δ 171.38, 140.59, 137.52, 134.32, 133.04, 129.56, 126.38, 124.96, 124.59, 121.97, 120.09, 119.85, 117.16, 109.59, 82.88, 50.08, 44.55,



43.02, 38.53, 37.08, 32.97, 29.41, 27.72, 27.42, 26.20, 23.43, 21.35, 12.21; HRMS (EI) m/z: [M]<sup>+</sup> calcd for C<sub>29</sub>H<sub>33</sub>NO<sub>2</sub>: 427.2506, found: 427.2511.

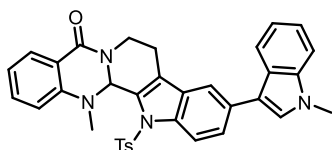

3am

**14-methyl-10-(1-methyl-1*H*-indol-3-yl)-13-tosyl-8,13,13b,14-tetrahydroindolo[2',3':3,4]pyrido[2,1-*b*]quinazolin-5(7*H*)-one (3am)** as a white solid (35.7 mg, 61% yield). <sup>1</sup>H NMR (500 MHz, CDCl<sub>3</sub>) δ 8.35 (d, *J* = 8.6 Hz, 1H), 8.12 (dd, *J* = 7.8, 1.6 Hz, 1H), 7.96 (d, *J* = 7.9 Hz, 1H), 7.89 (d, *J* = 8.2 Hz, 2H), 7.76 (d, *J* = 1.6 Hz, 1H), 7.74 (dd, *J* = 8.6, 1.8 Hz, 1H), 7.49 (td, *J* = 7.6, 1.6 Hz, 1H), 7.38 (d, *J* = 8.2 Hz, 1H), 7.32 – 7.25 (m, 4H), 7.21 (t, *J* = 7.5 Hz, 1H), 7.17 (t, *J* = 7.5 Hz, 1H), 7.07 (d, *J* = 8.0 Hz, 1H), 6.35 (s, 1H), 4.88 (dd, *J* = 12.7, 4.3 Hz, 1H), 3.84 (s, 3H), 3.12 (td, *J* = 12.2, 3.6 Hz, 1H), 3.00 – 2.94 (m, 1H), 2.83 – 2.76 (m, 1H), 2.39 (s, 3H), 2.20 (s, 3H); <sup>13</sup>C NMR (125 MHz, CDCl<sub>3</sub>) δ 164.57, 150.80, 145.13, 137.54, 135.91, 135.83, 133.21, 131.89, 129.60, 129.25, 129.09, 128.75, 127.16, 126.75, 126.19, 126.02, 124.06, 123.12, 122.99, 122.21, 120.58, 120.11, 119.68, 117.38, 116.25, 115.59, 109.77, 67.90, 38.42, 35.41, 33.01, 21.74, 20.98; HRMS (EI) m/z: [M]<sup>+</sup> calcd for C<sub>35</sub>H<sub>30</sub>N<sub>4</sub>O<sub>3</sub>S: 586.2033, found: 586.2029.

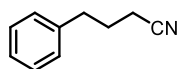

4

**4-phenylbutanenitrile (4)** as a colorless oil. <sup>1</sup>H NMR (500 MHz, CDCl<sub>3</sub>) δ 7.31 (t, *J* = 7.5 Hz, 2H), 7.23 (t, *J* = 7.4 Hz, 1H), 7.19 (d, *J* = 7.5 Hz, 2H), 2.78 (t, *J* = 7.5 Hz, 2H), 2.32 (t, *J* = 7.1 Hz, 2H), 2.02 – 1.96 (m, 2H).

## 6. References

1. (a) T. Nambara, S. Honma and S. Akiyama, *Chem. Pharm. Bull.*, 1970, **18**, 474; (b) S. Nahm and S. M. Weinreb, *Tetrahedron Lett.*, 1981, **22**, 3815; (c) O. Labeeuw, P. Phansavath and J. P. Genêt, *Tetrahedron Lett.*, 2004, **45**, 7107; (d) H. Y. Li, B. Ma, Q. S. Liu, M. L. Wang, Z. Y. Wang, H. Xu, L. J. Li, X. Wang and H. X. Dai, *Angew. Chem. Int. Ed.*, 2020, **59**, 14388.
2. T. Nishimura, Y. Nishiguchi, Y. Maeda and S. Uemura, *J. Org. Chem.*, 2004, **69**, 5342.
3. M. L. Wang, H. Xu, H. Y. Li, B. Ma, Z. Yu. Wang, X. Wang and H. X. Dai, *Organic Letters*, 2021, **23**, 2147.
4. (a) A. Kong, X. Han and X. Lu, *Org. Lett.*, 2006, **8**, 1339; (b) G. Chelucci, G. A. Pinna and G. Pinna, *Eur. J. Org. Chem.*, 2014, **18**, 3802.
5. J. Rodriguez, A. Zeineddine, E. D. S. Carrizo, K. Miqueu, N. Saffon-Merceron, A. Amgoune, and D. Bourissou, *Chem. Sci.*, 2019, **10**, 7183.

6. R. J. Phipps, N. P. Grimster and M. J. Gaunt, *J. Am. Chem. Soc.*, 2008, **130**, 8172.
7. R. Gattu, S. Bhattacharjee, K. Mahato and A. T. Khan, *Org. Biomol. Chem.*, 2018, **16**, 3760.
8. G. Yao, Z. X. Zhang, C. B. Zhang, H. H. Xu and R. Y. Tang, *Molecules*, 2018, **23**, 3317.
9. I. Medina - Mercado, E. O. Asomoza - Solís, E. Martínez - González, V. M. Ugalde - Saldívar, L. G. Ledesma - Olvera, J. E. Barquera - Lozada, V. Gómez - Vidales, J. Barroso - Flores, B. A. Frontana - Uribe and S. Porcel, *Chem. Eur. J.*, 2020, **26**, 634.
10. M. Kihara, Y. Iwai and Y. Nagao, *Heterocycles*, **1995**, 41, 2279.

# 7. <sup>1</sup>H, <sup>13</sup>C and <sup>19</sup>F NMR spectra

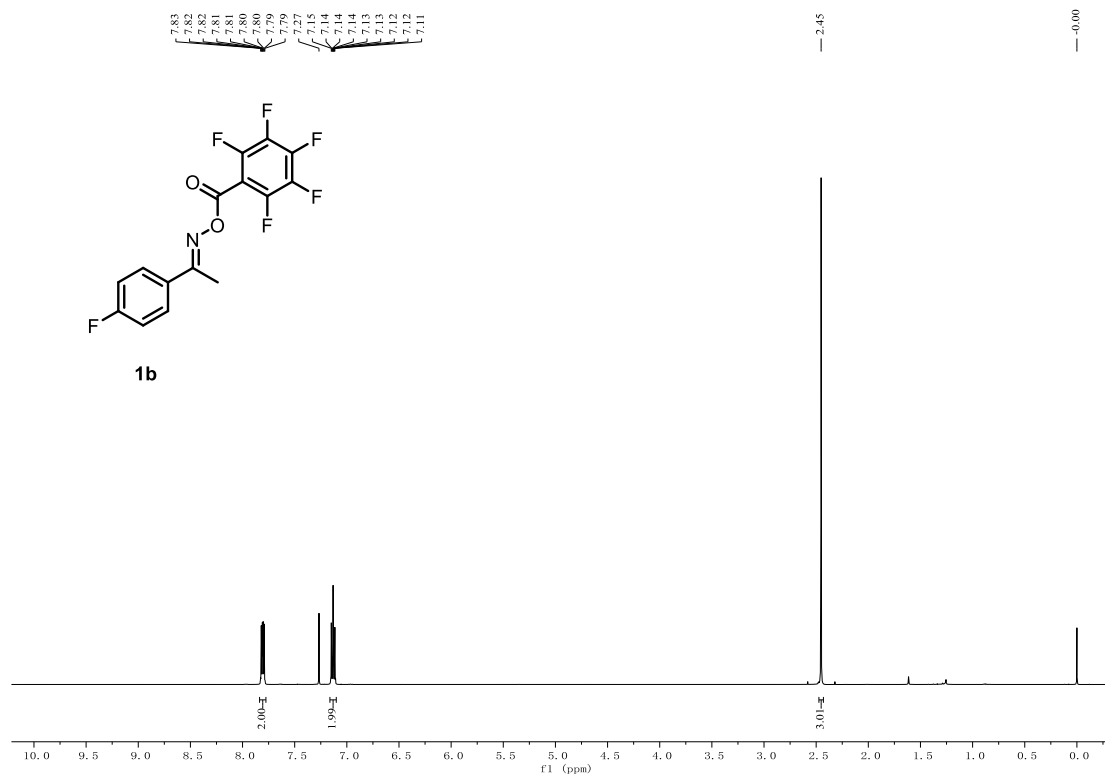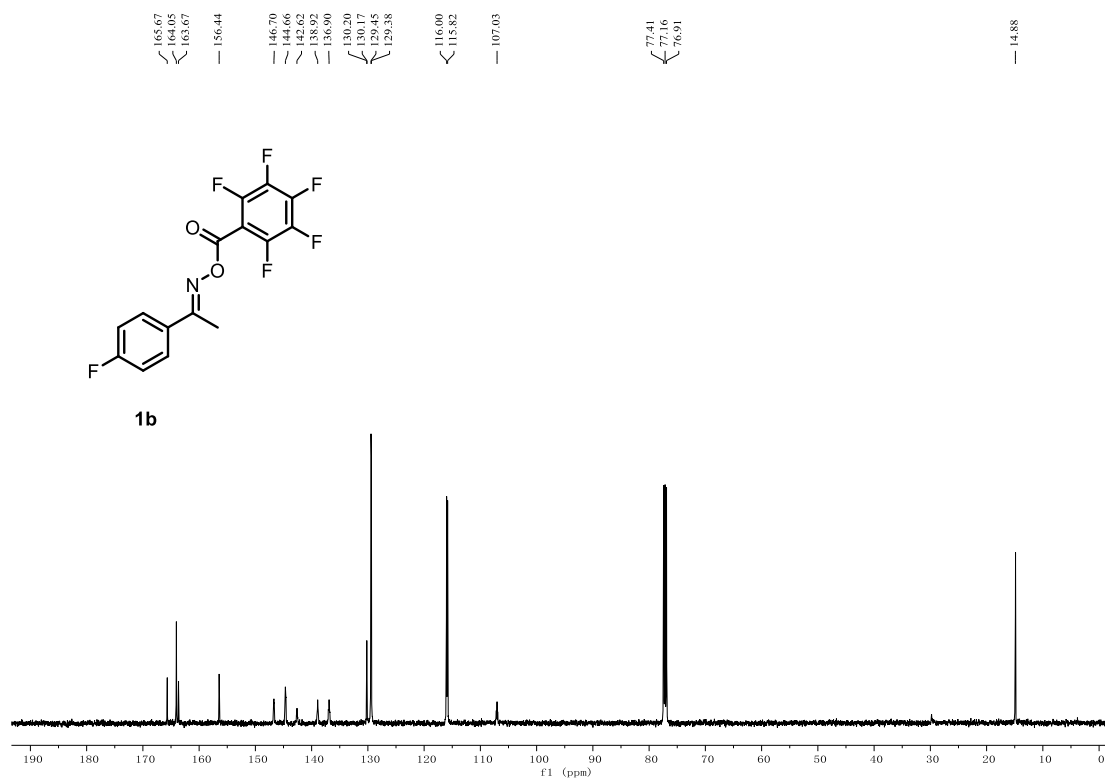

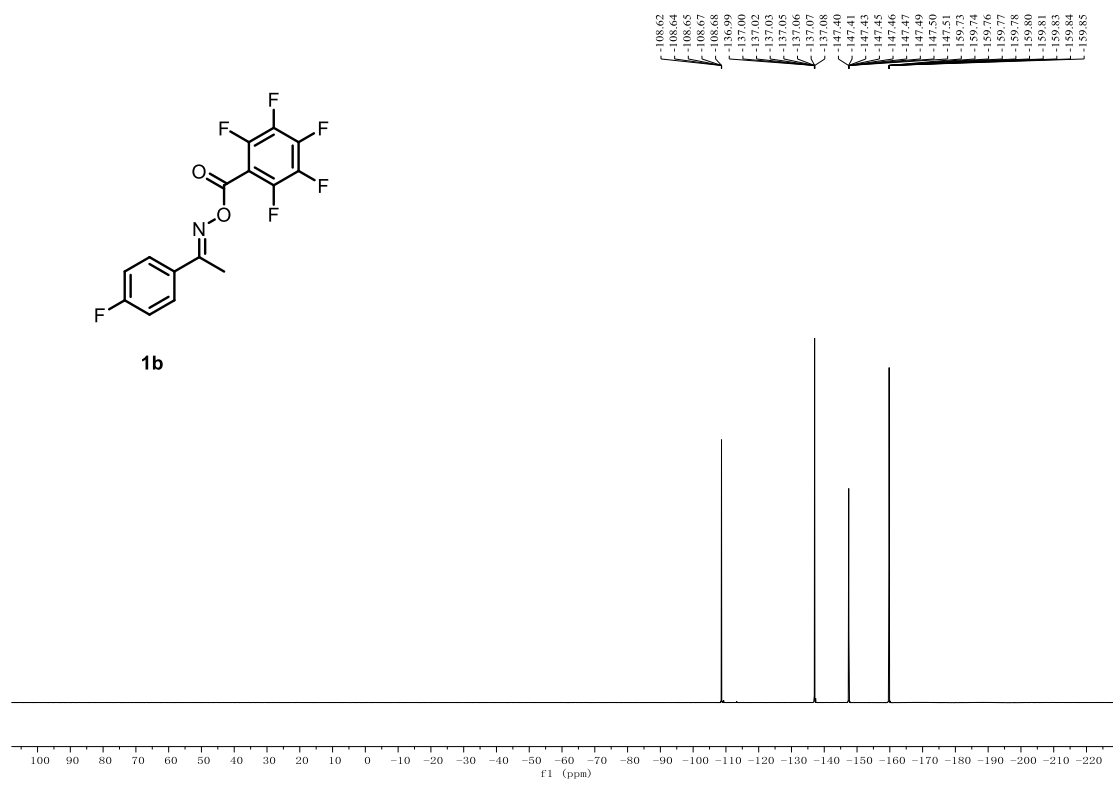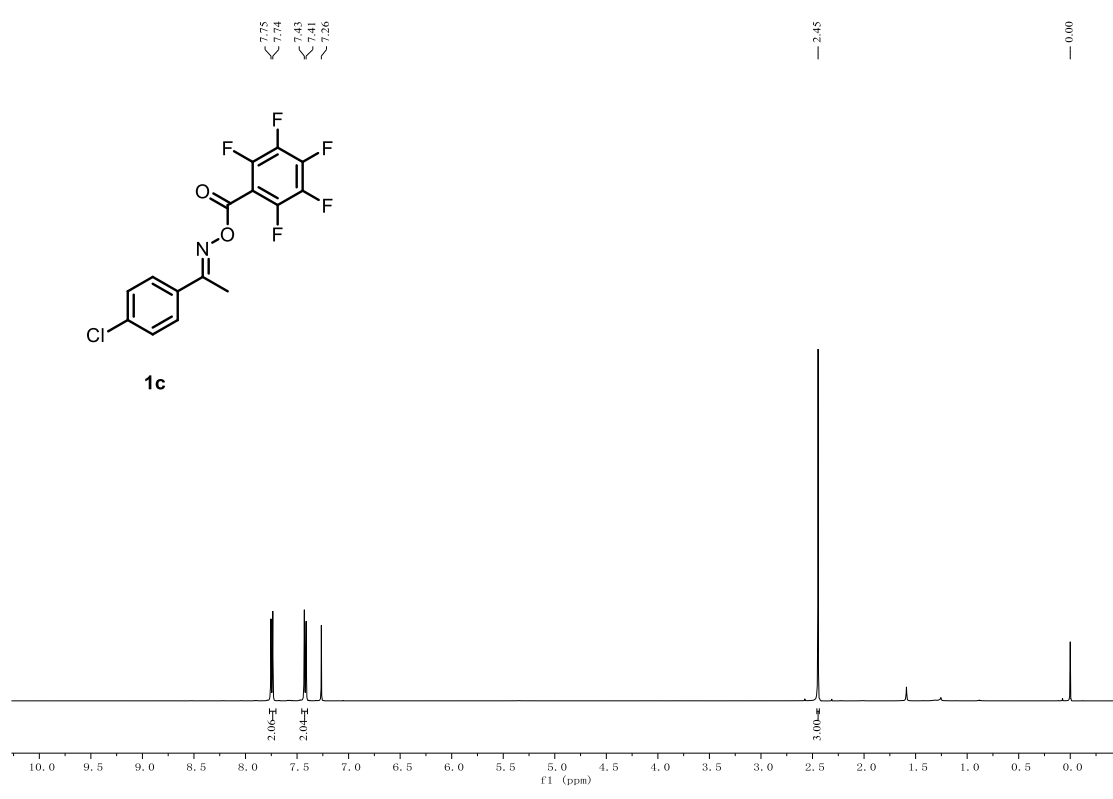

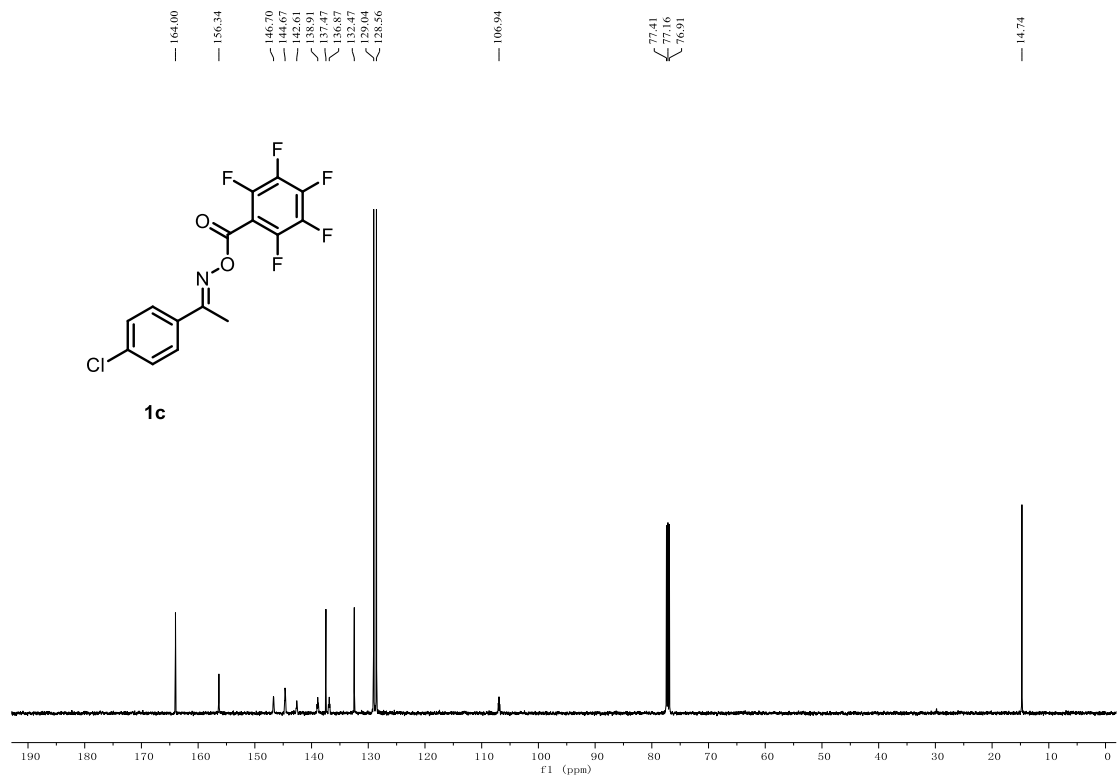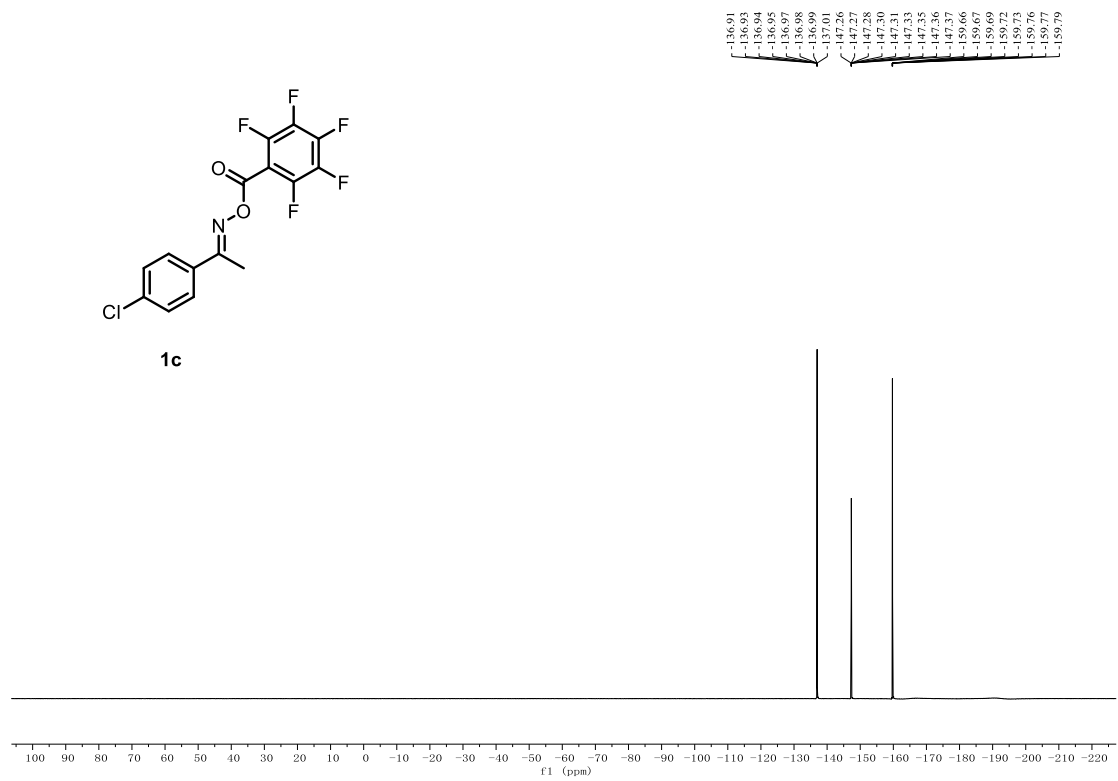

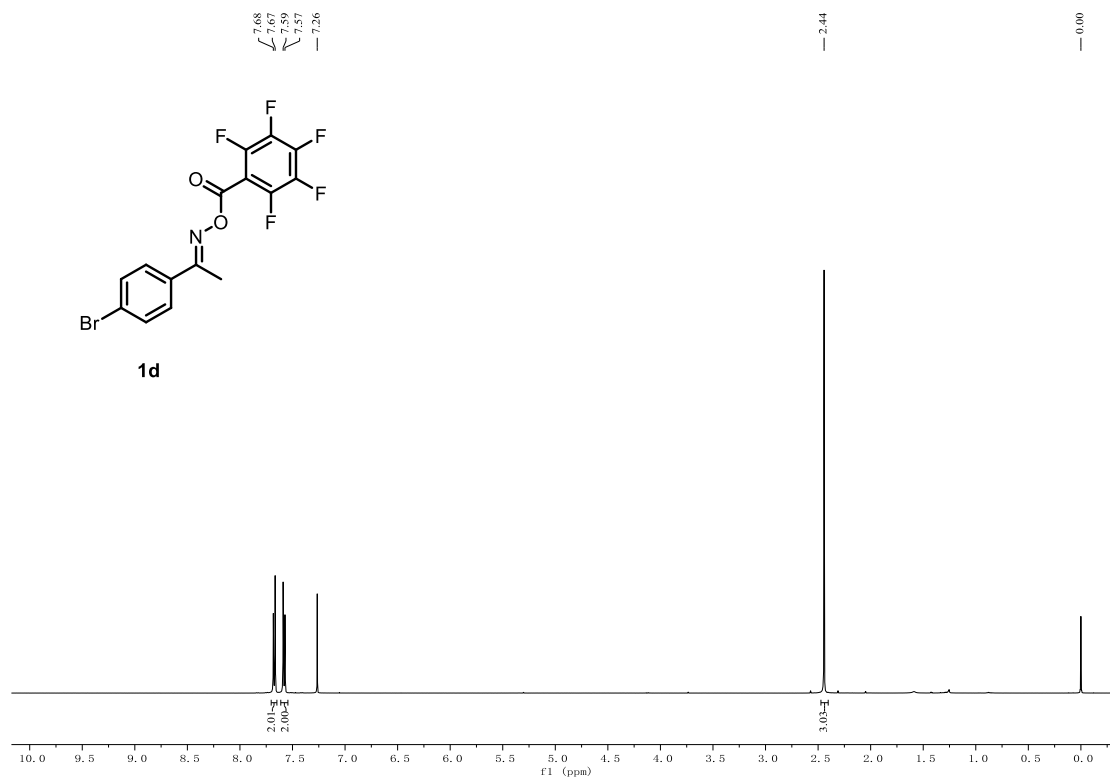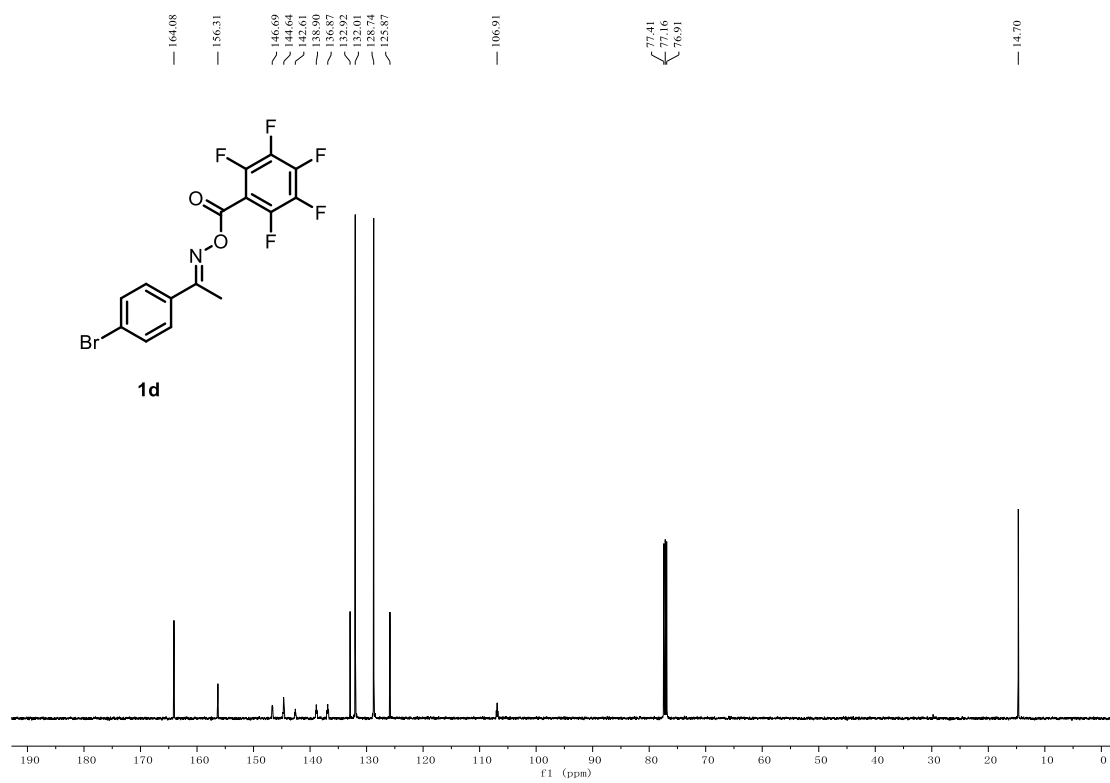

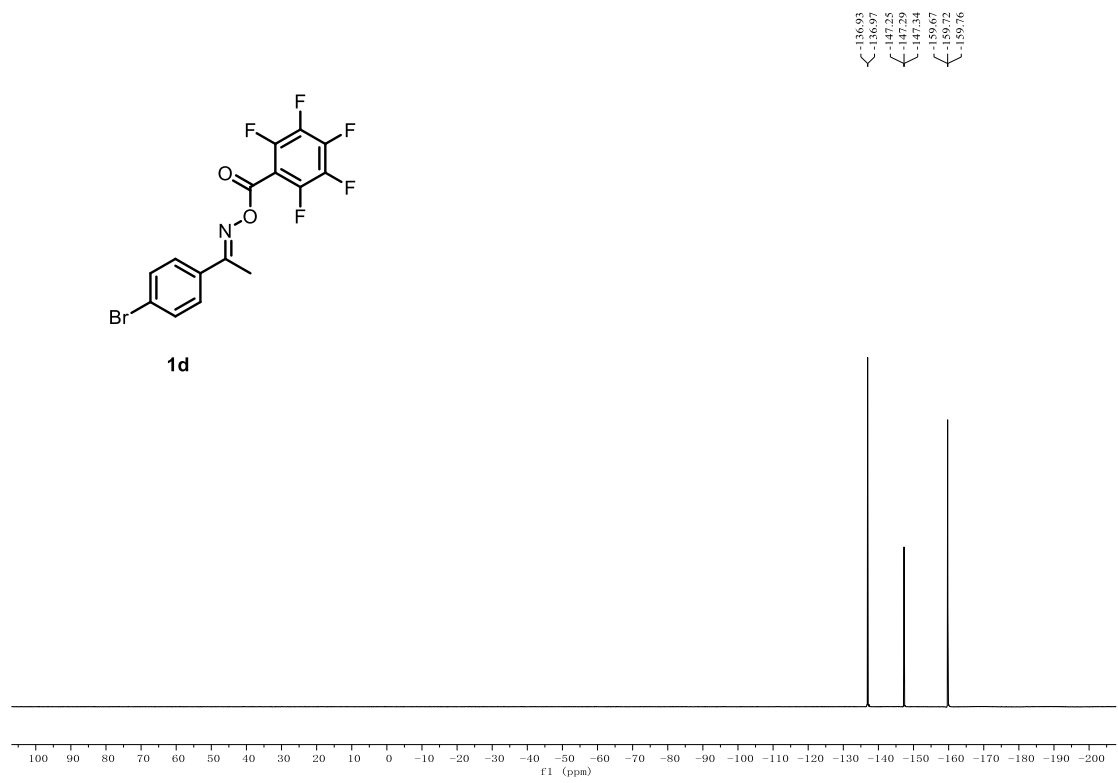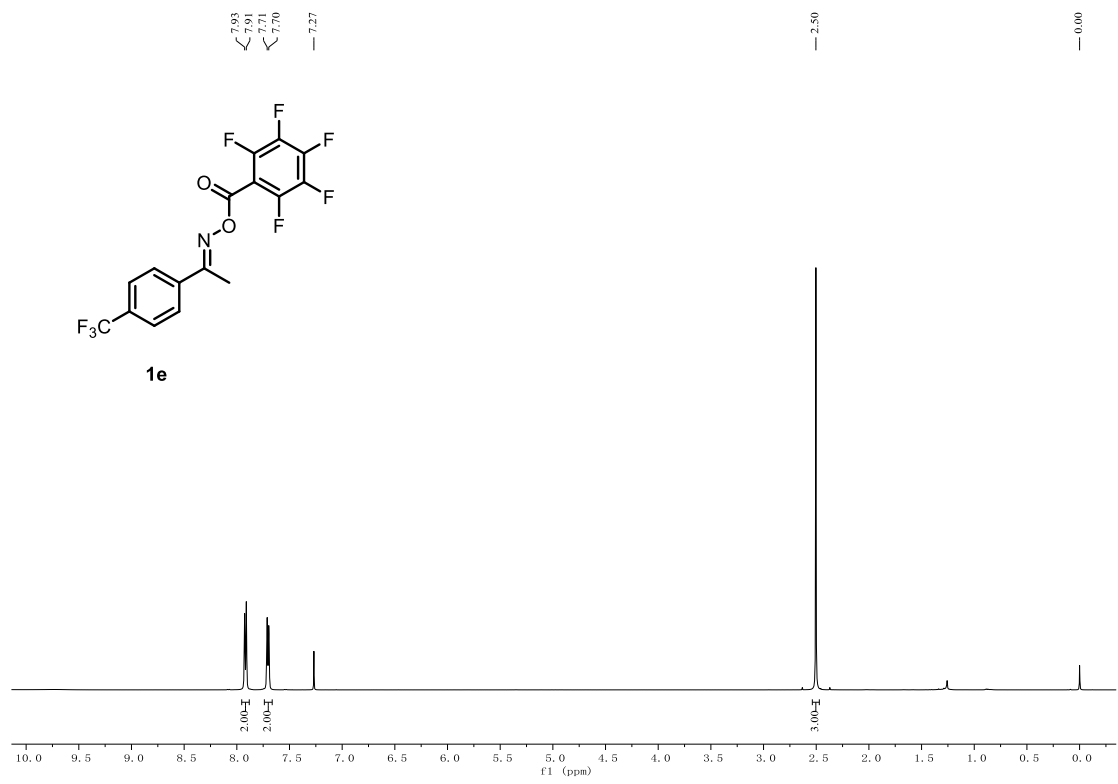

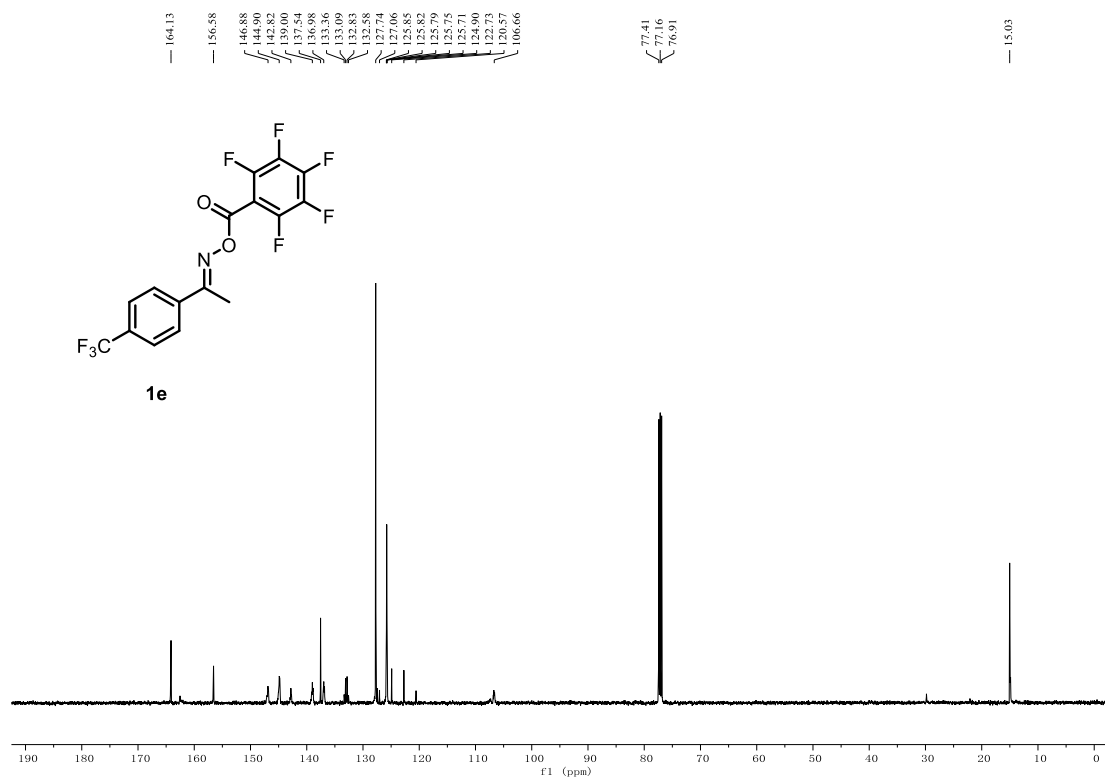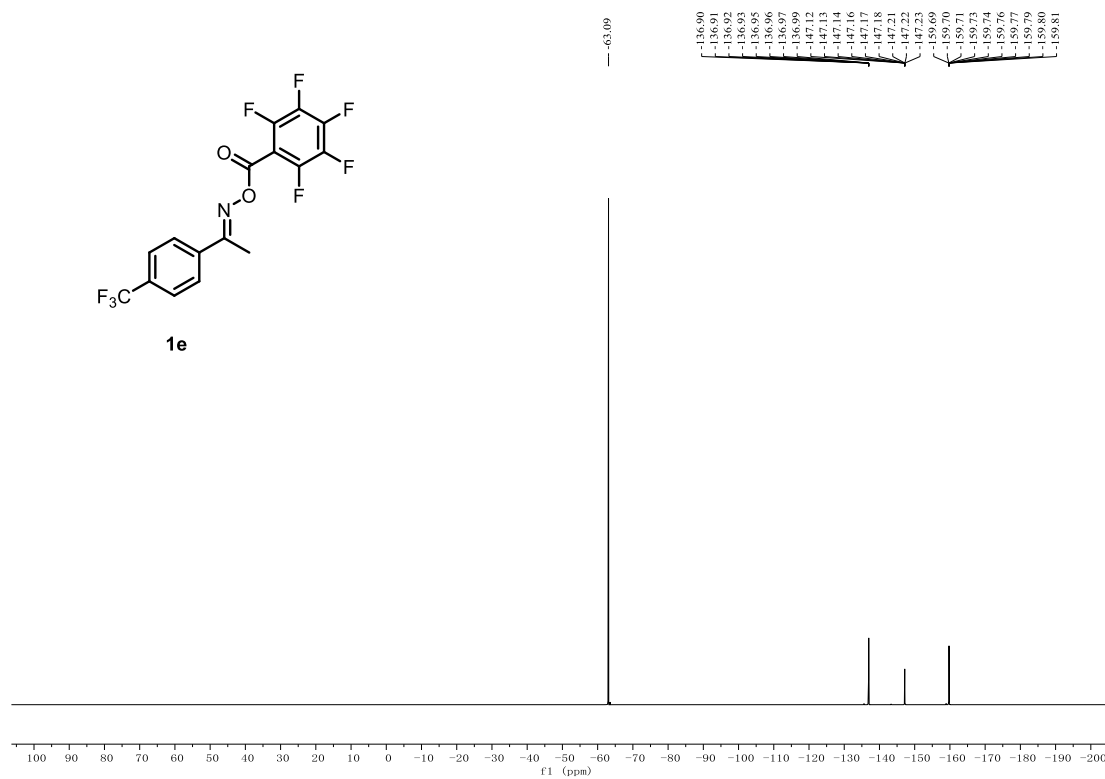



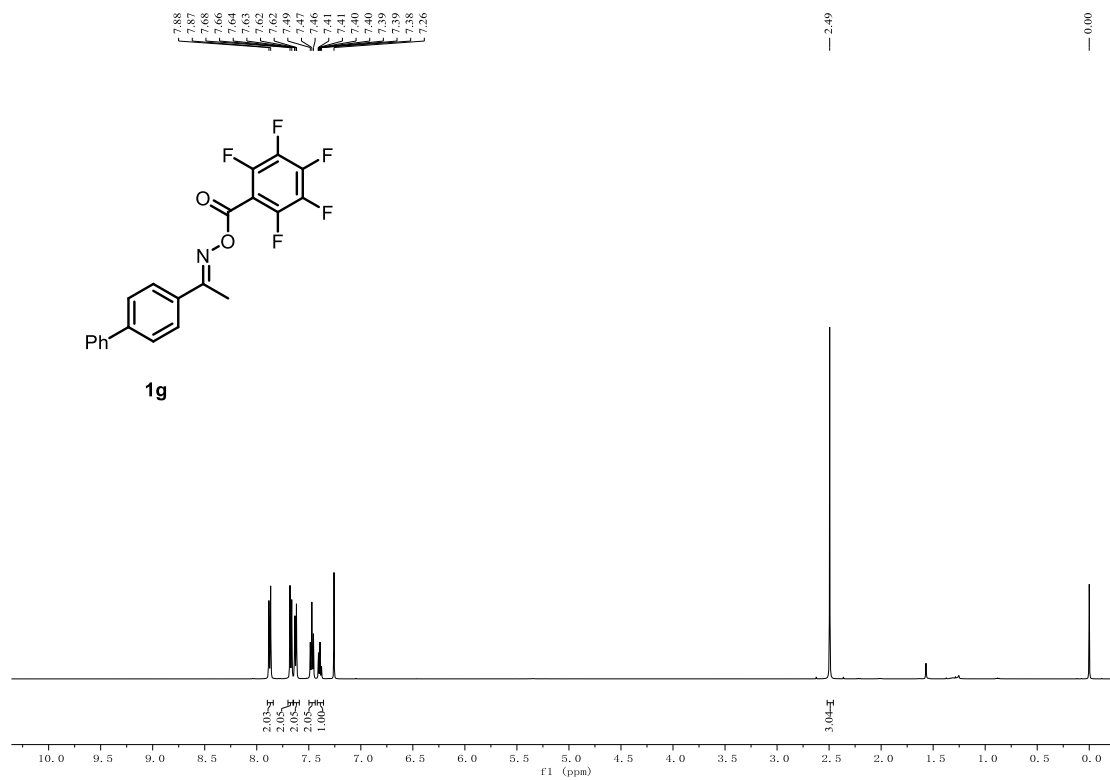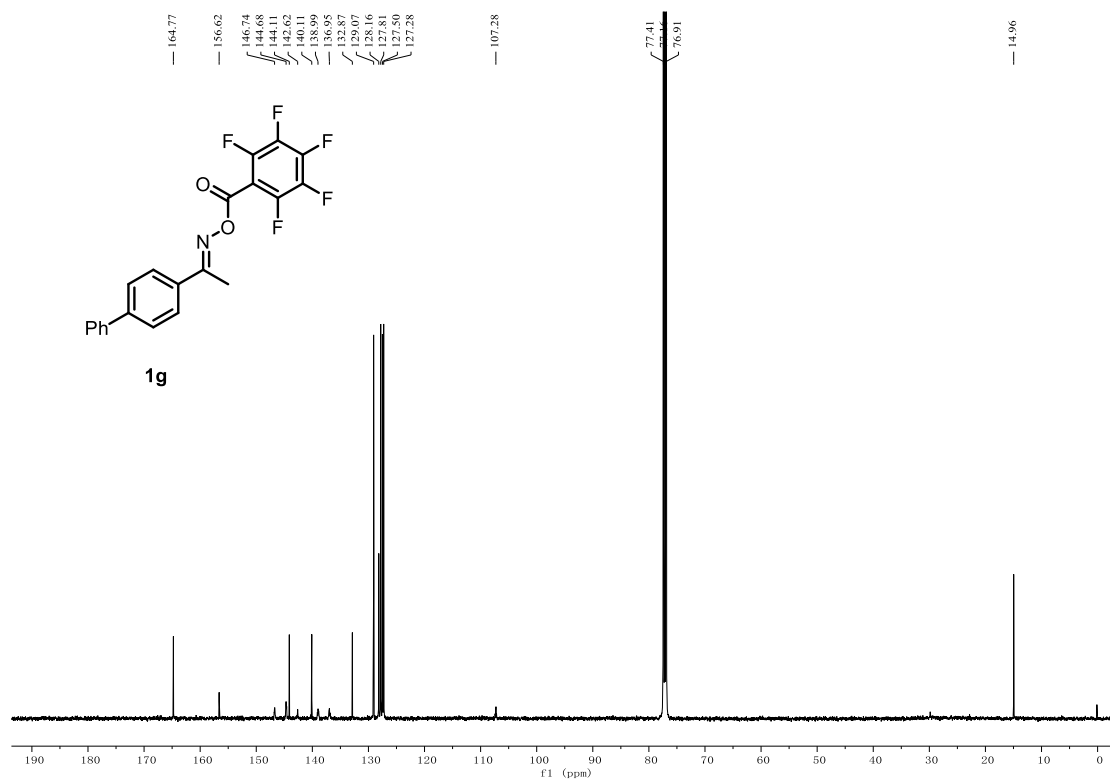

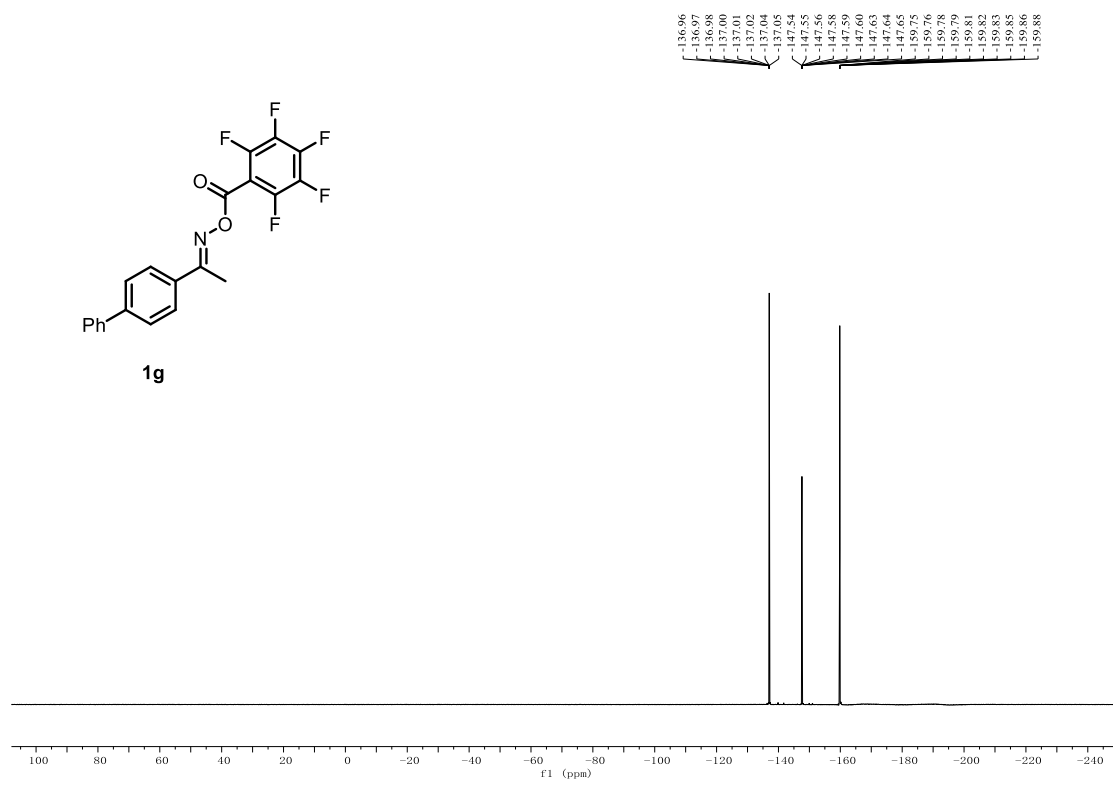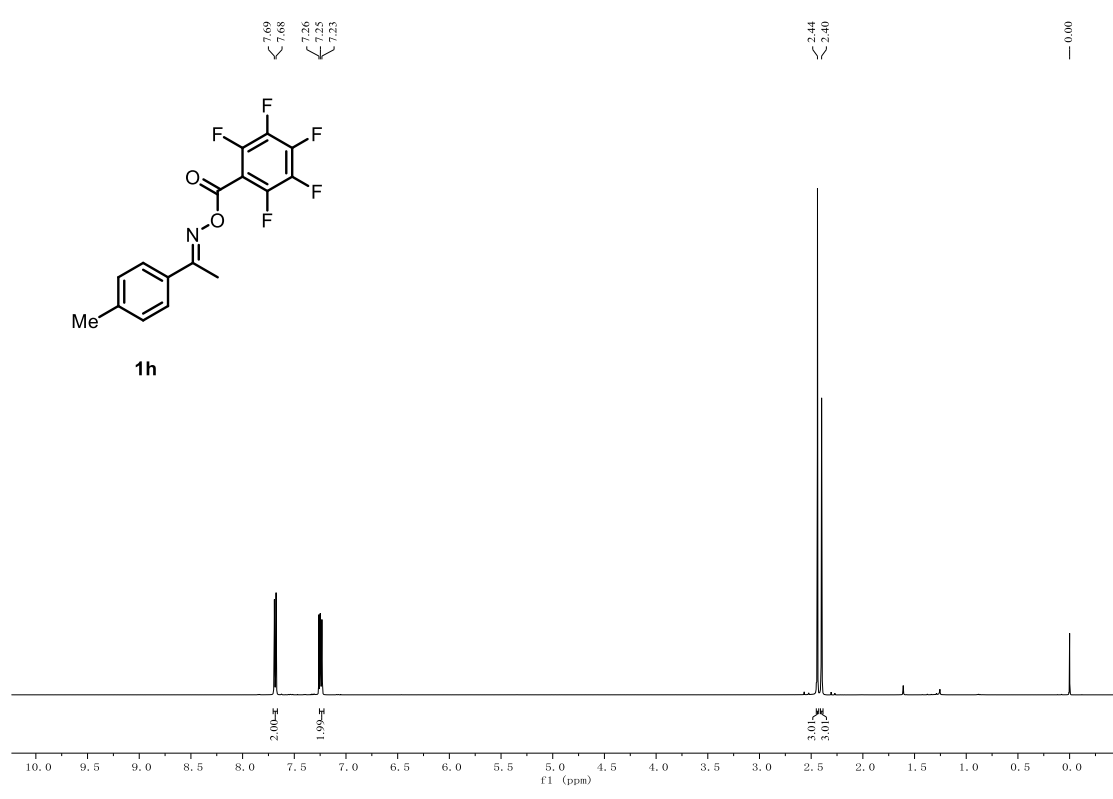

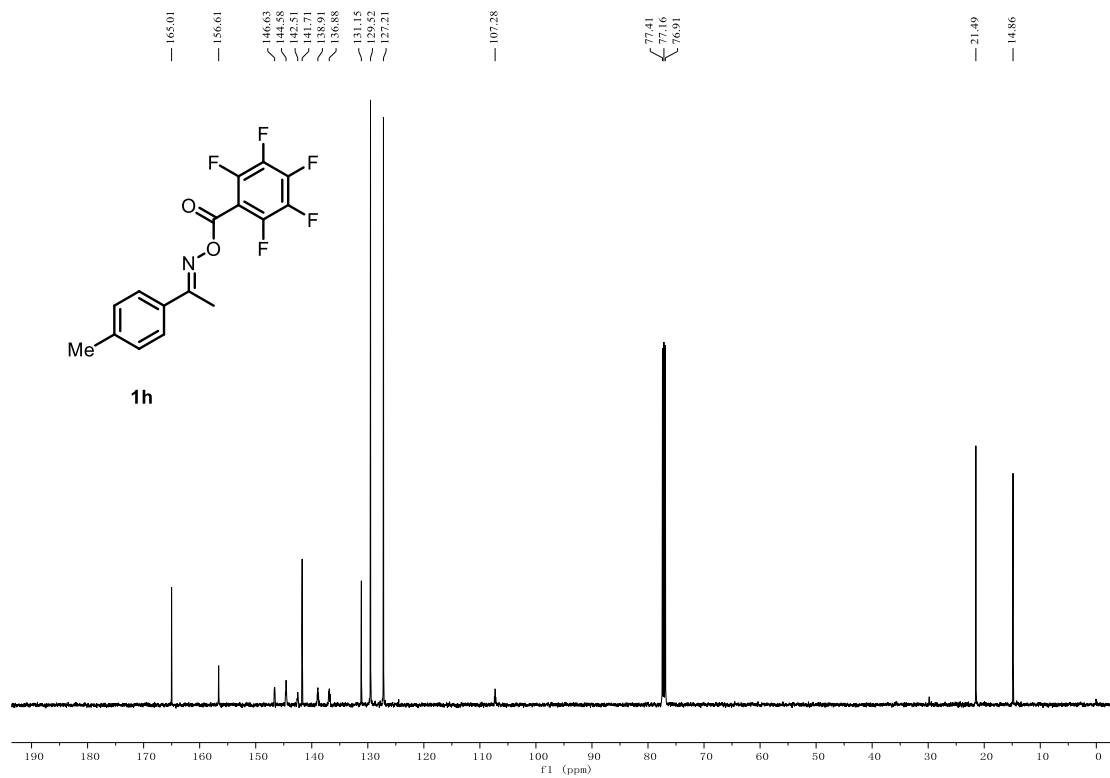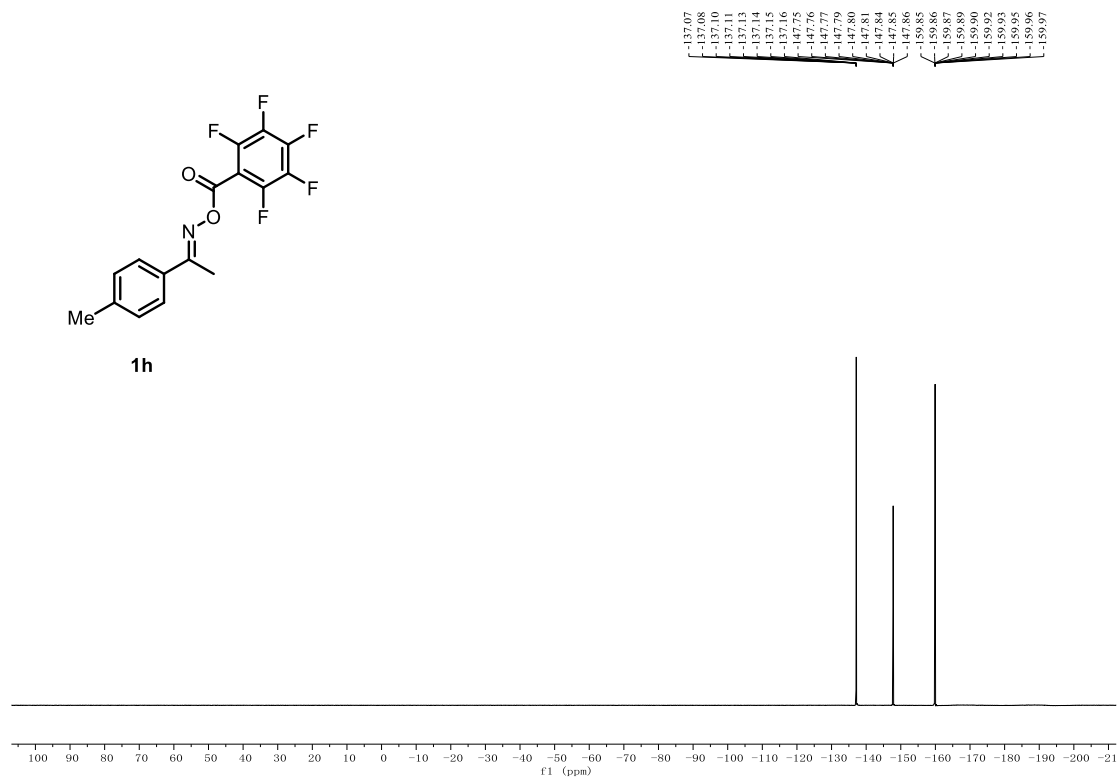

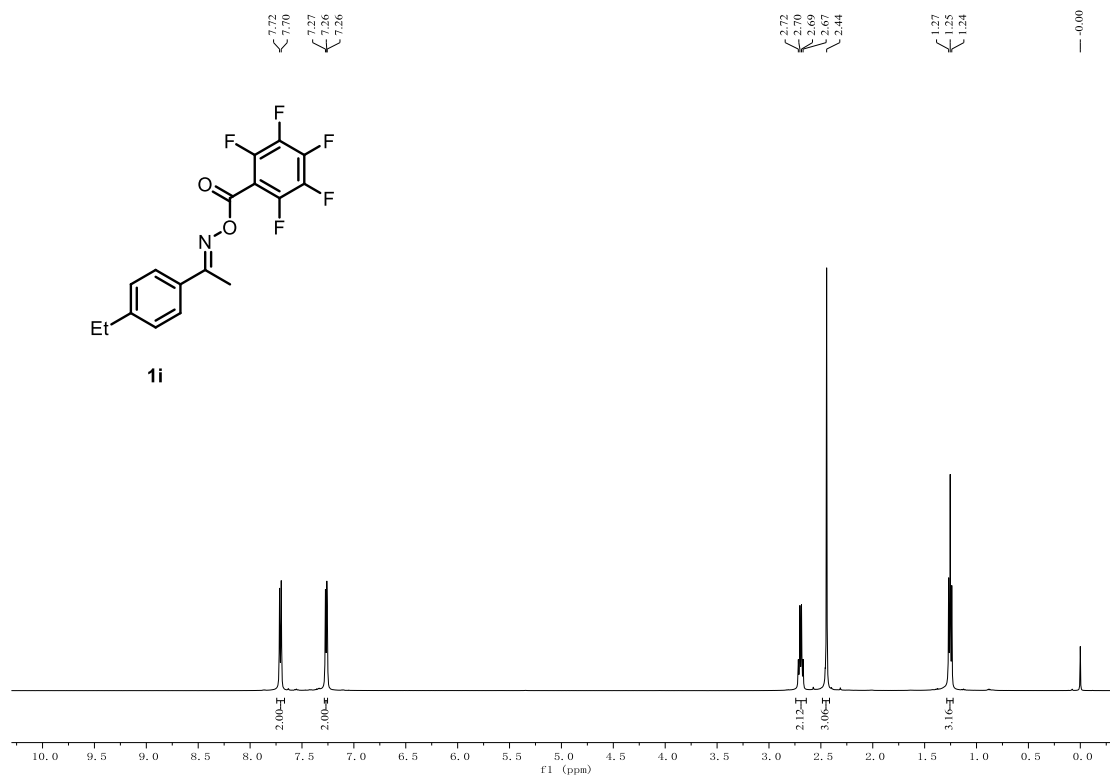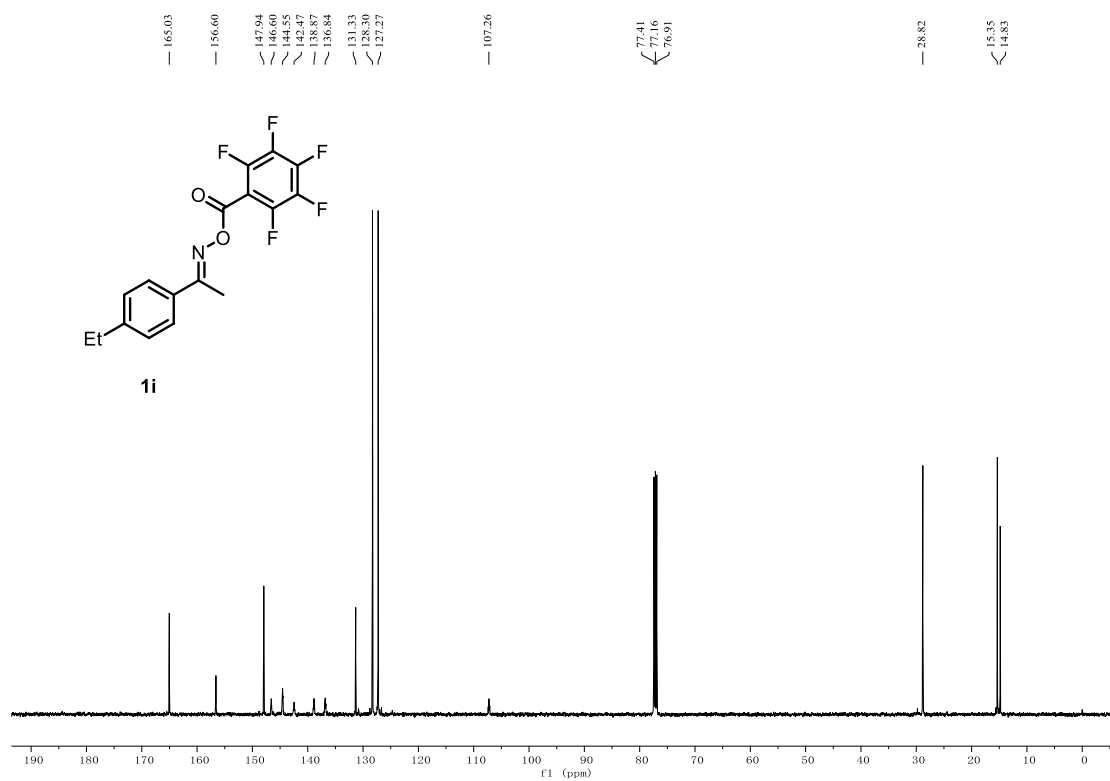

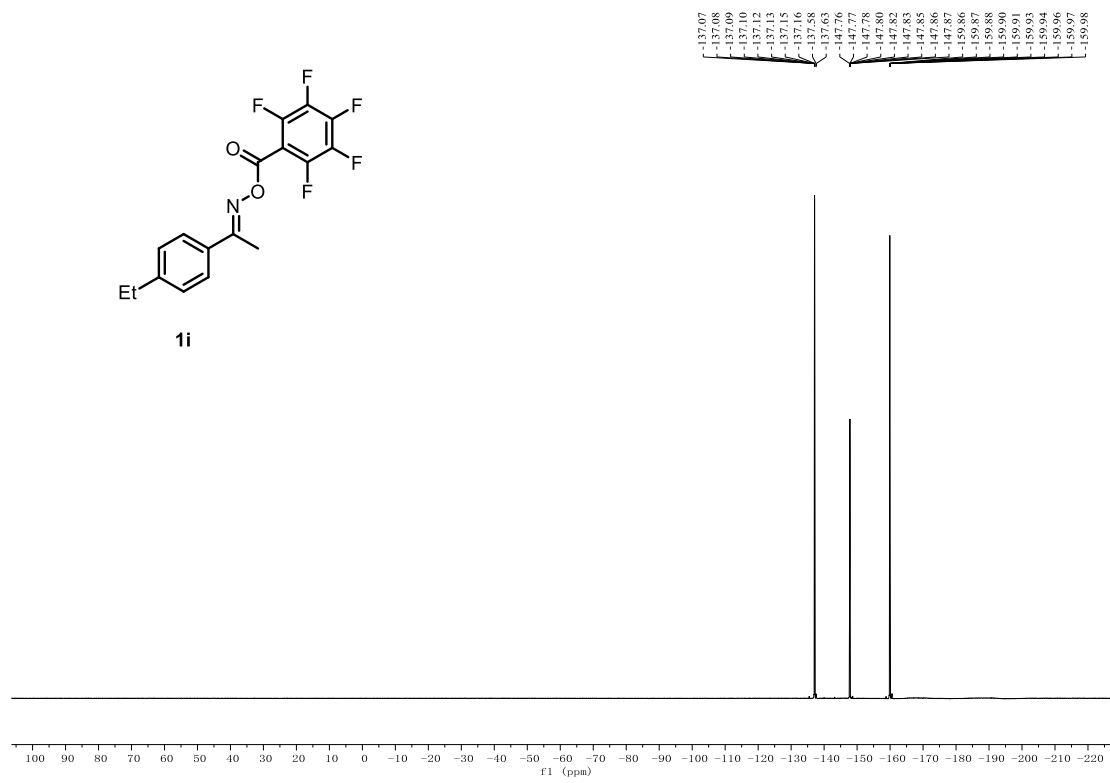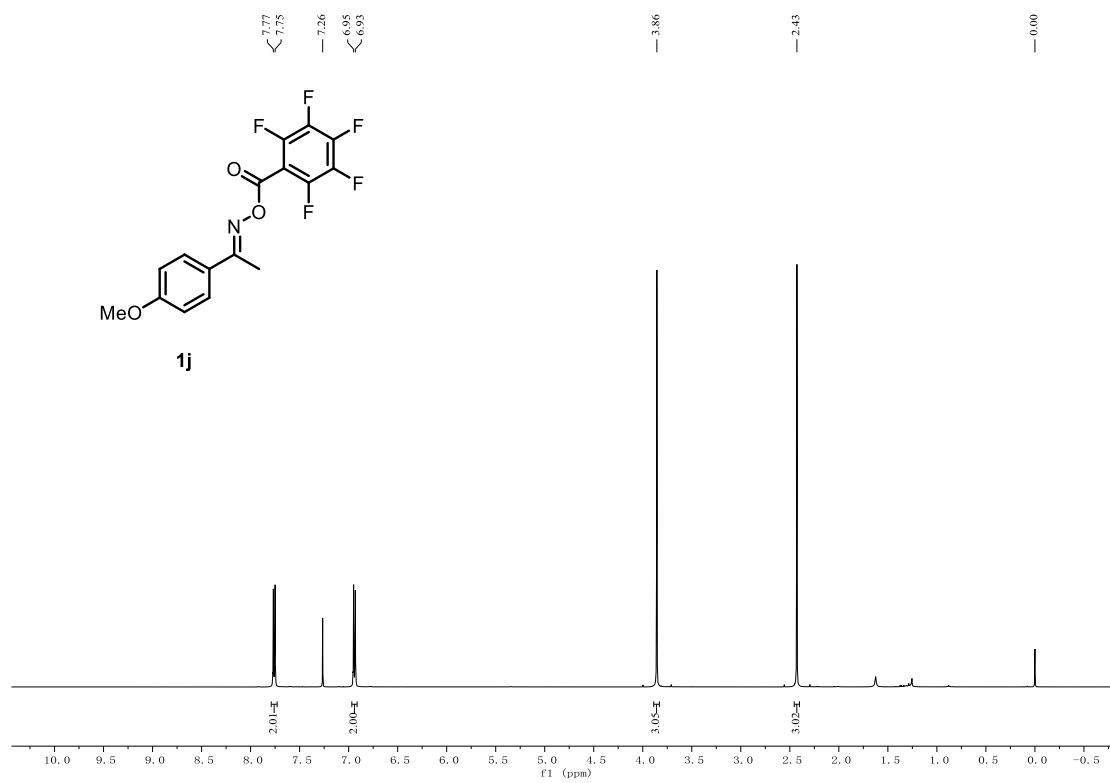

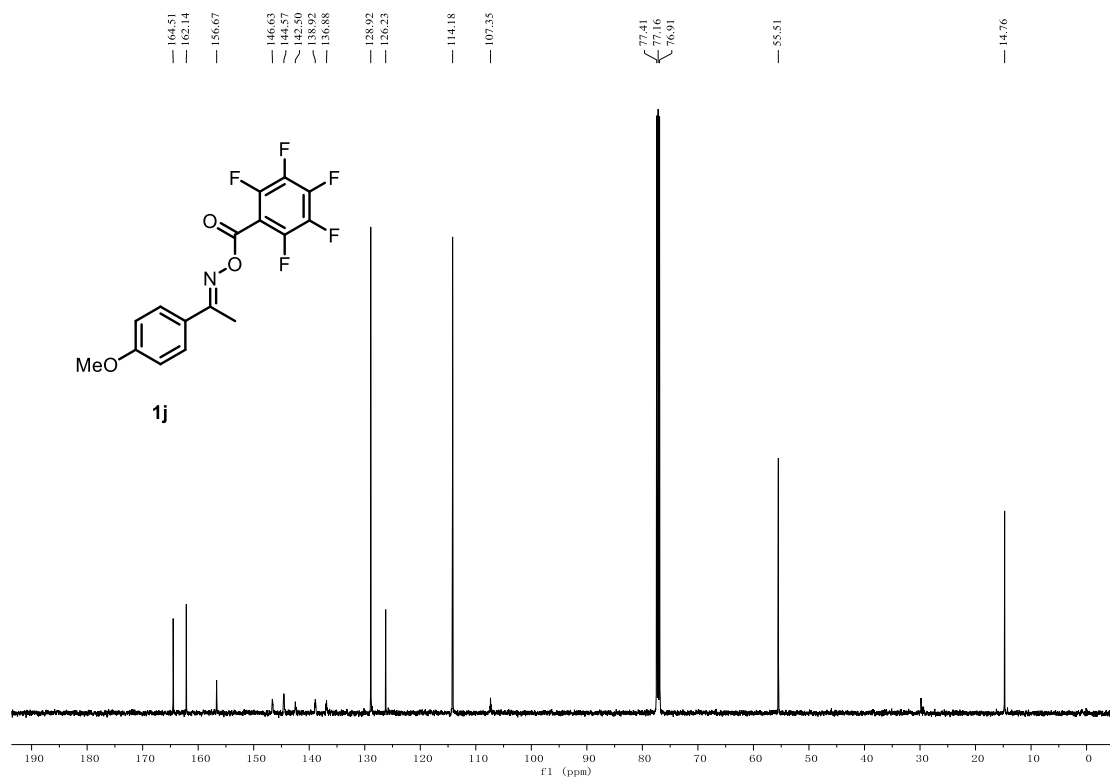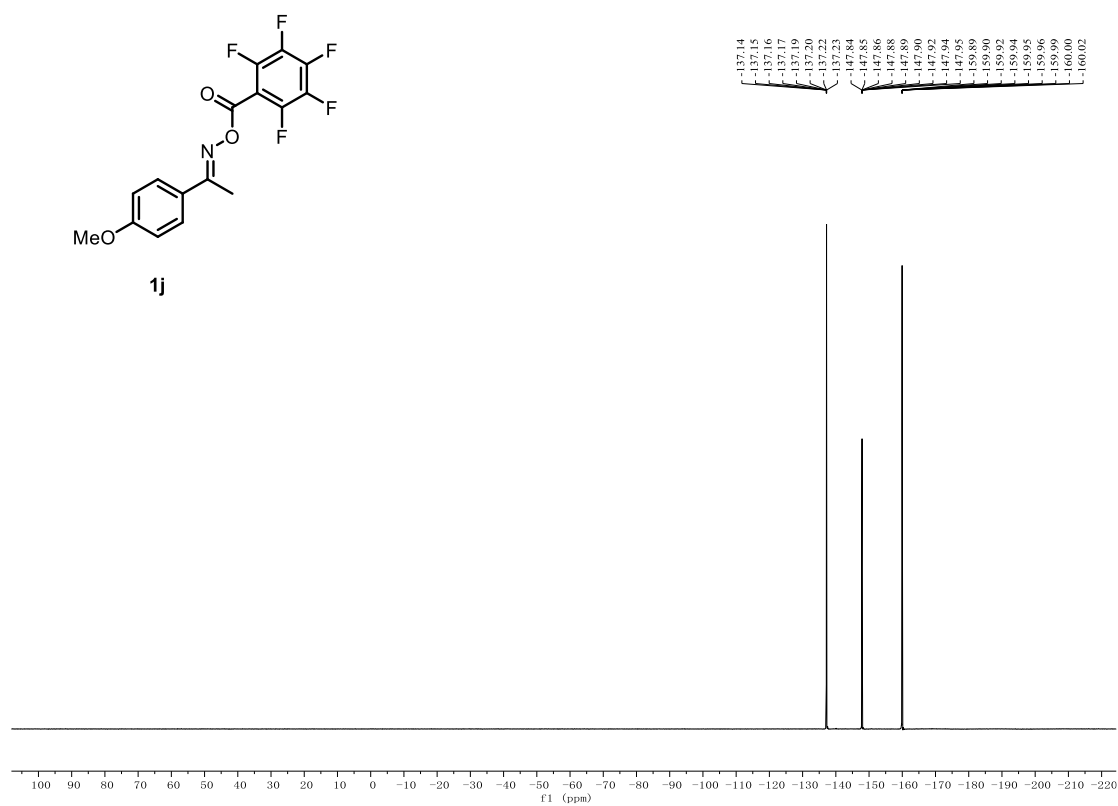

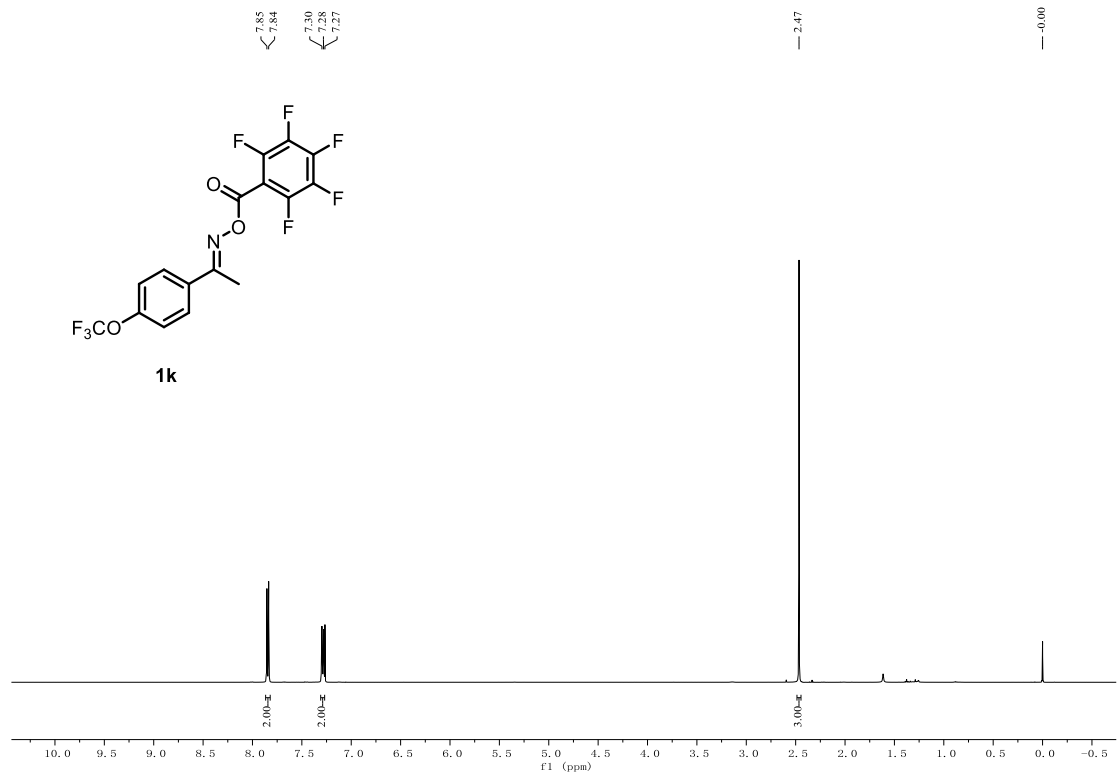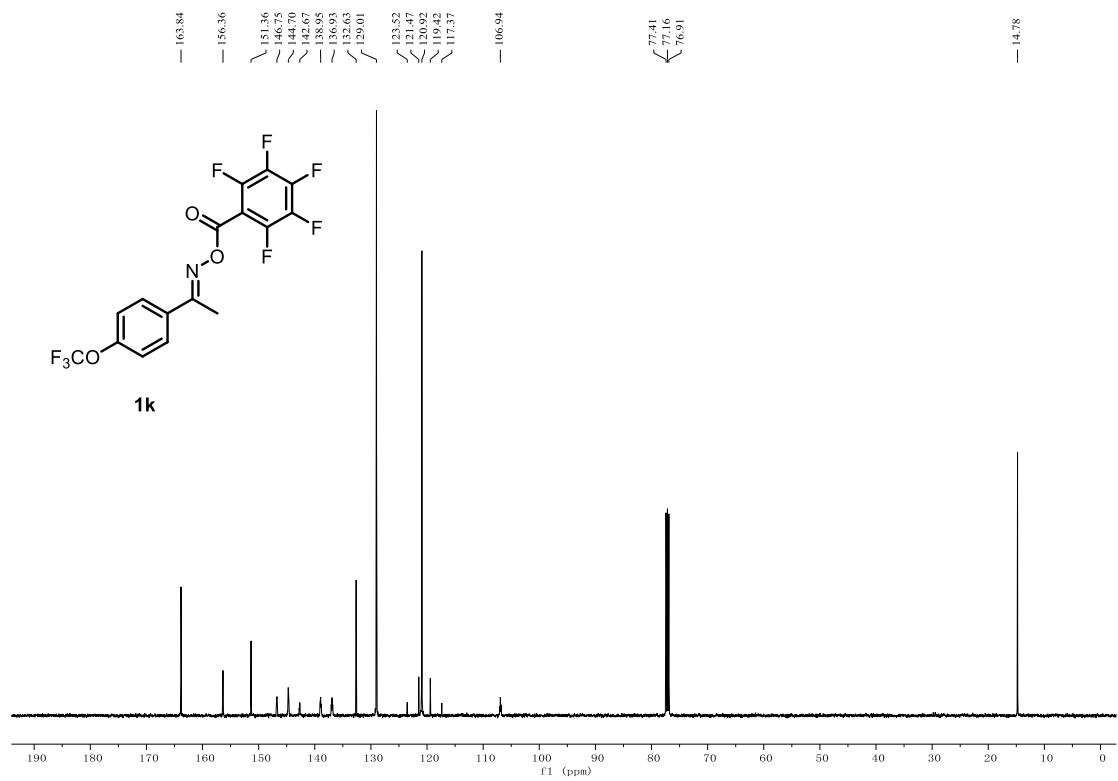

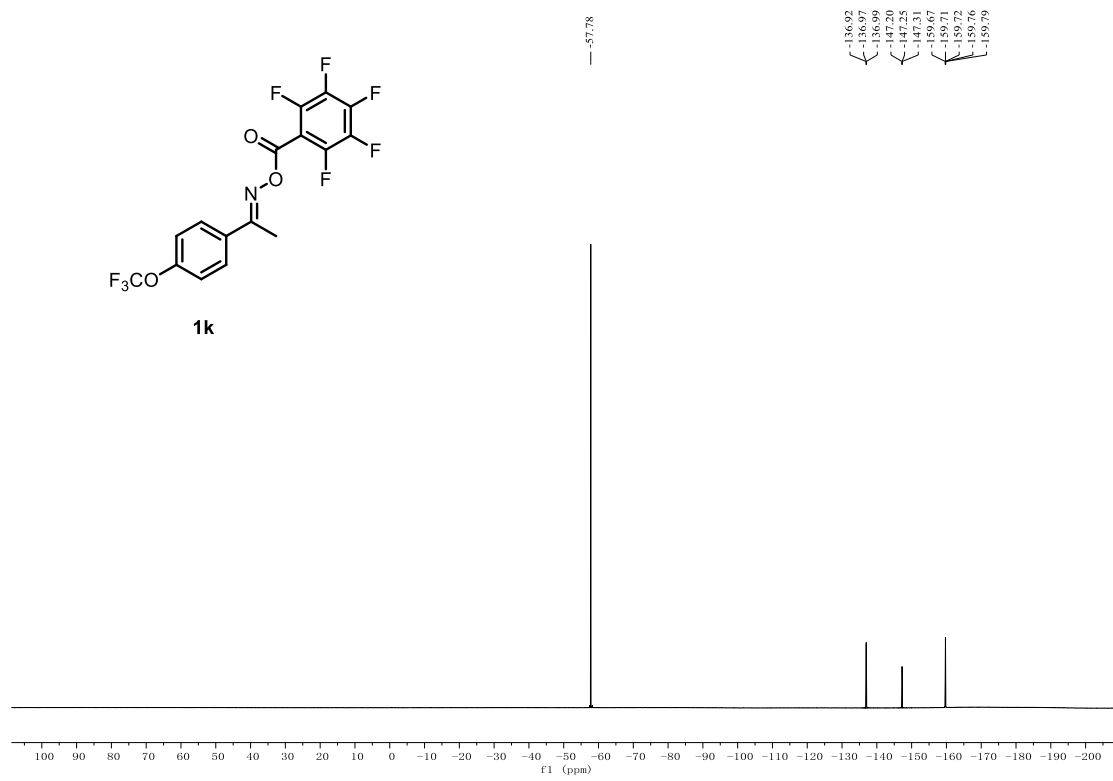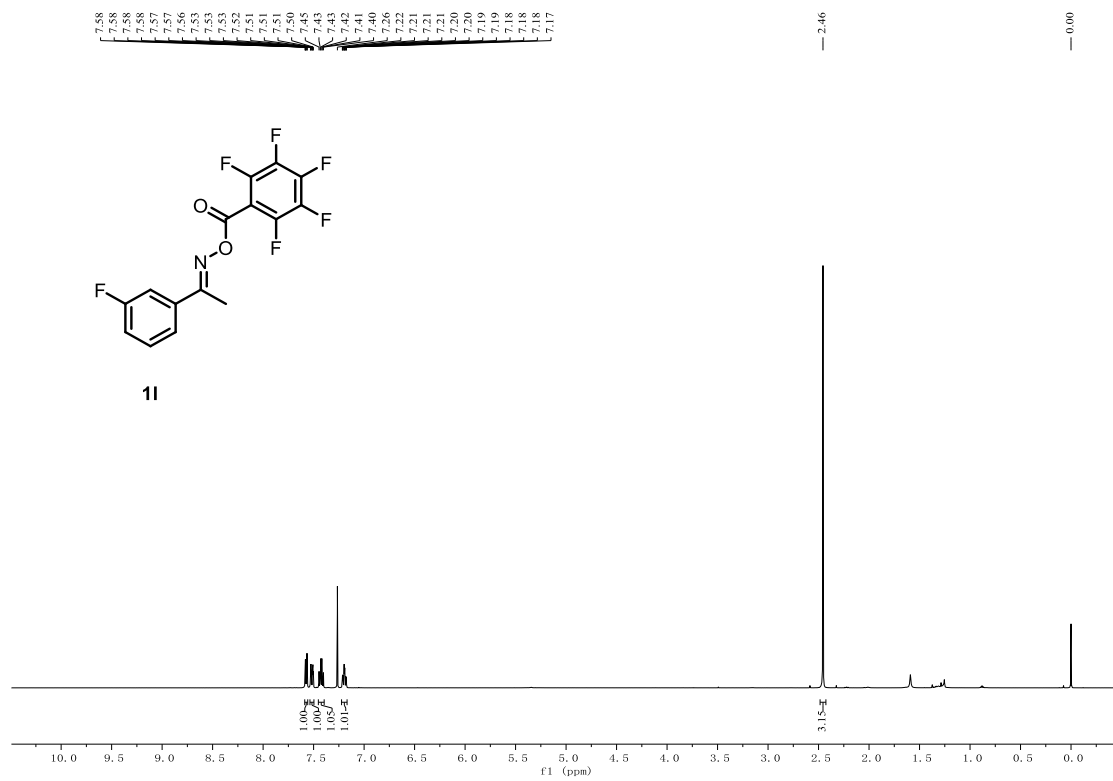



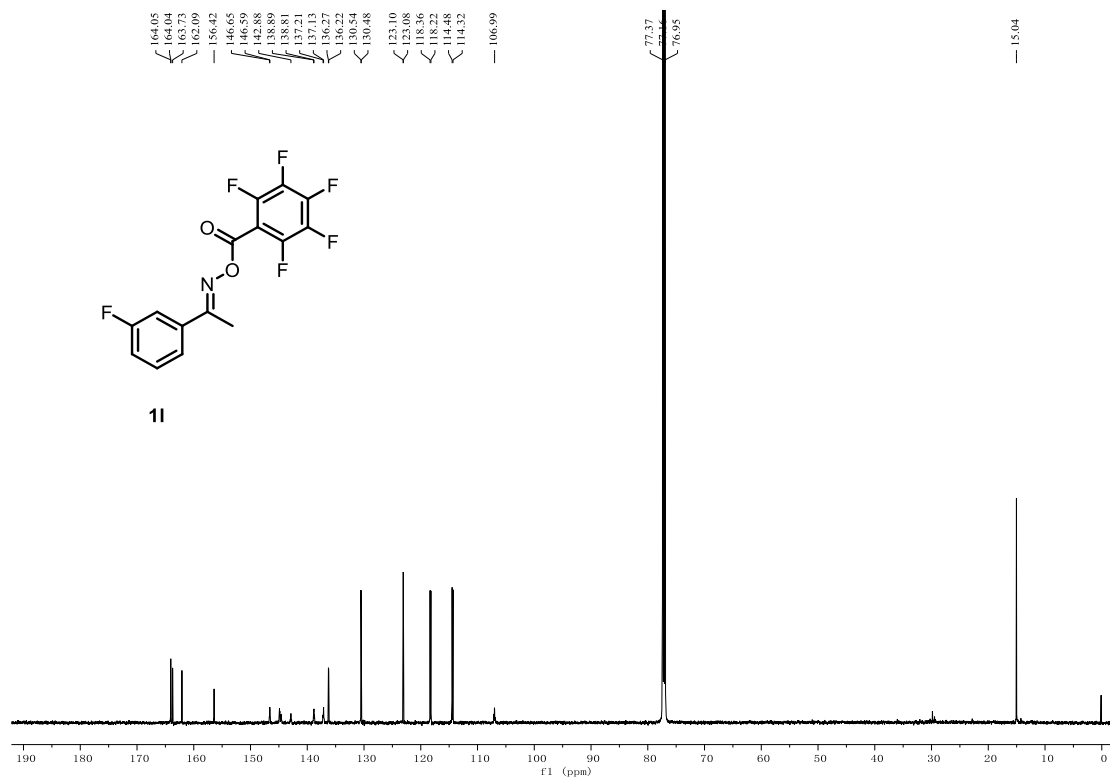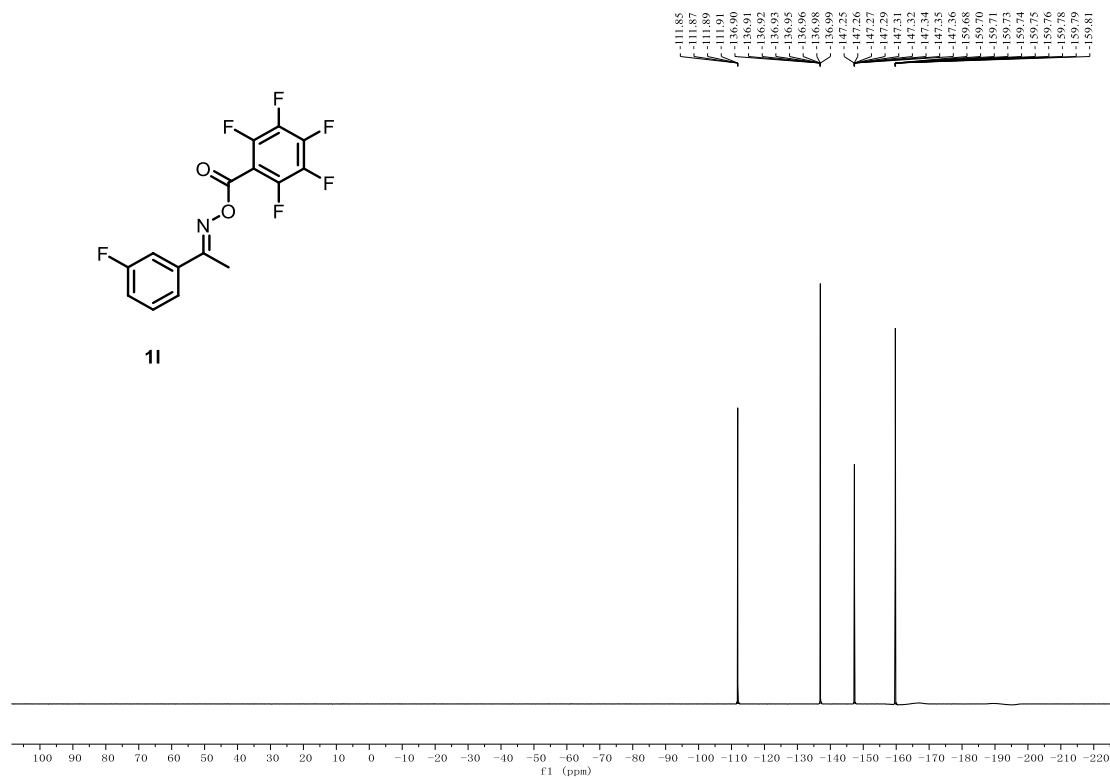

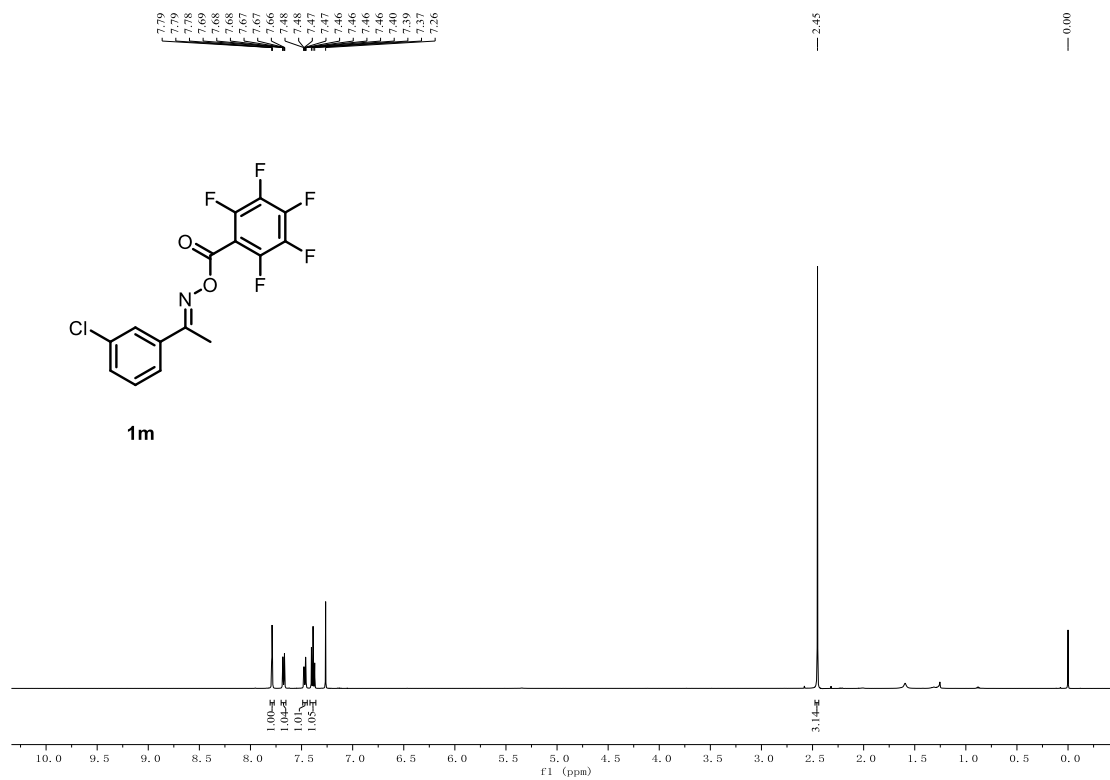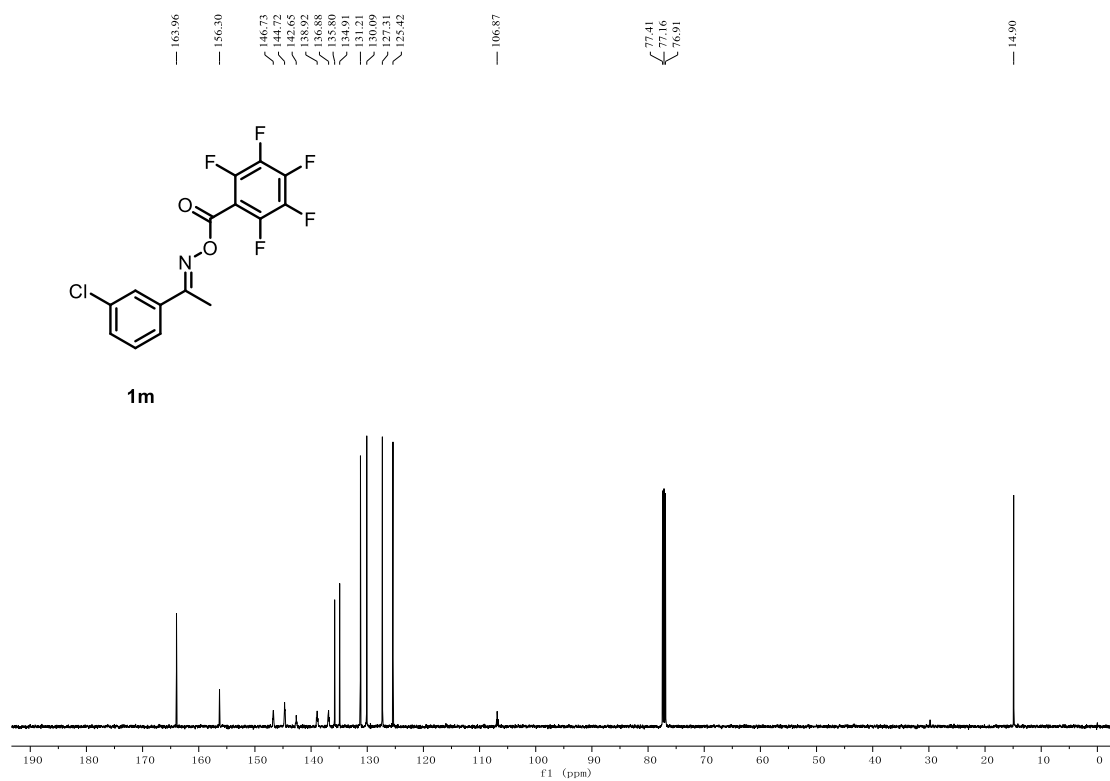

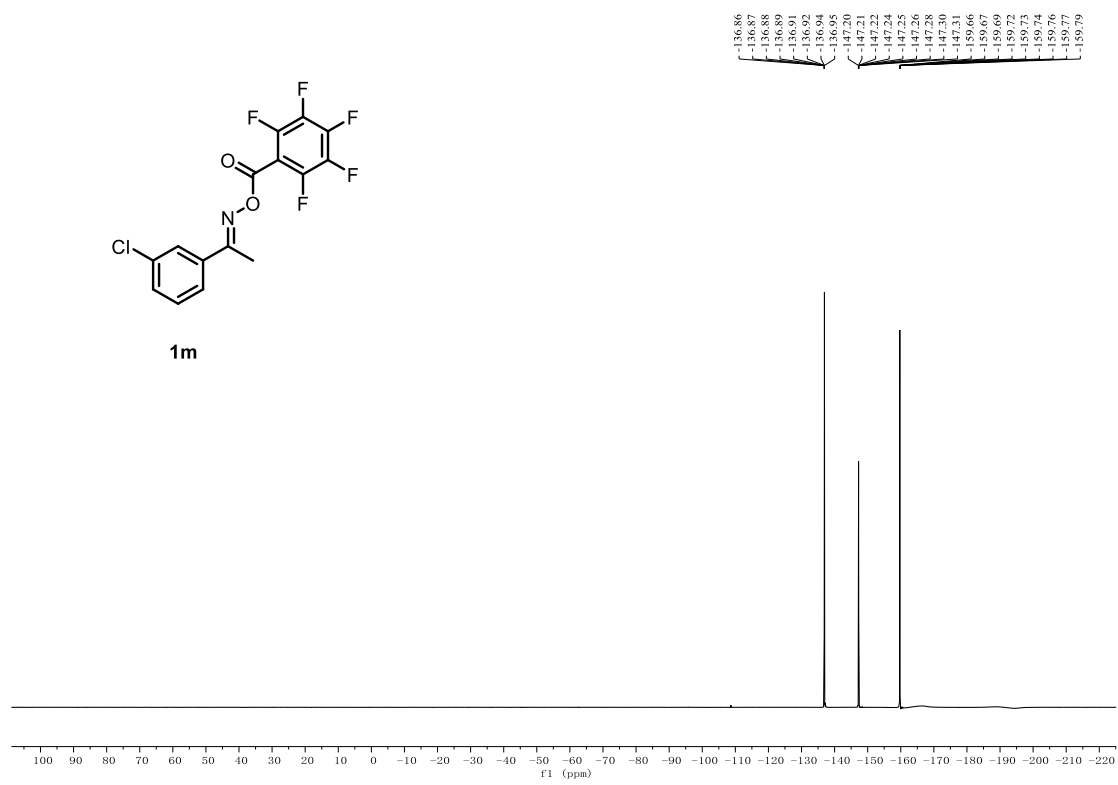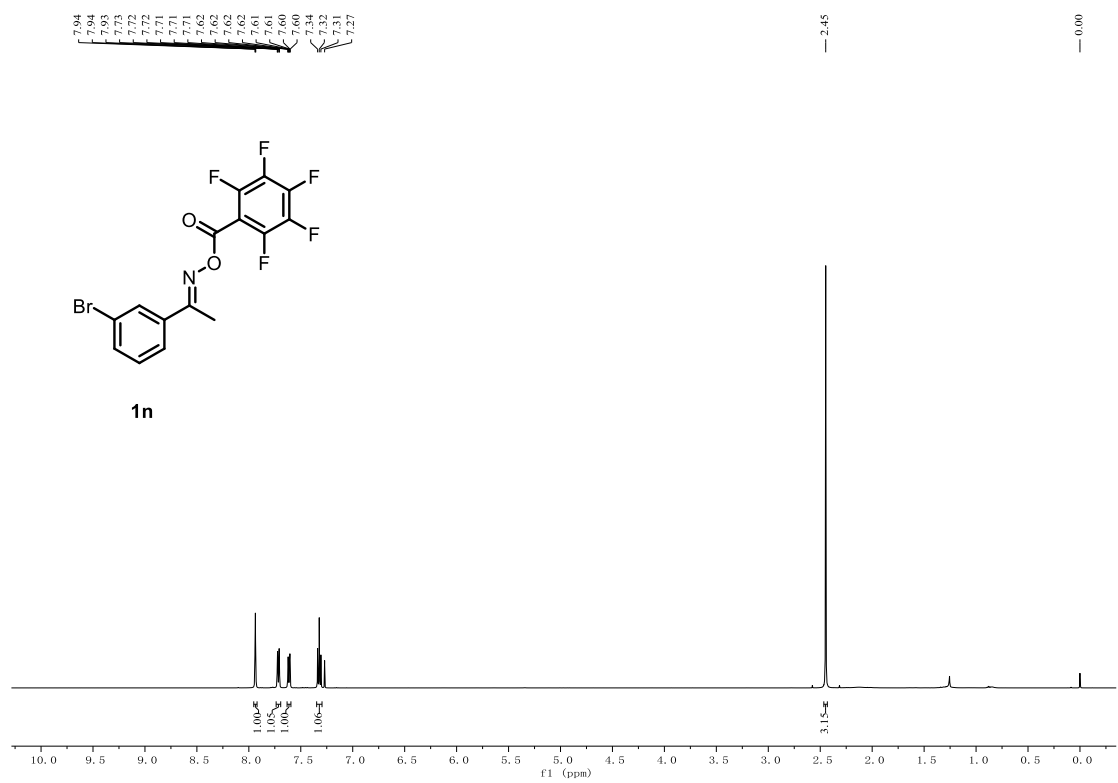

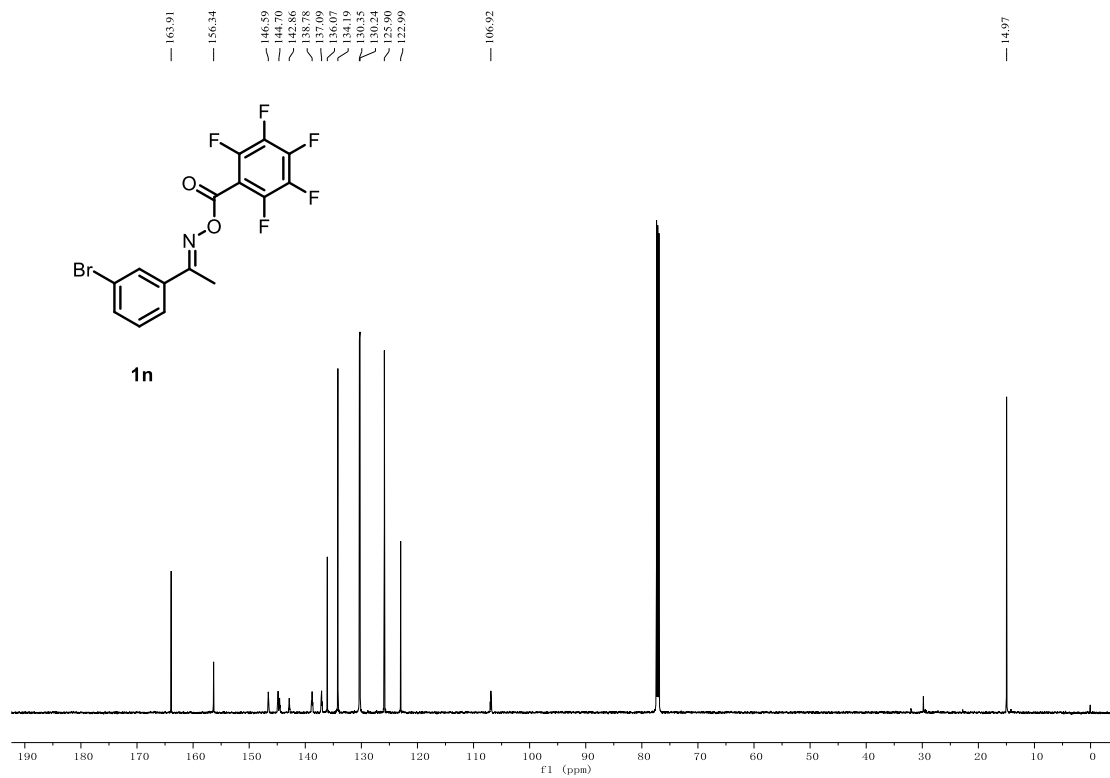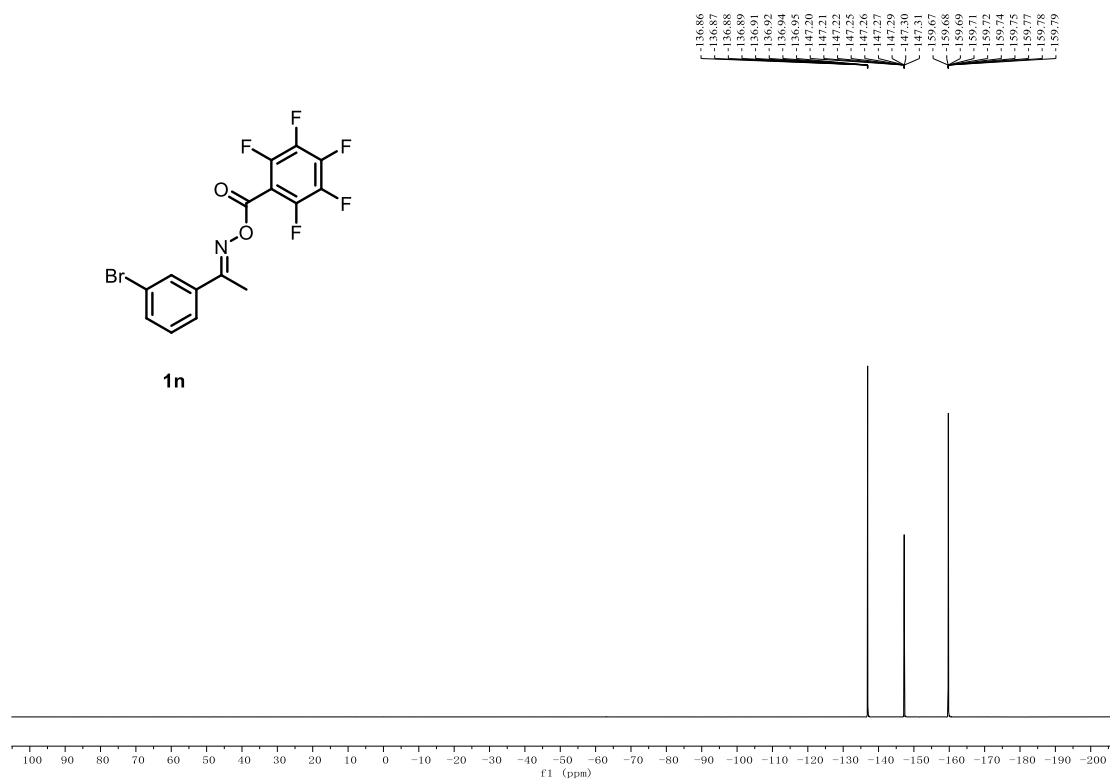

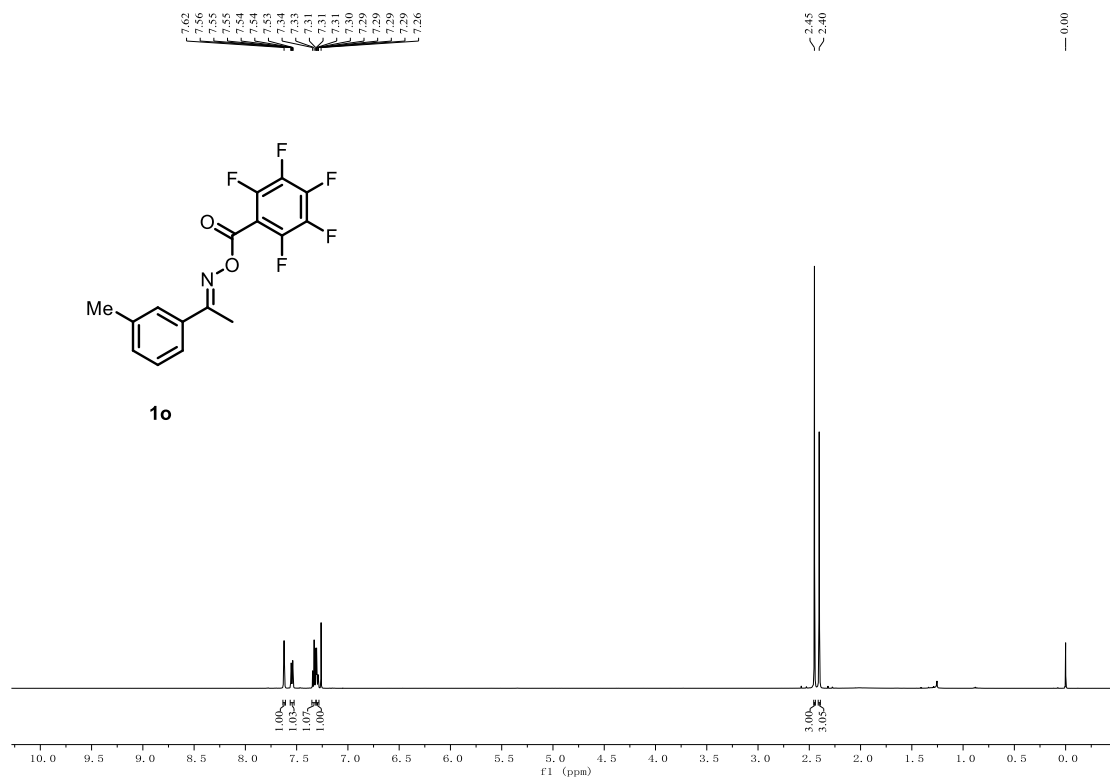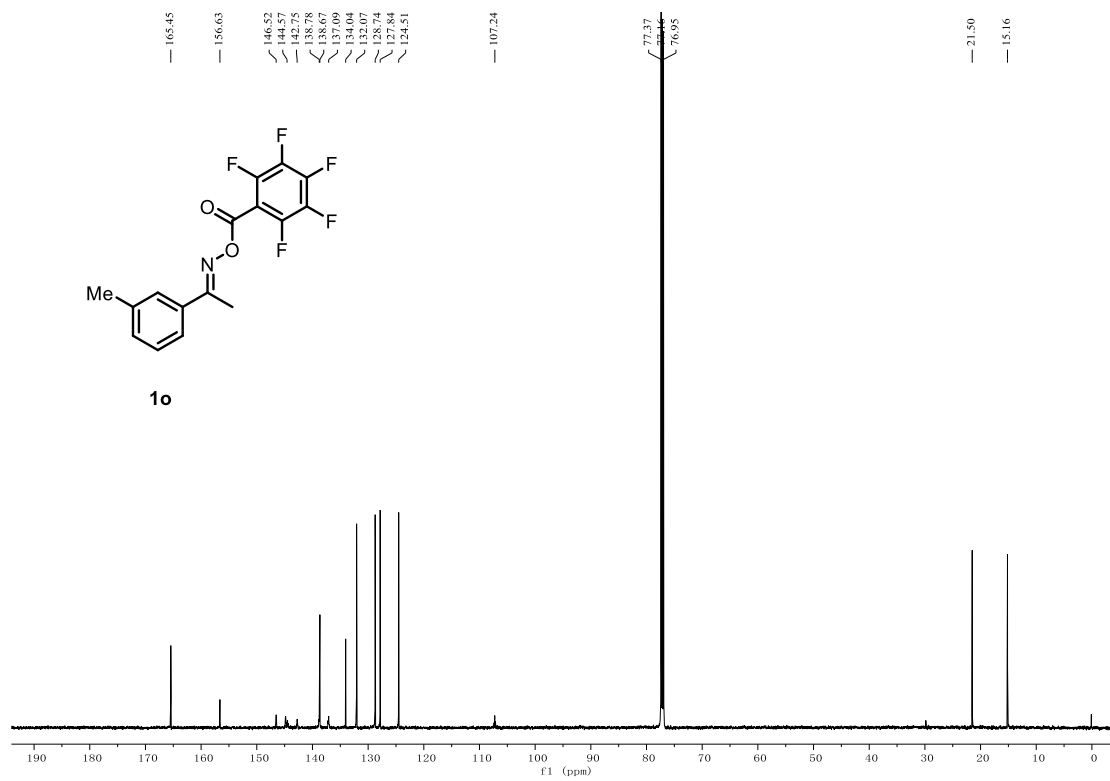

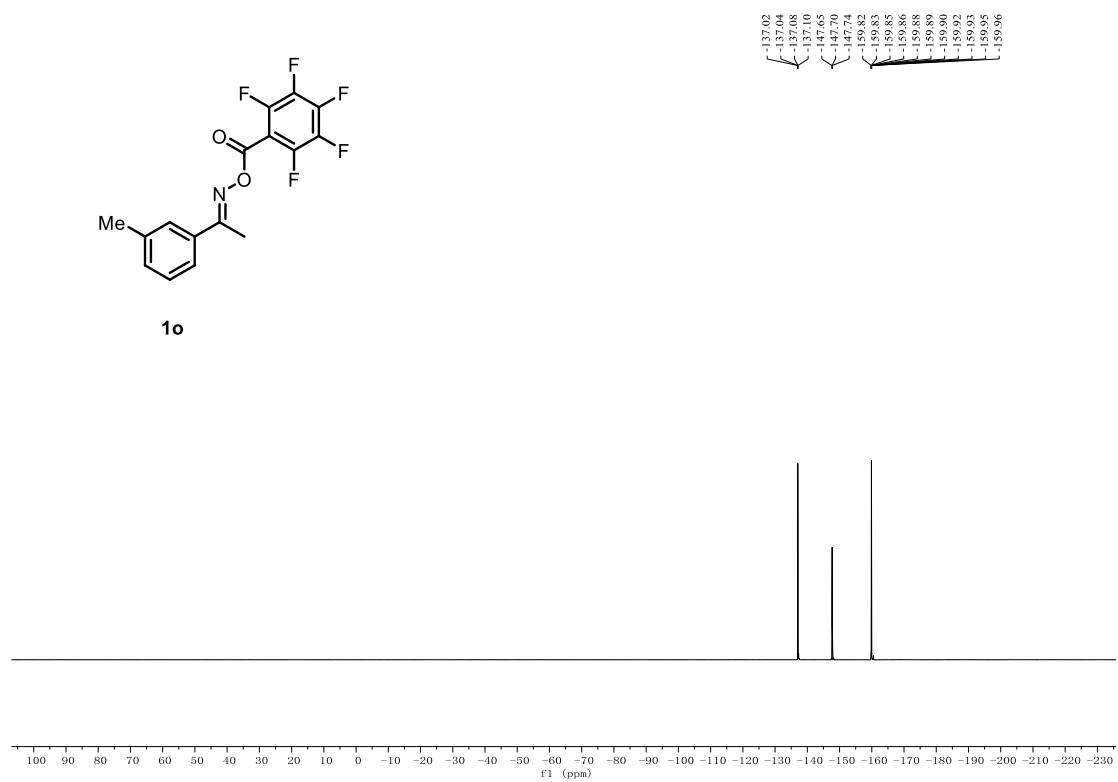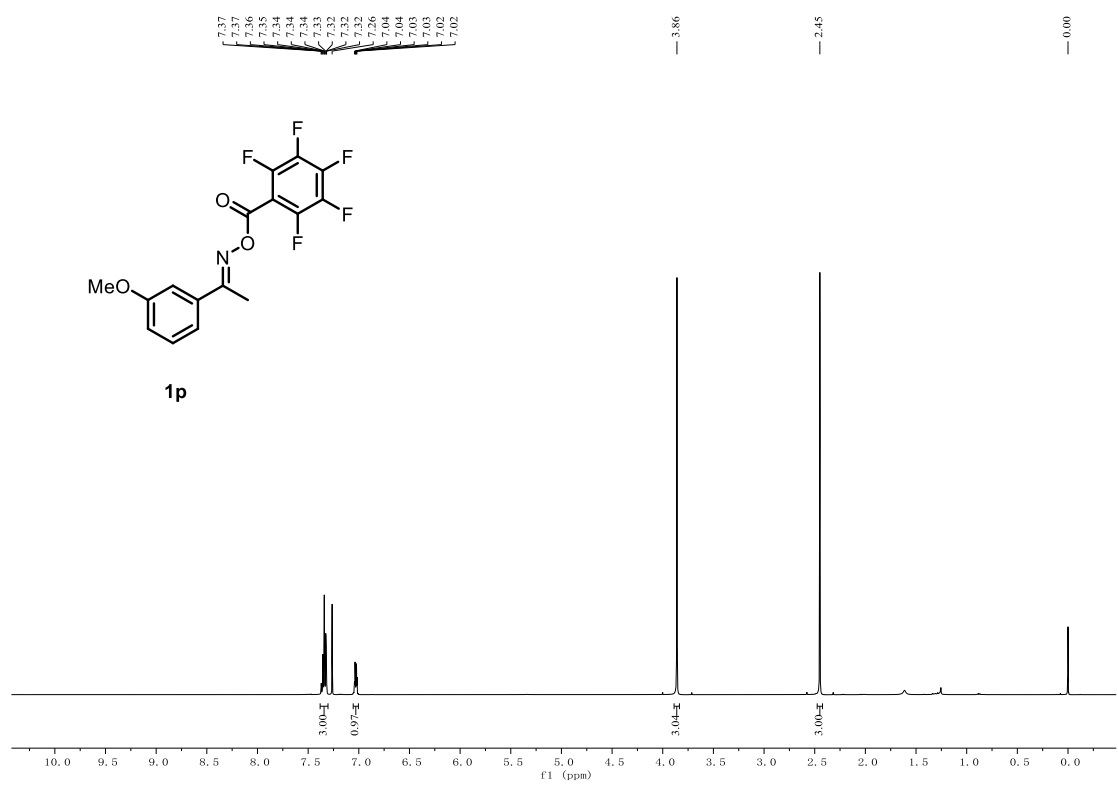

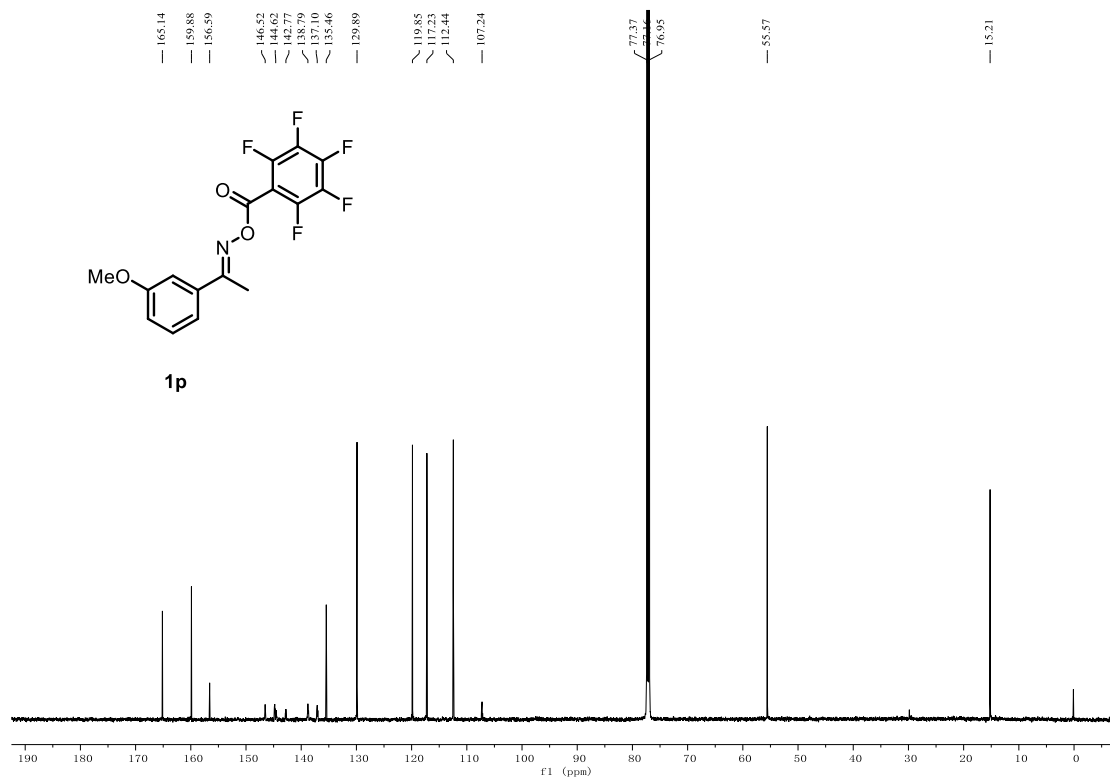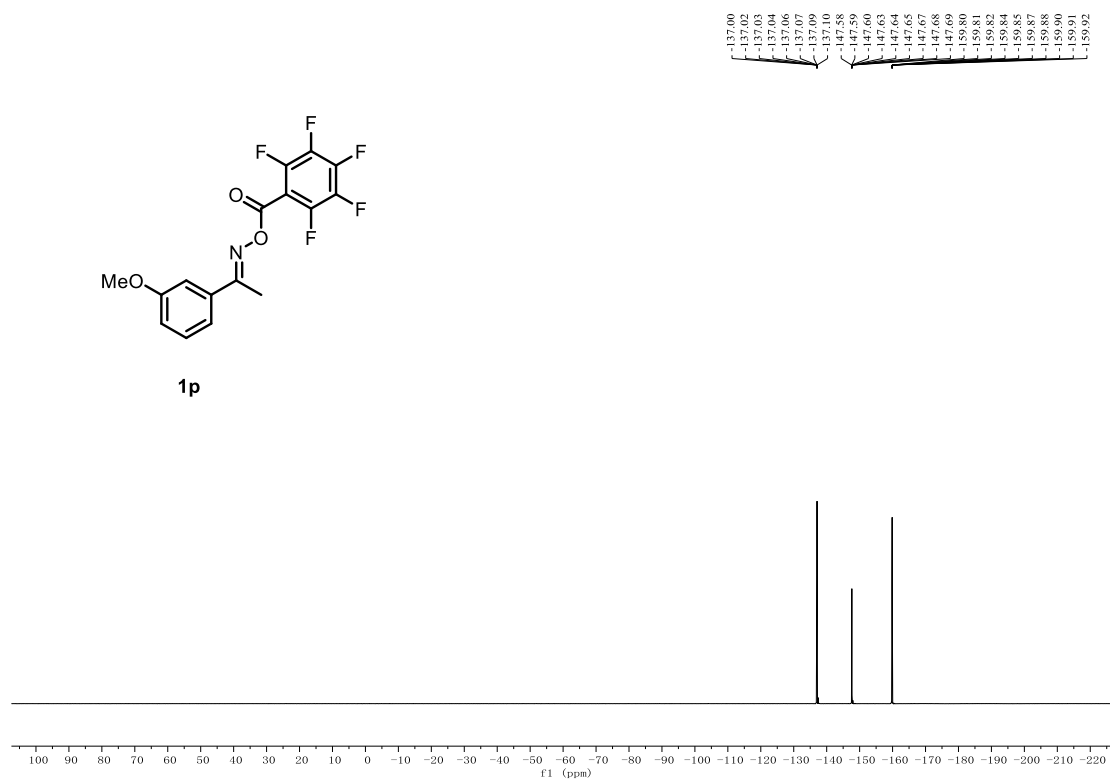

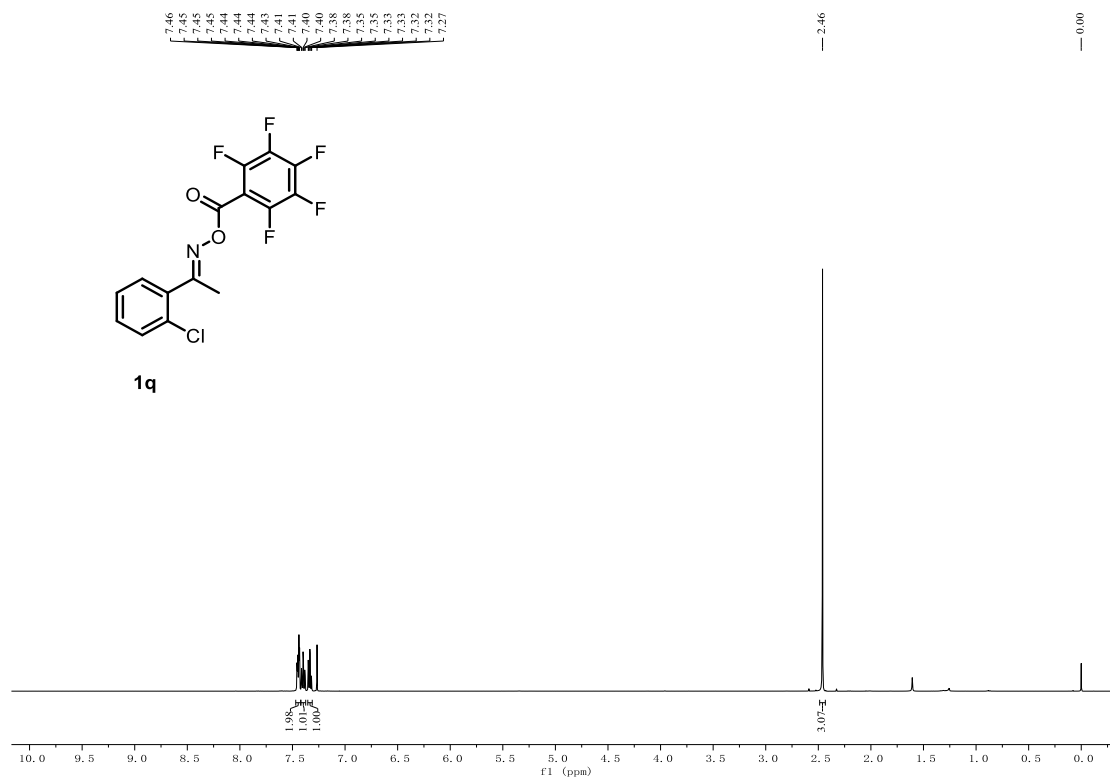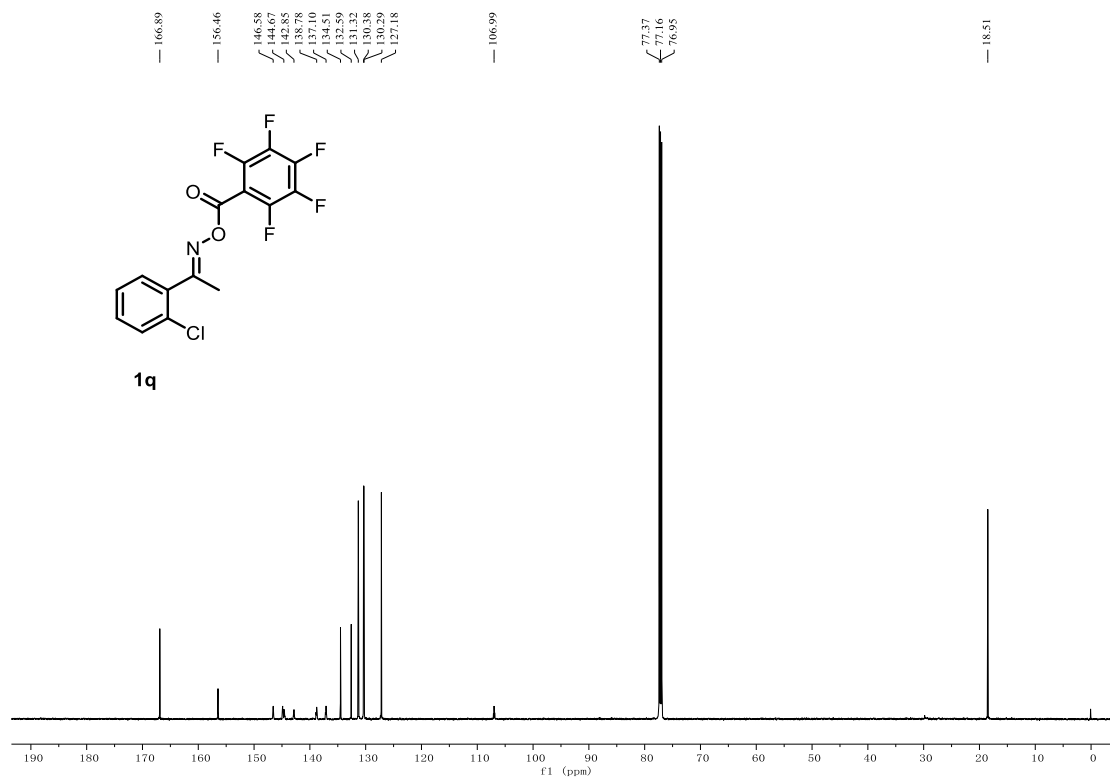



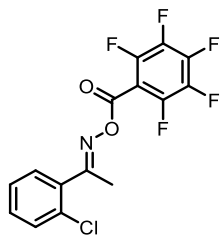

1q

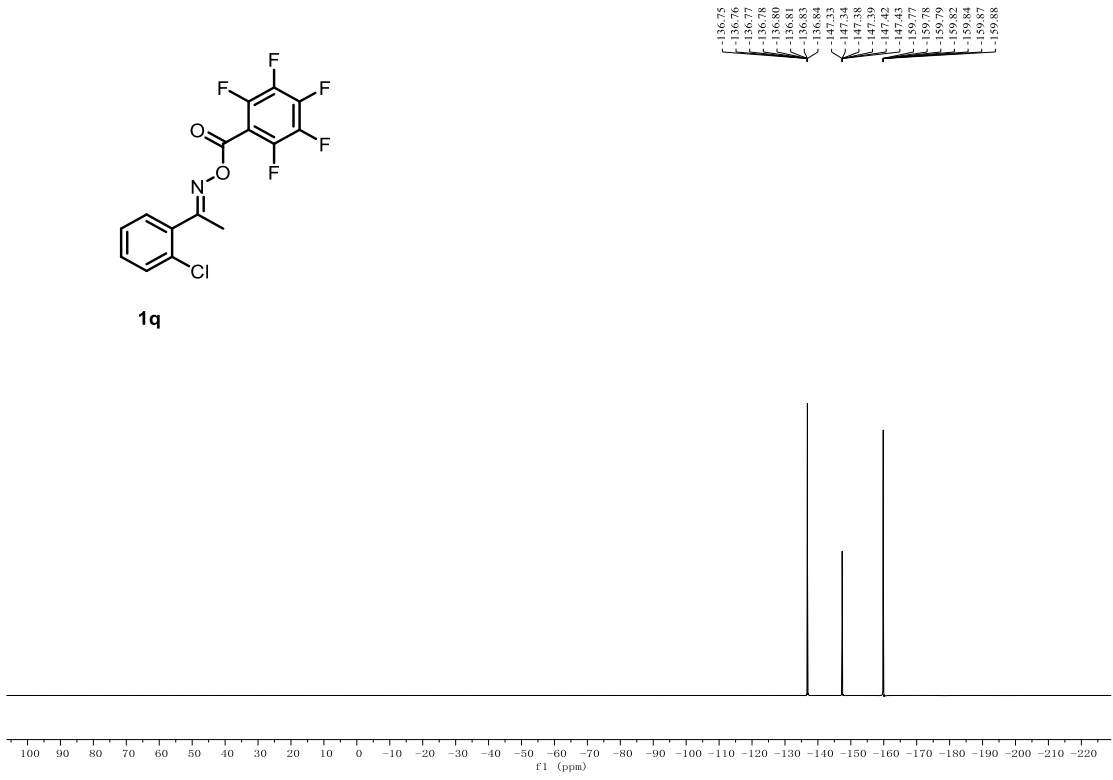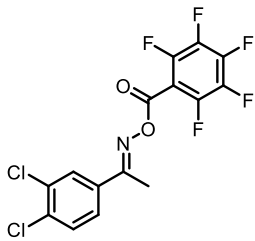

1r

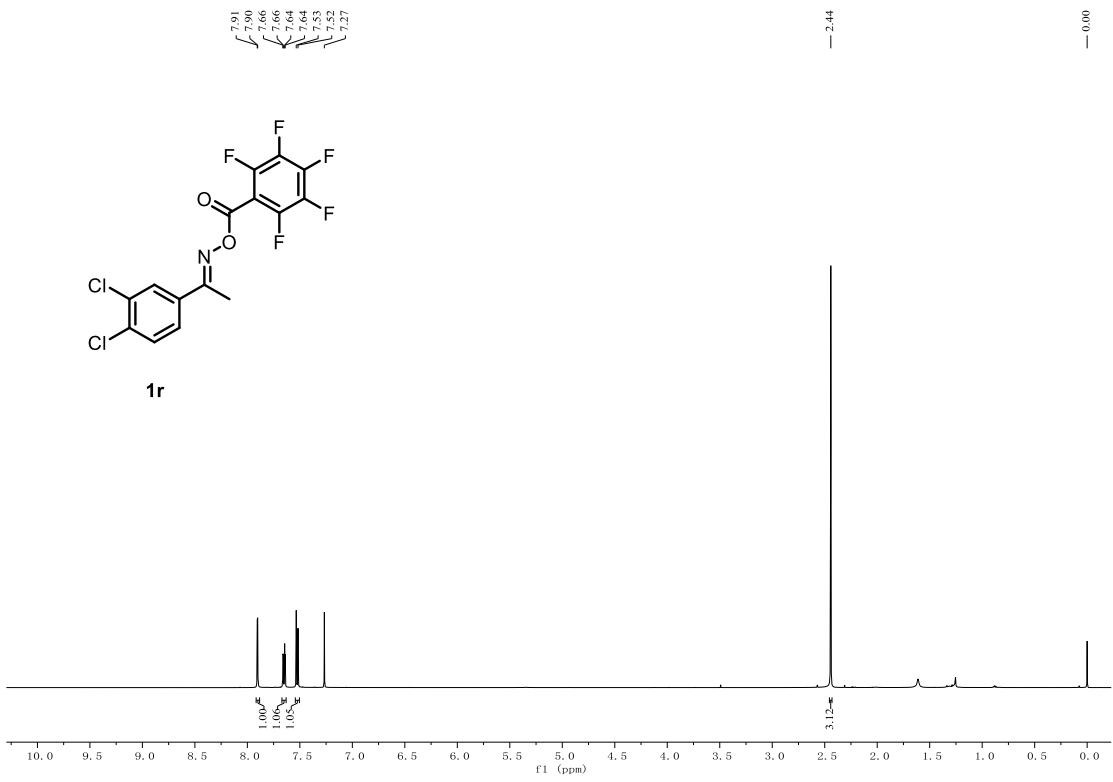

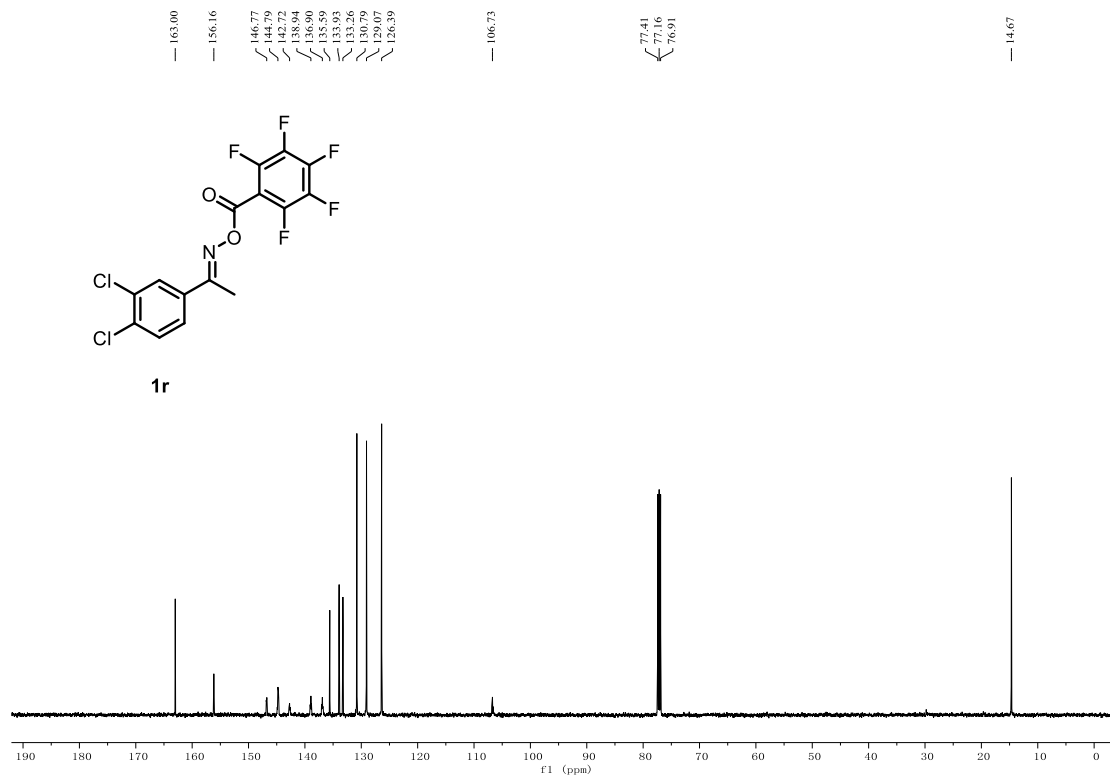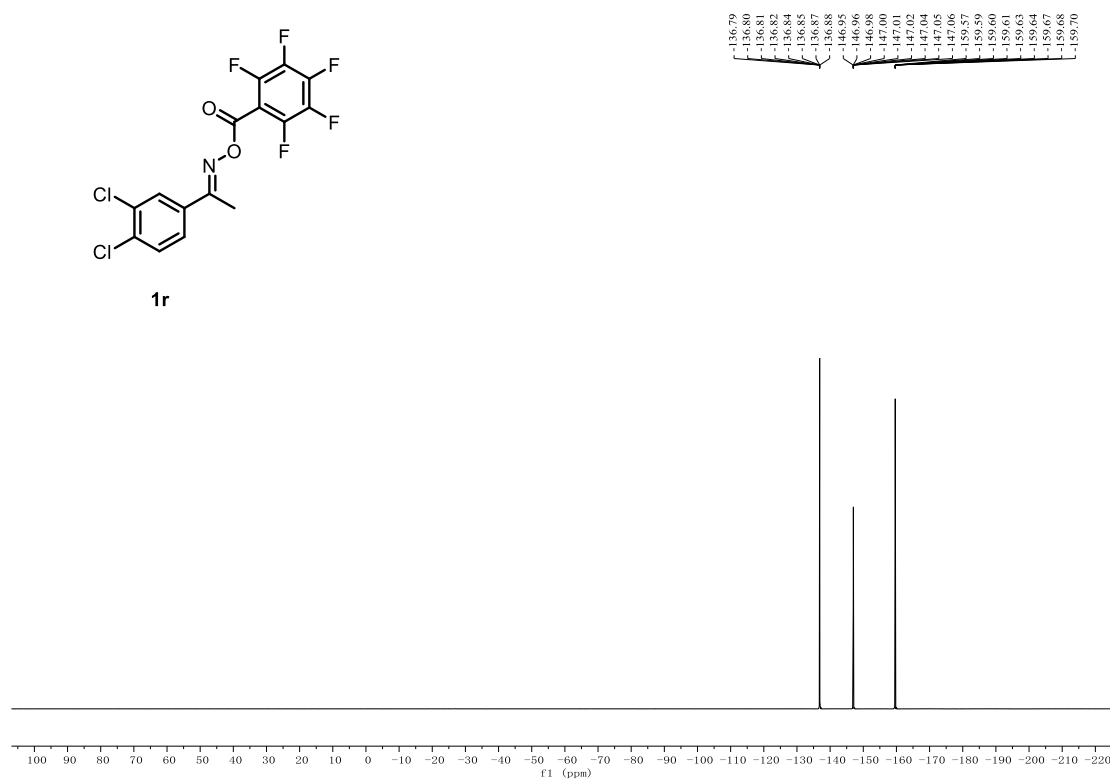

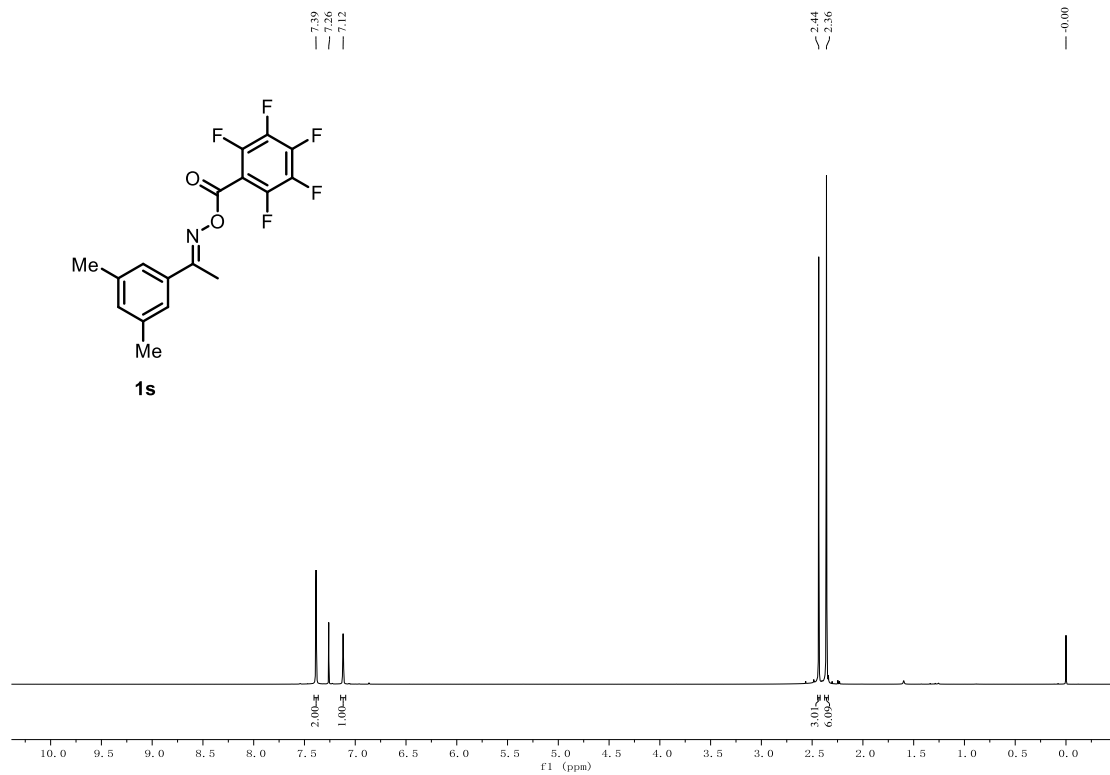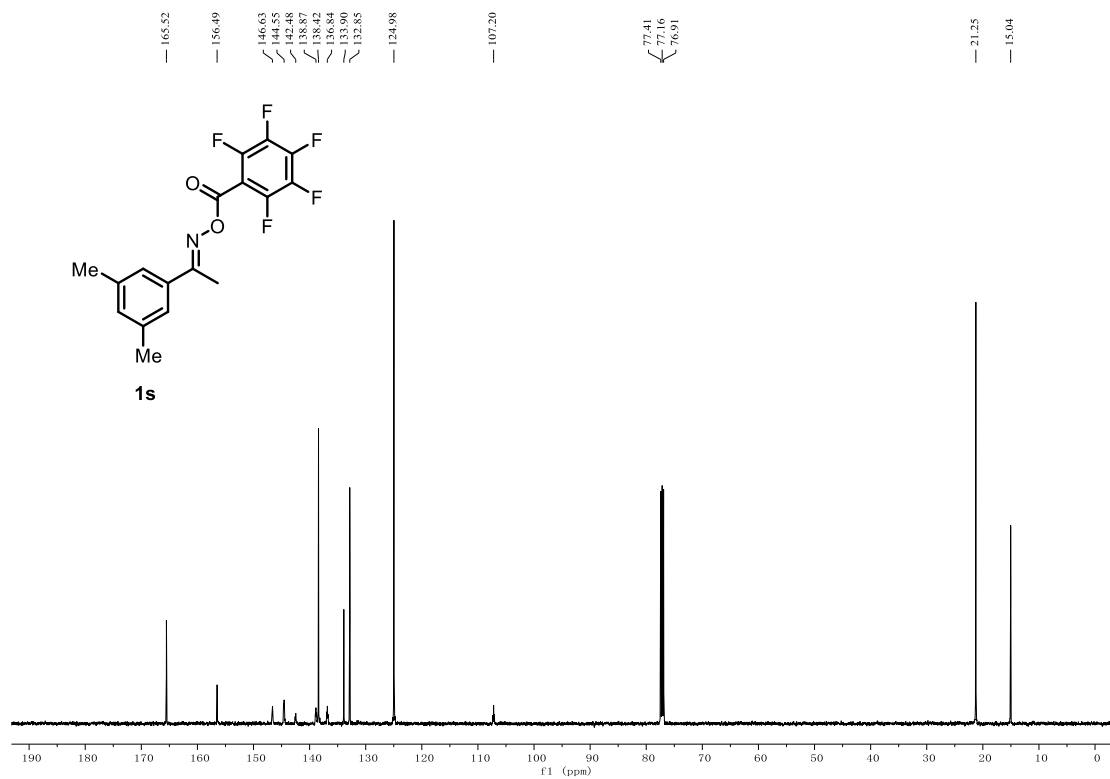

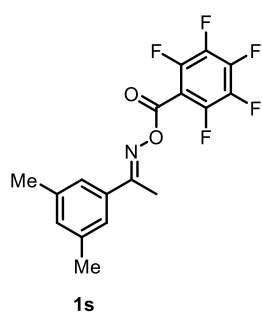

137.03  
 137.04  
 137.06  
 137.08  
 137.09  
 137.11  
 144.72  
 144.77  
 144.81  
 149.86  
 159.87  
 159.88  
 159.91  
 159.93  
 159.96  
 159.97  
 159.98

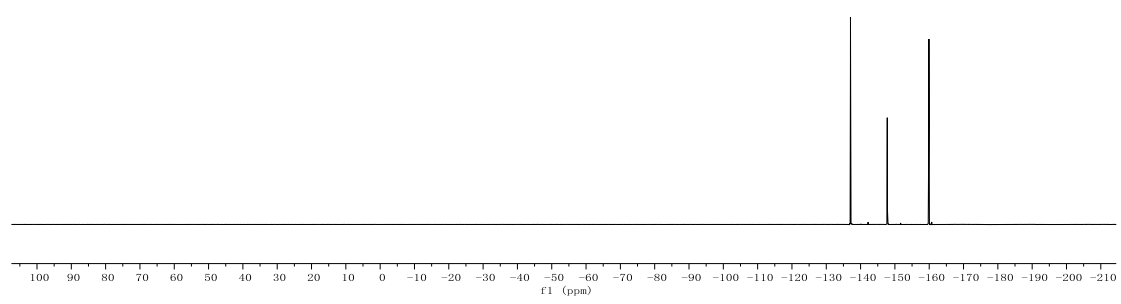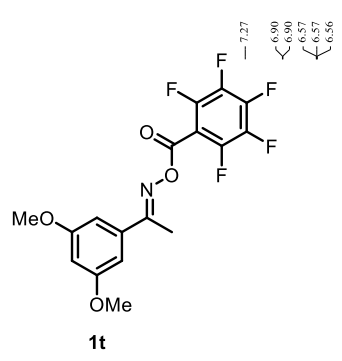

7.27  
 6.90  
 6.90  
 6.57  
 6.57  
 6.56  
 3.84  
 2.43  
 0.00

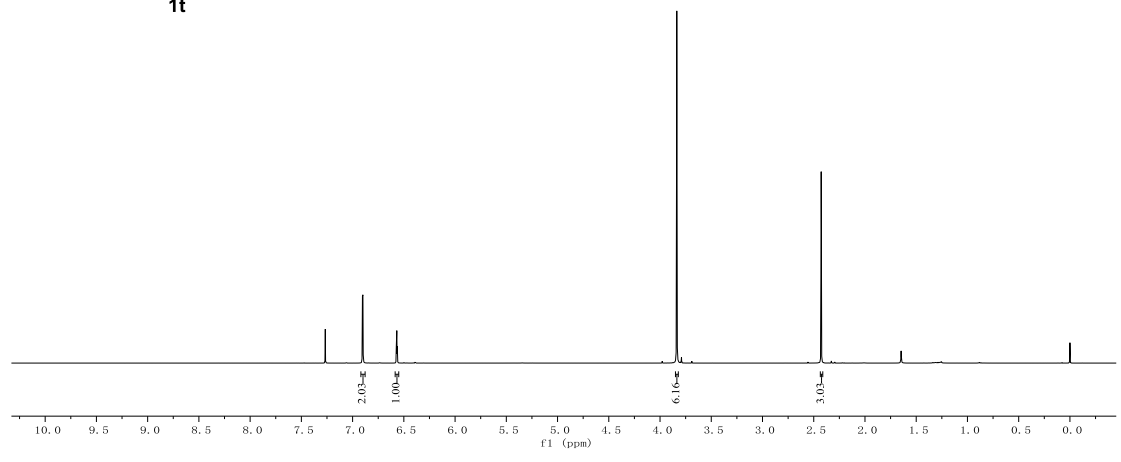

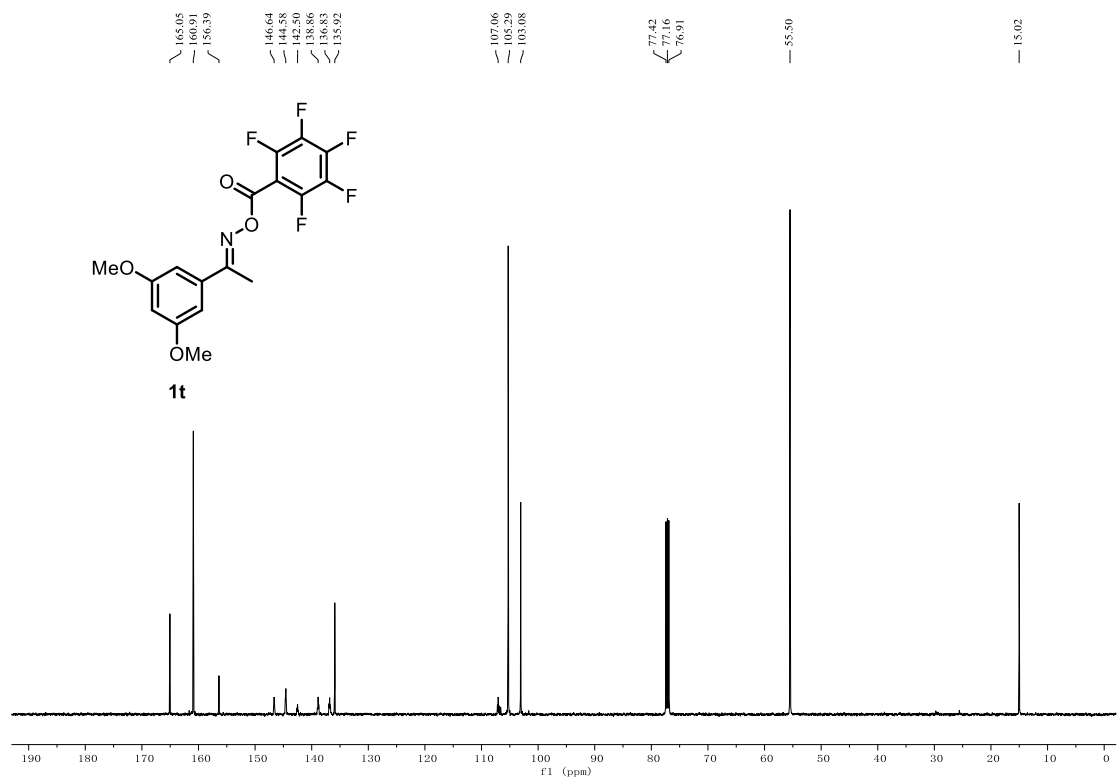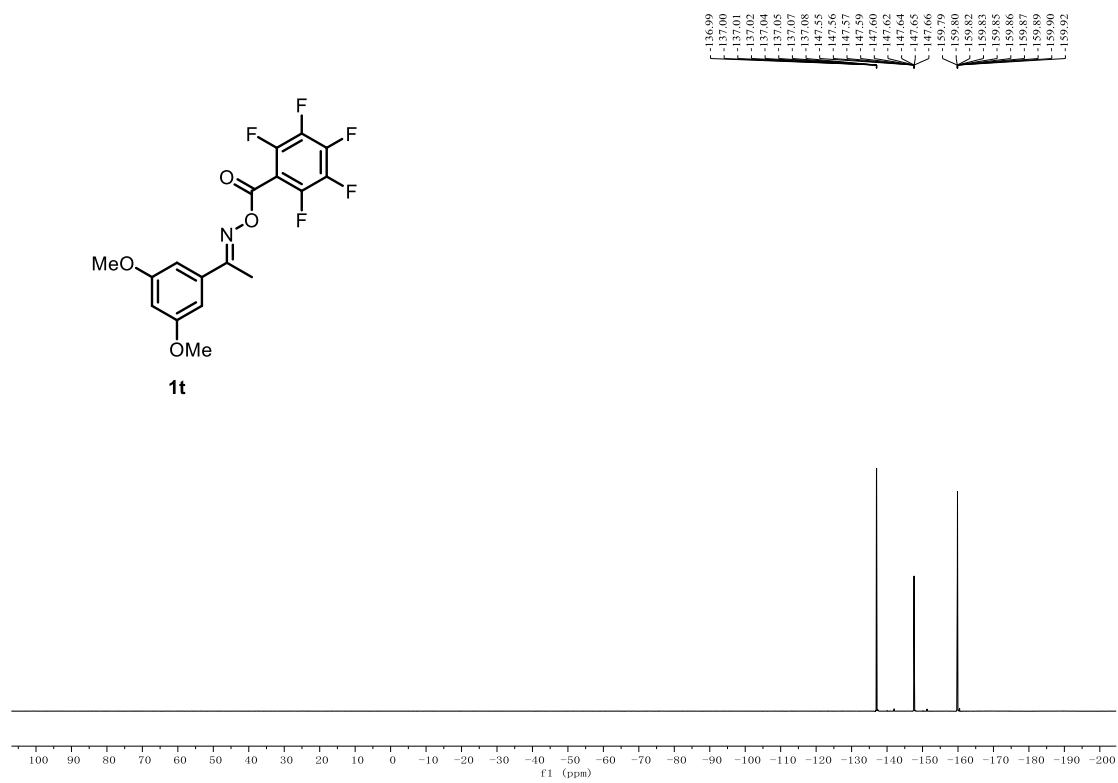

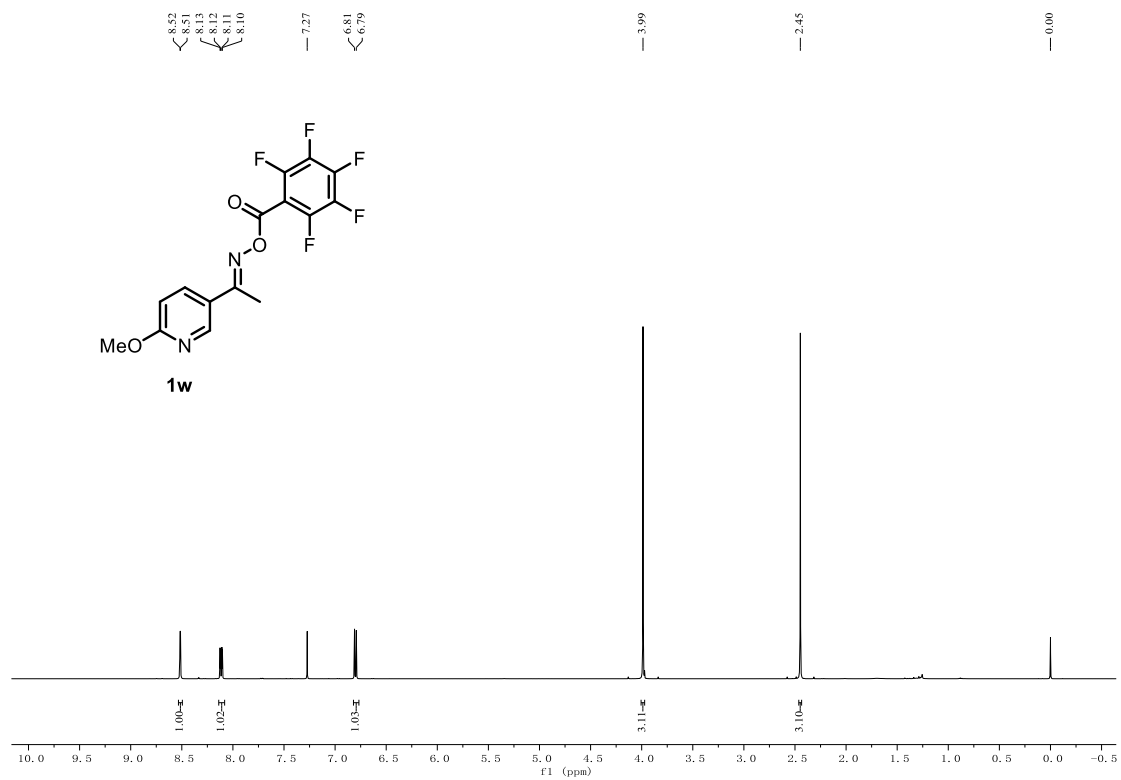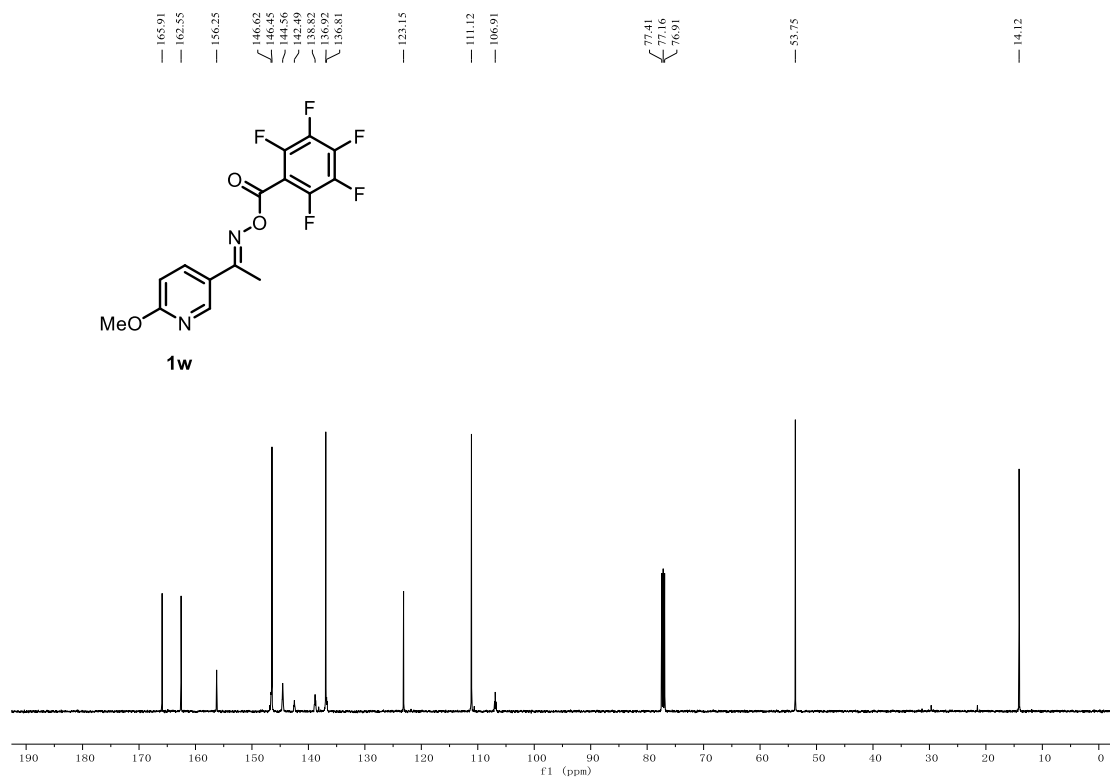

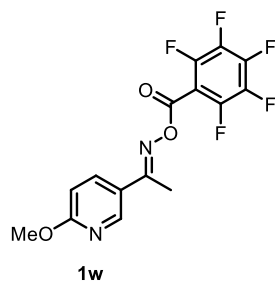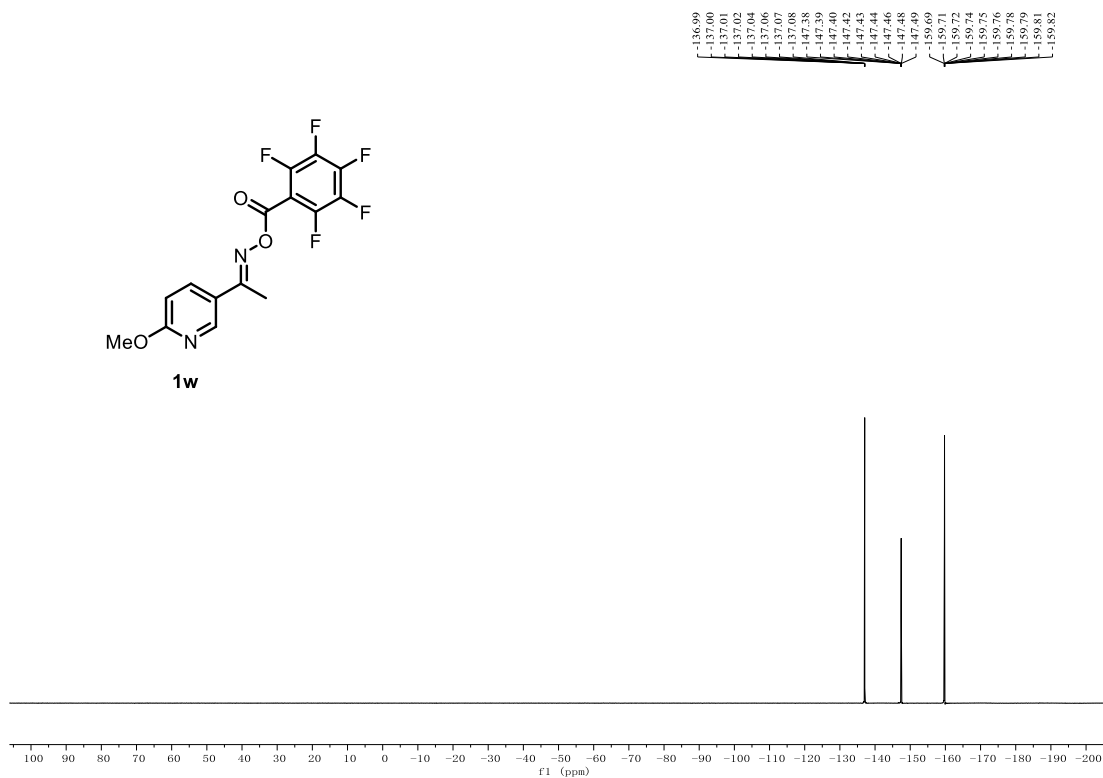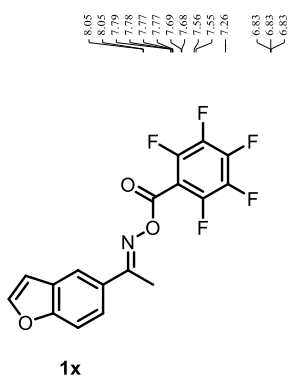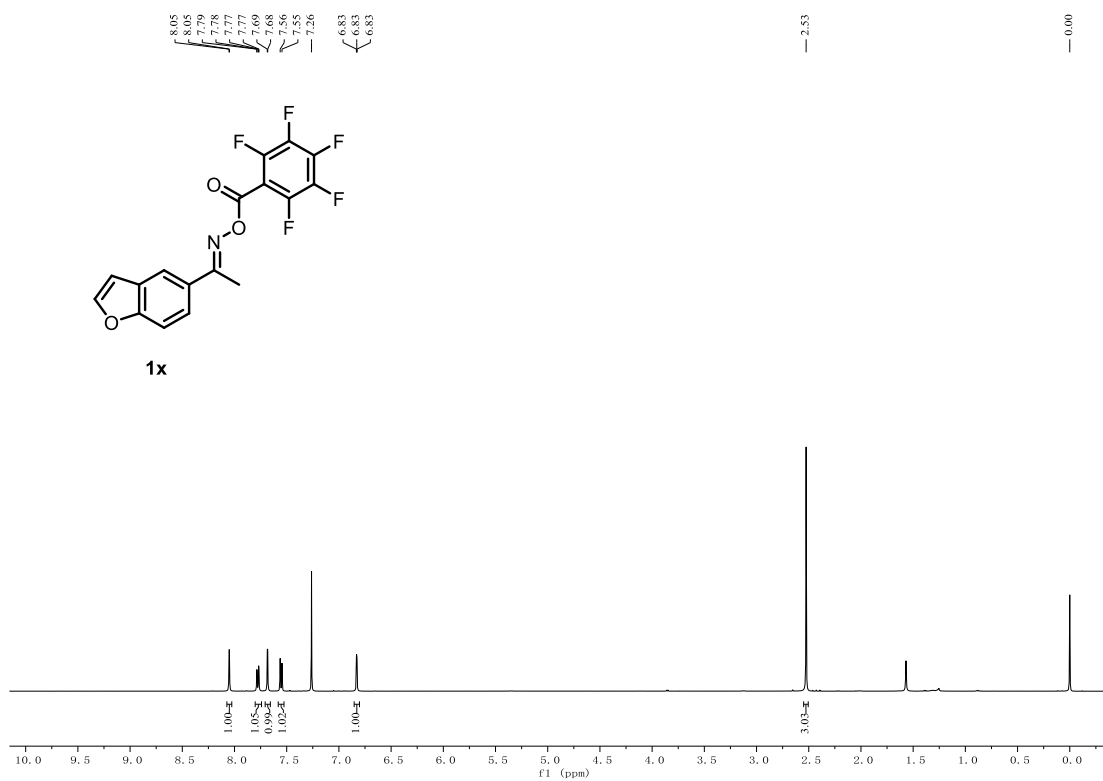

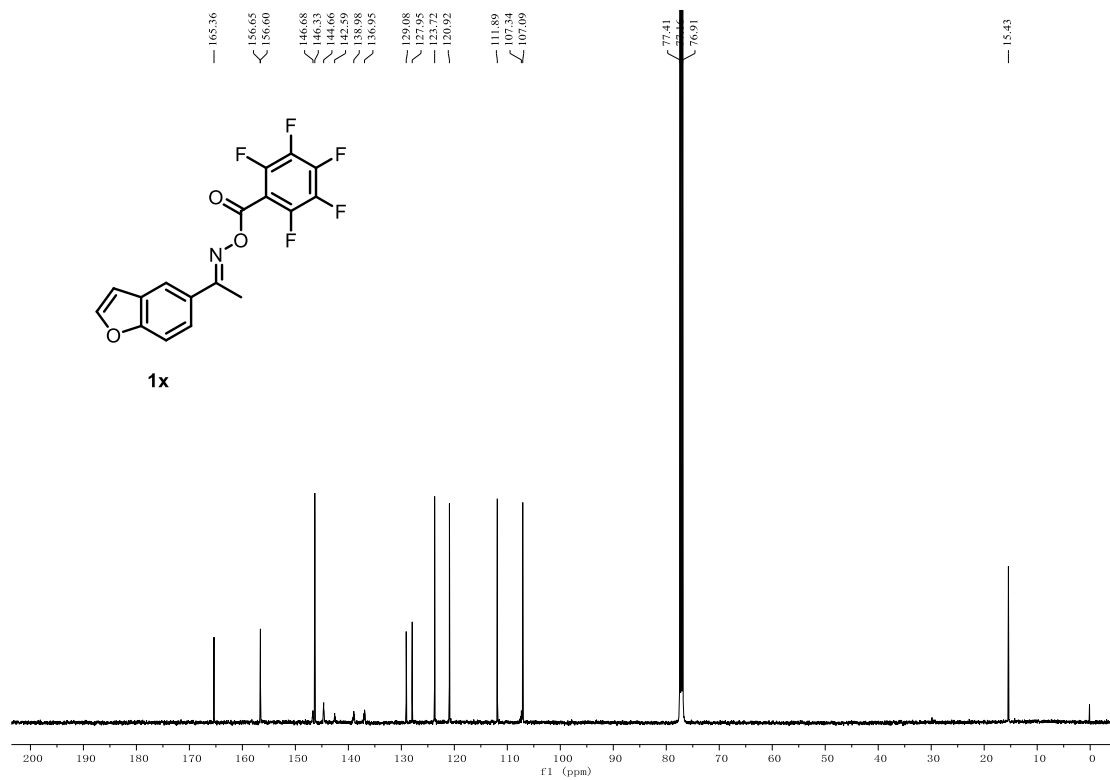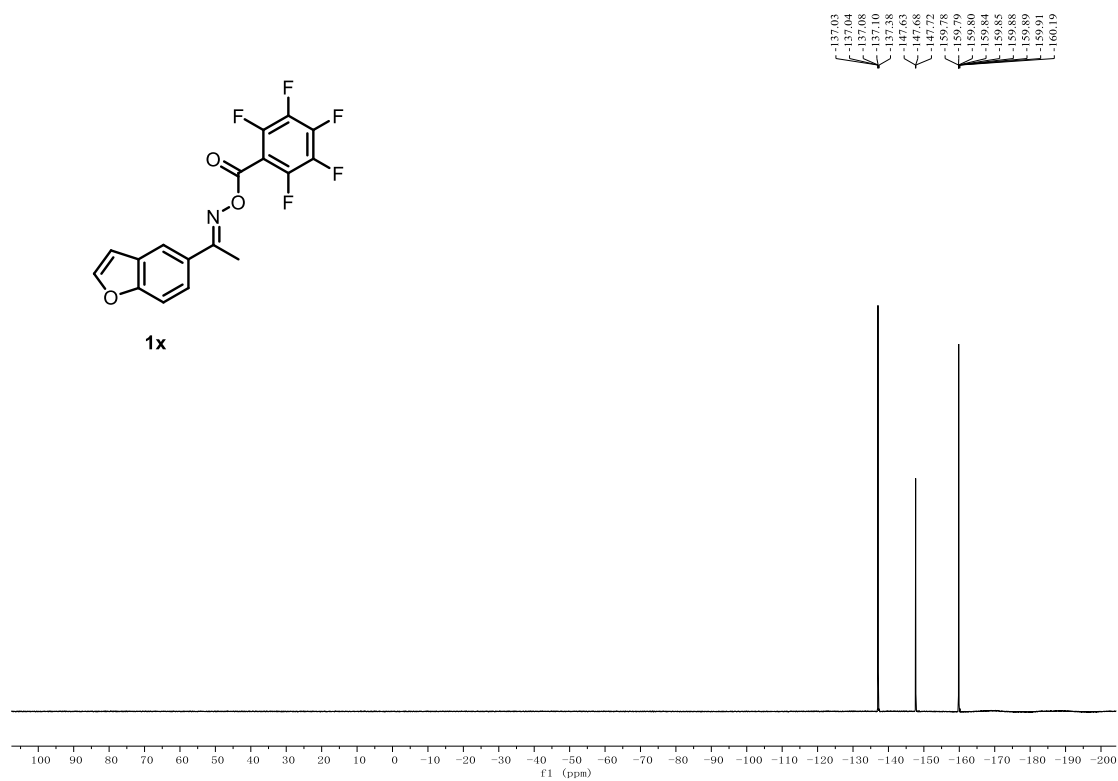



7.70  
7.68  
7.49  
7.48  
7.46  
7.43  
7.41  
7.40  
7.24  
7.23  
7.21  
7.17  
7.15  
7.13  
7.11

2.92  
2.90  
2.89  
2.70  
2.69  
2.67  
1.95  
1.94  
1.93  
1.92  
1.92  
1.89  
1.89

— 0.00

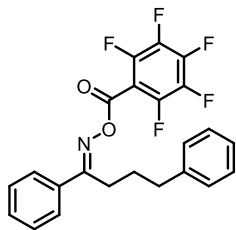

1a-1

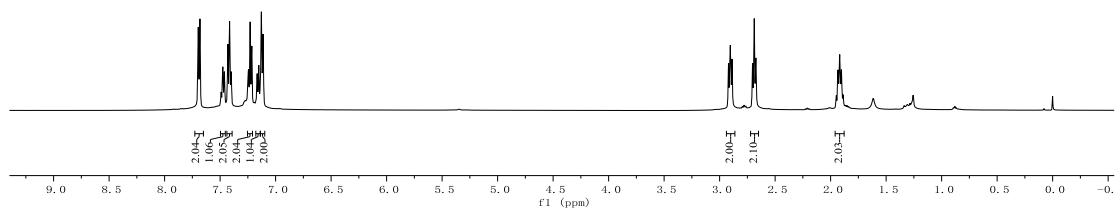

168.76  
156.64  
146.65  
144.61  
142.98  
140.98  
138.95  
136.92  
133.17  
131.24  
128.96  
128.46  
127.55  
126.23  
107.17

77.41  
76.91  
35.71  
28.34  
28.30

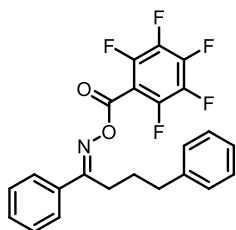

1a-1

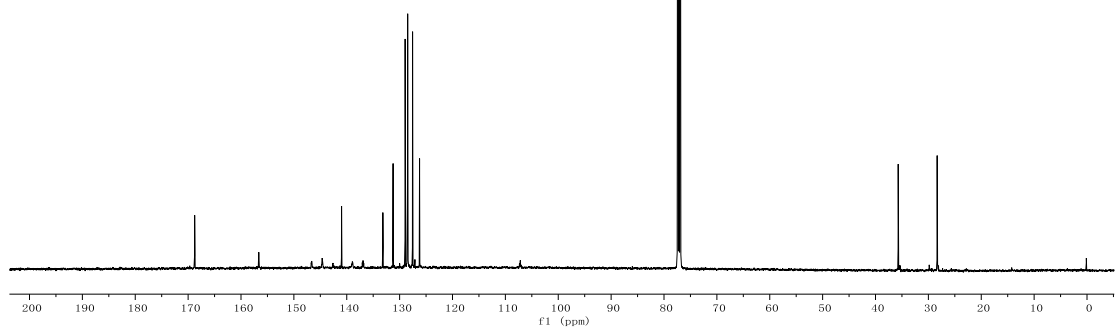

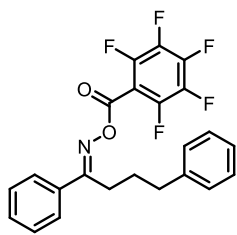

1a-1

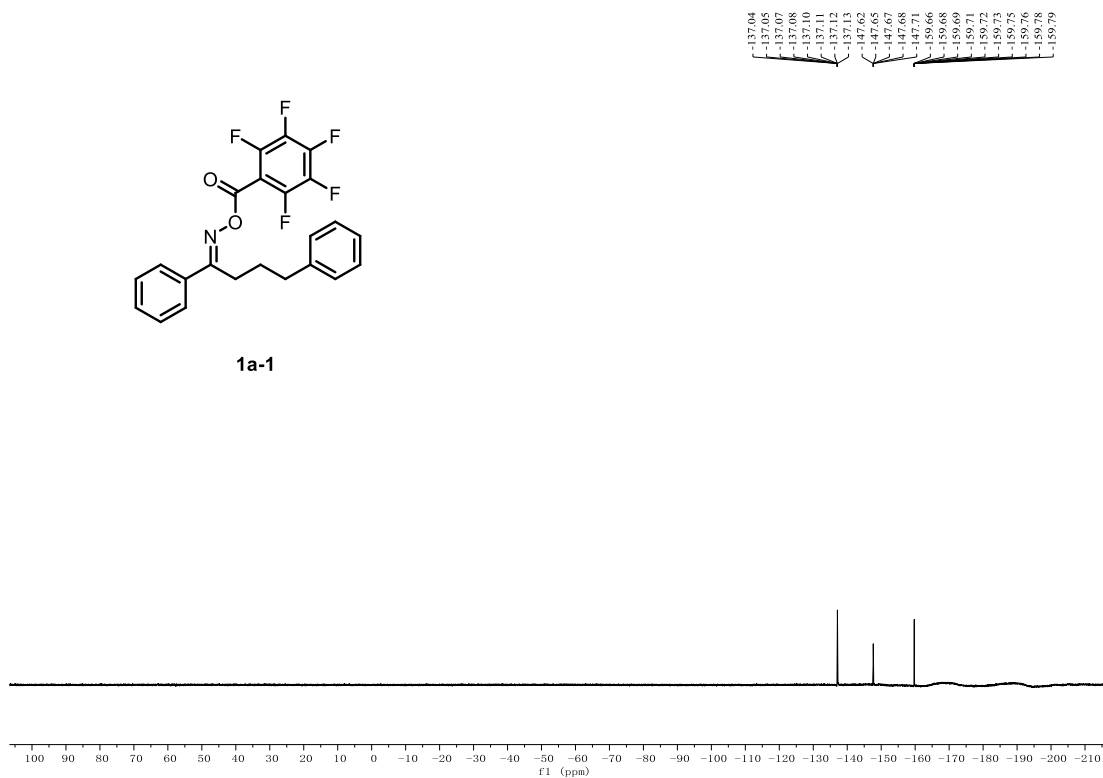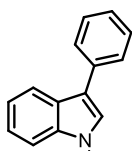

3a

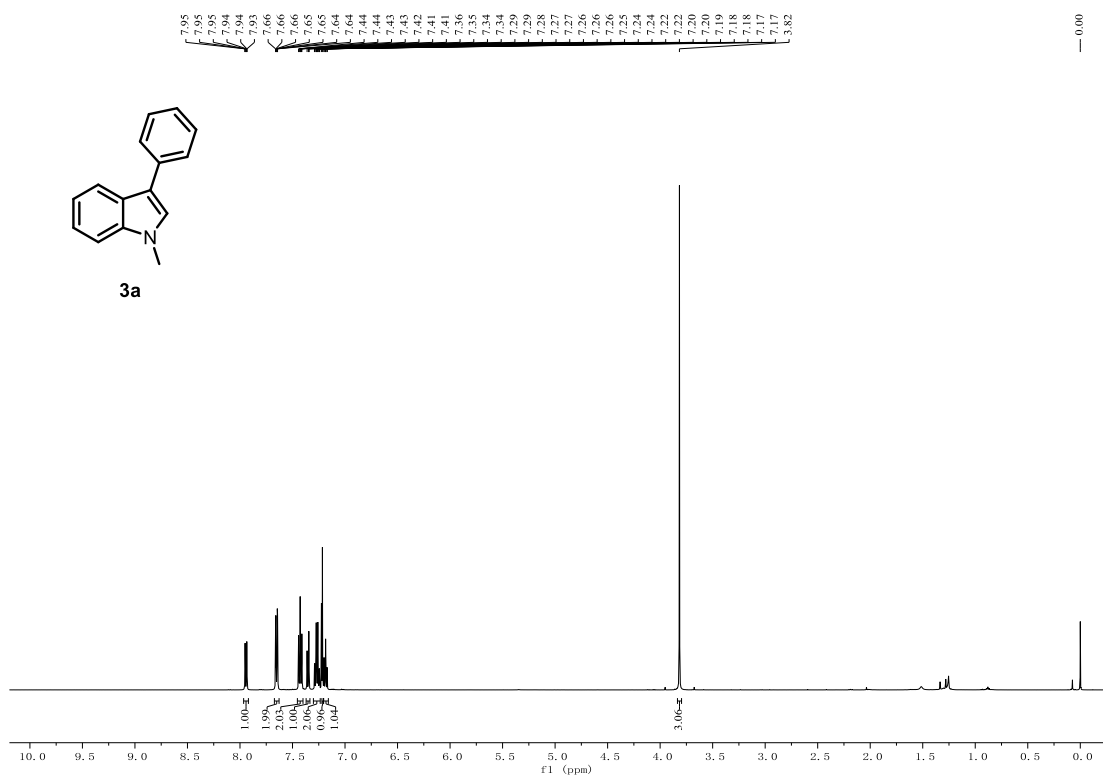

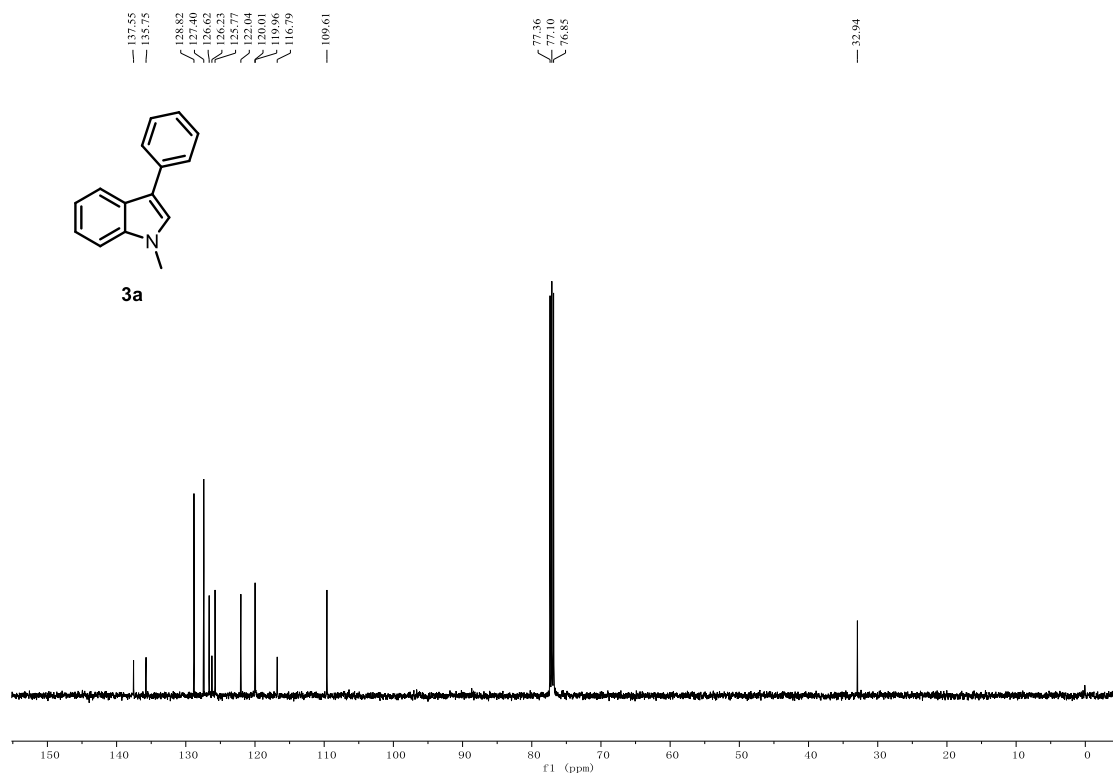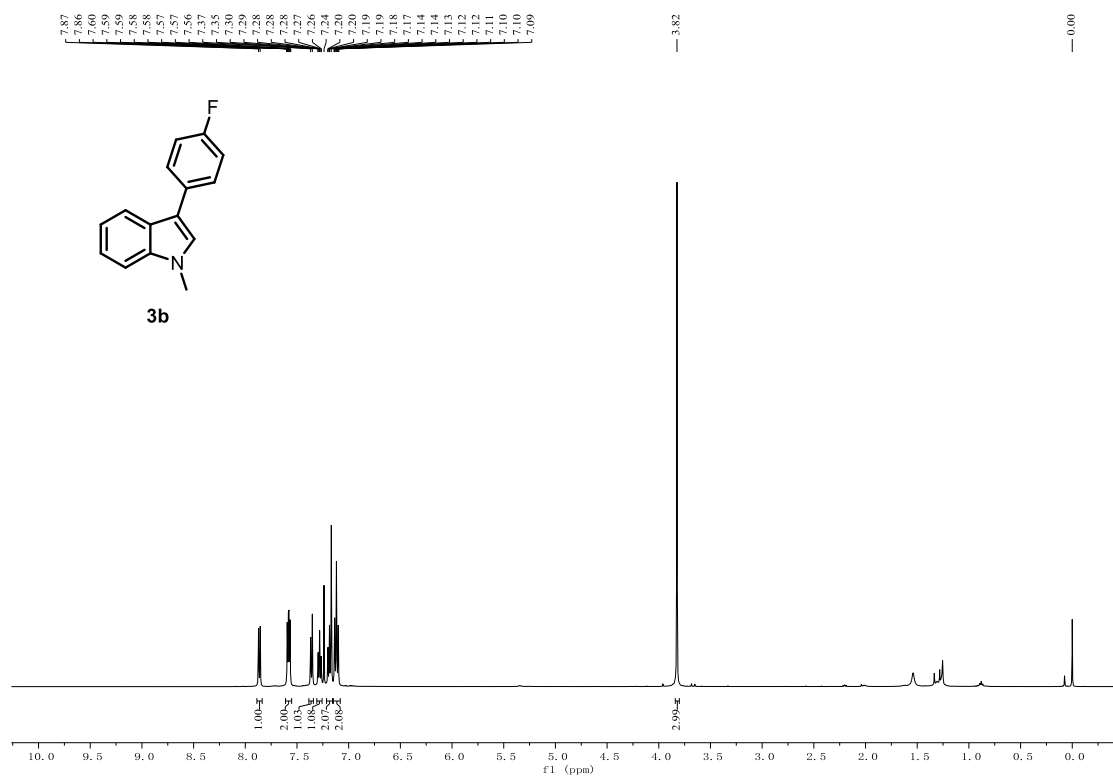

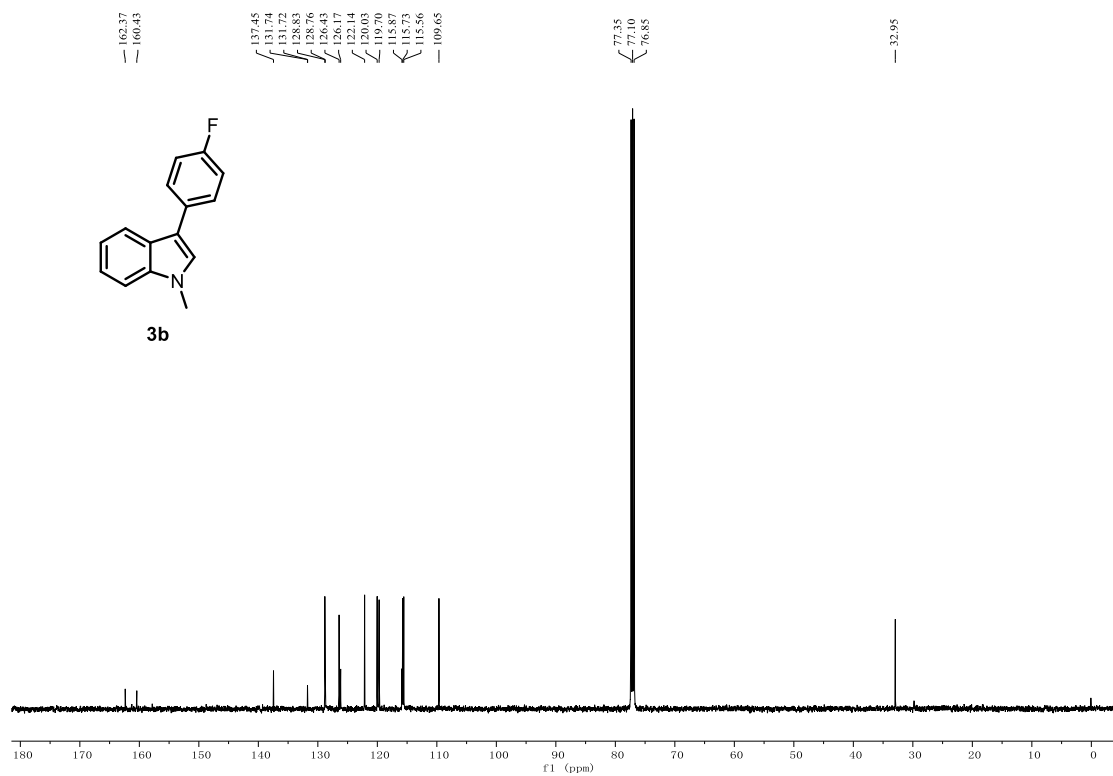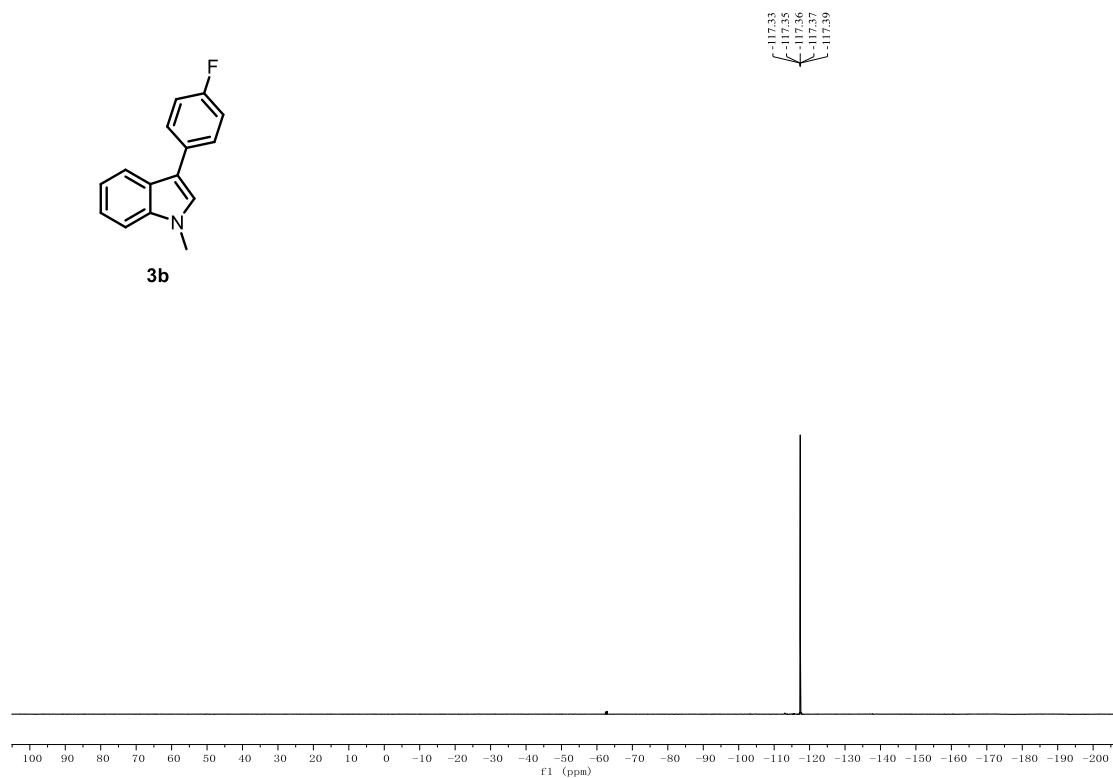

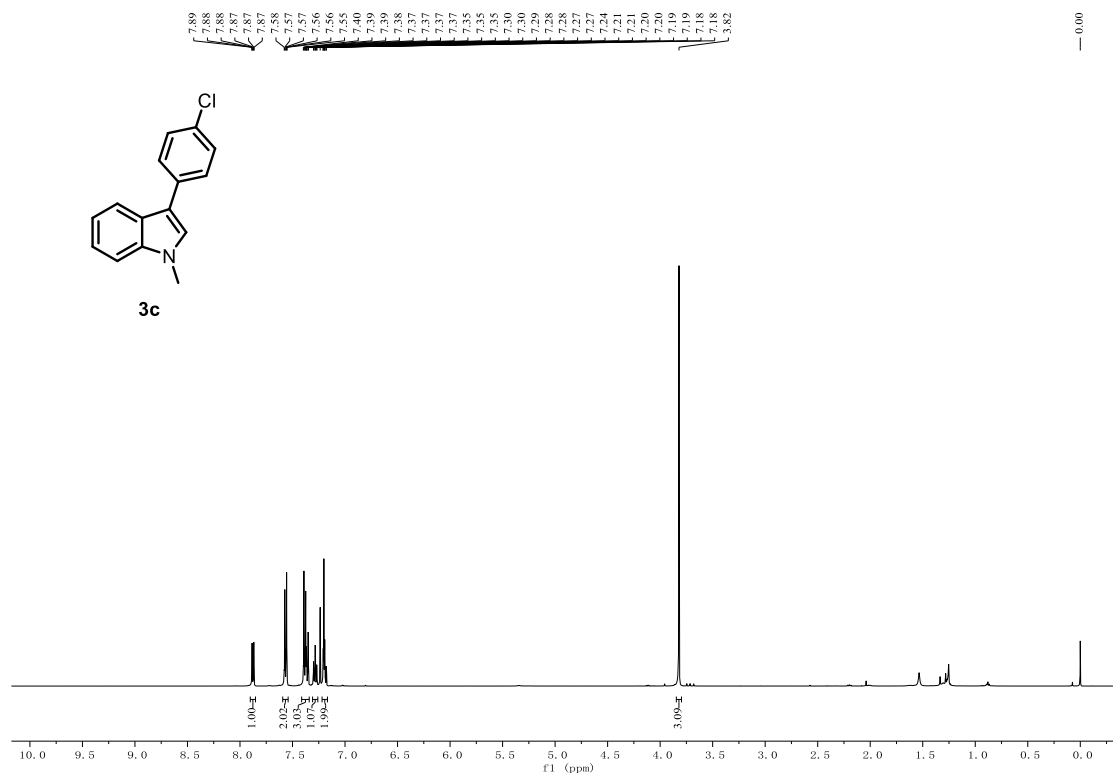

— 0.00

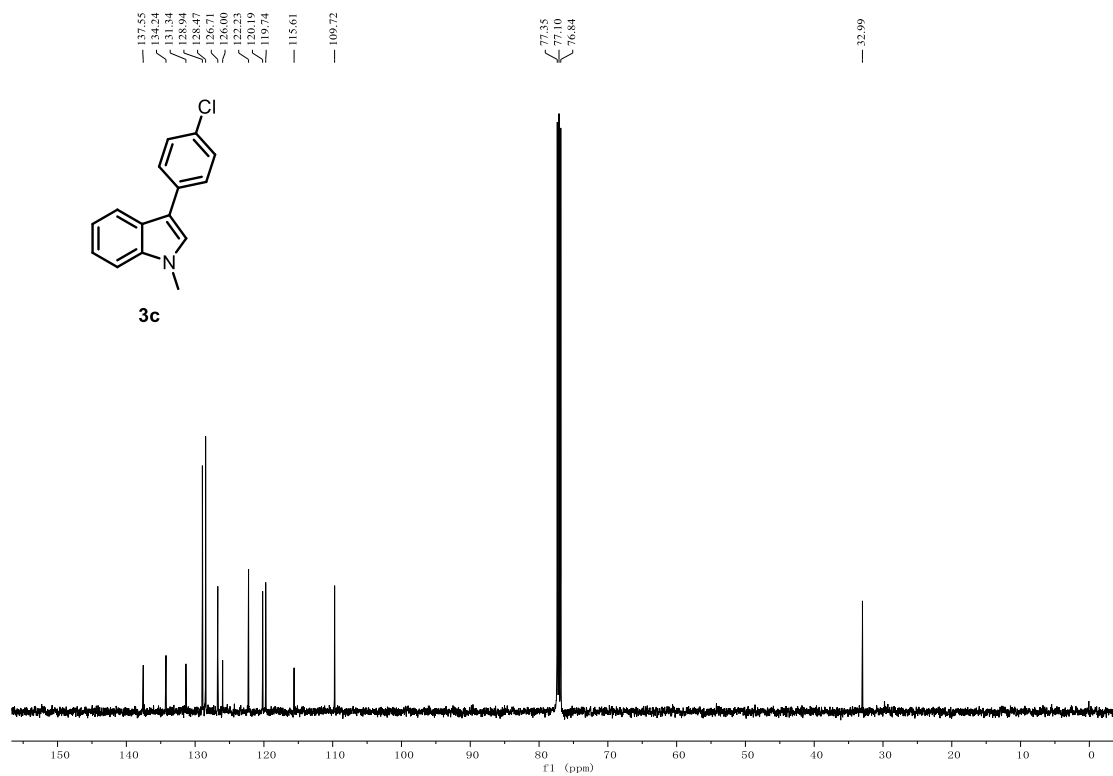

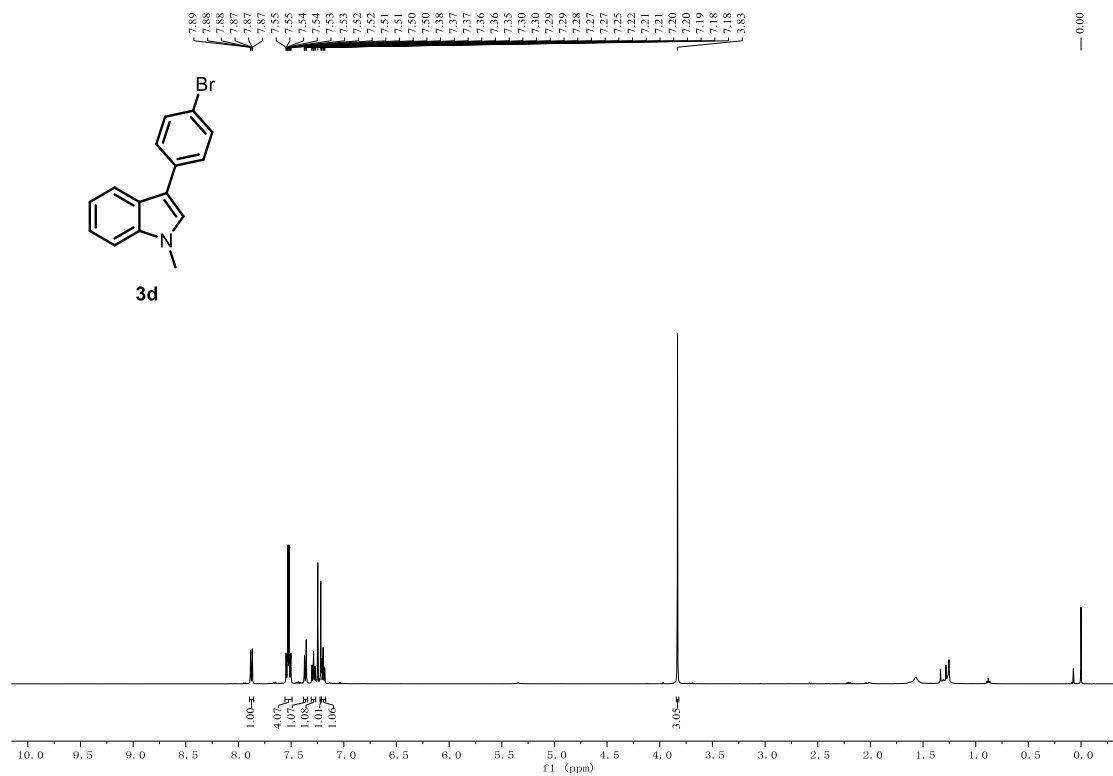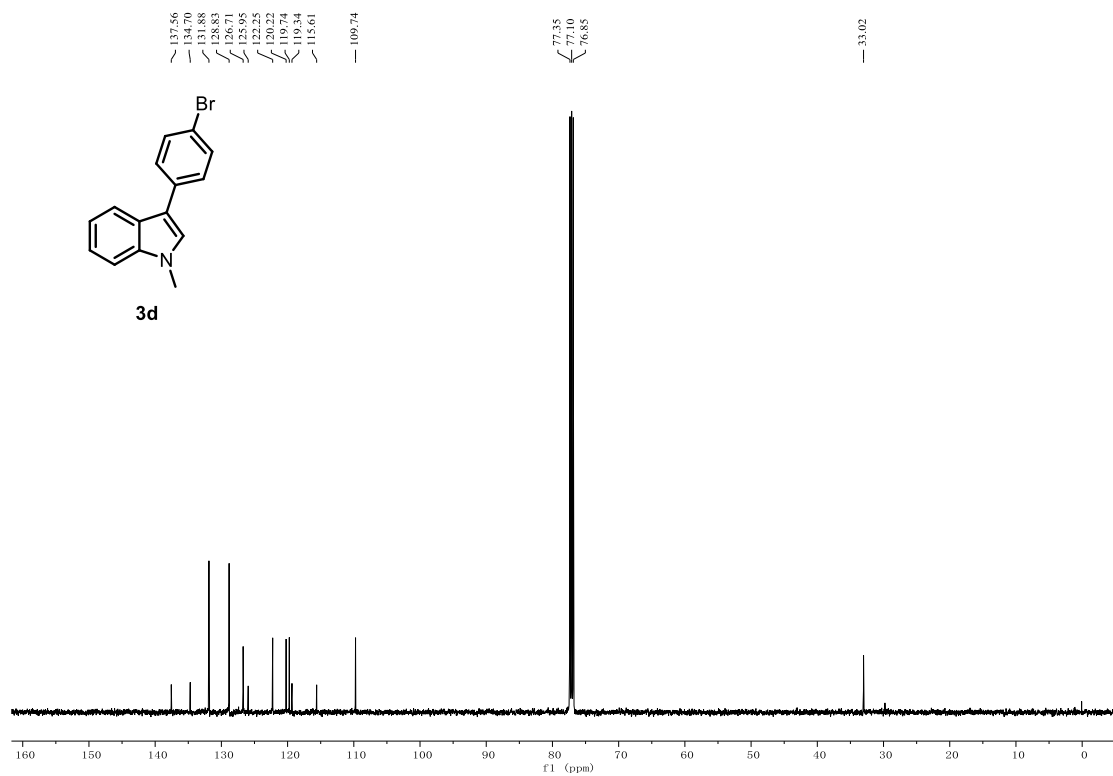

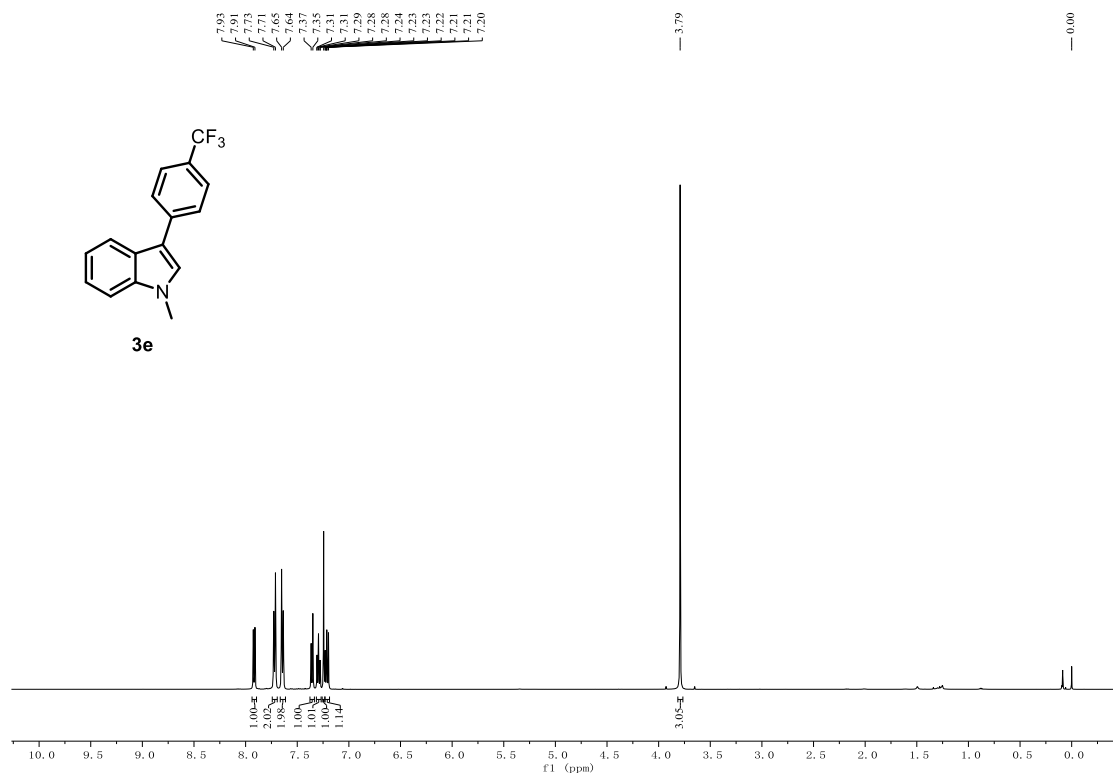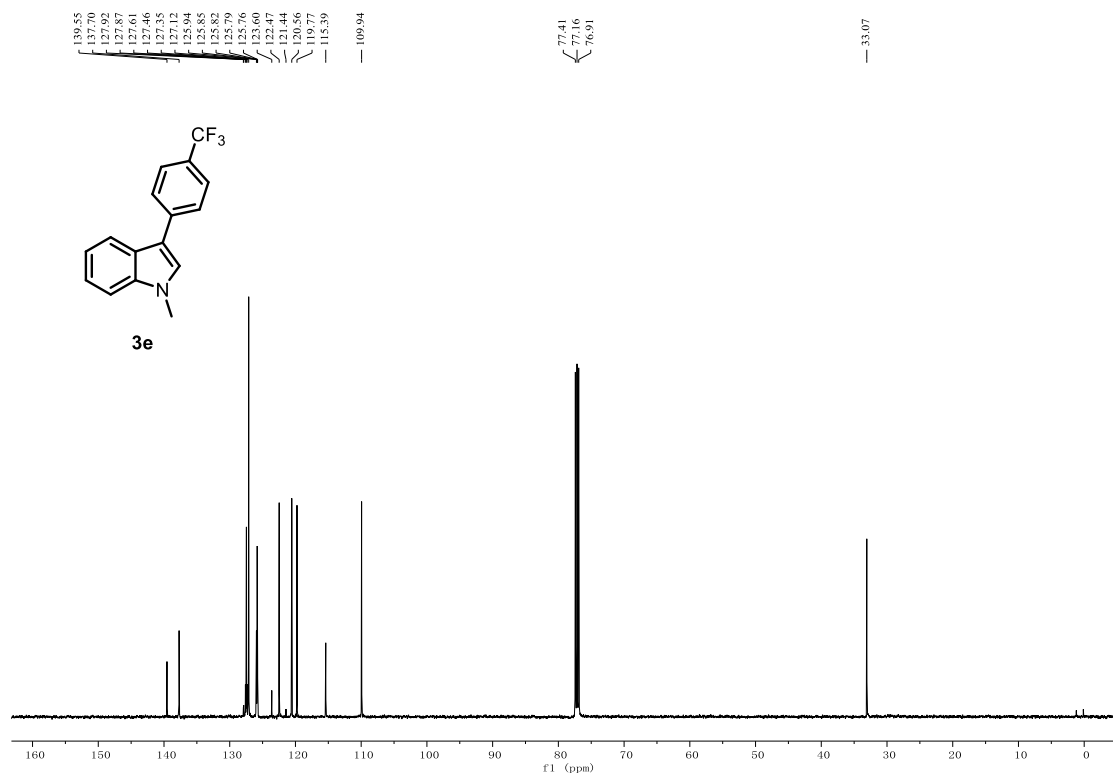

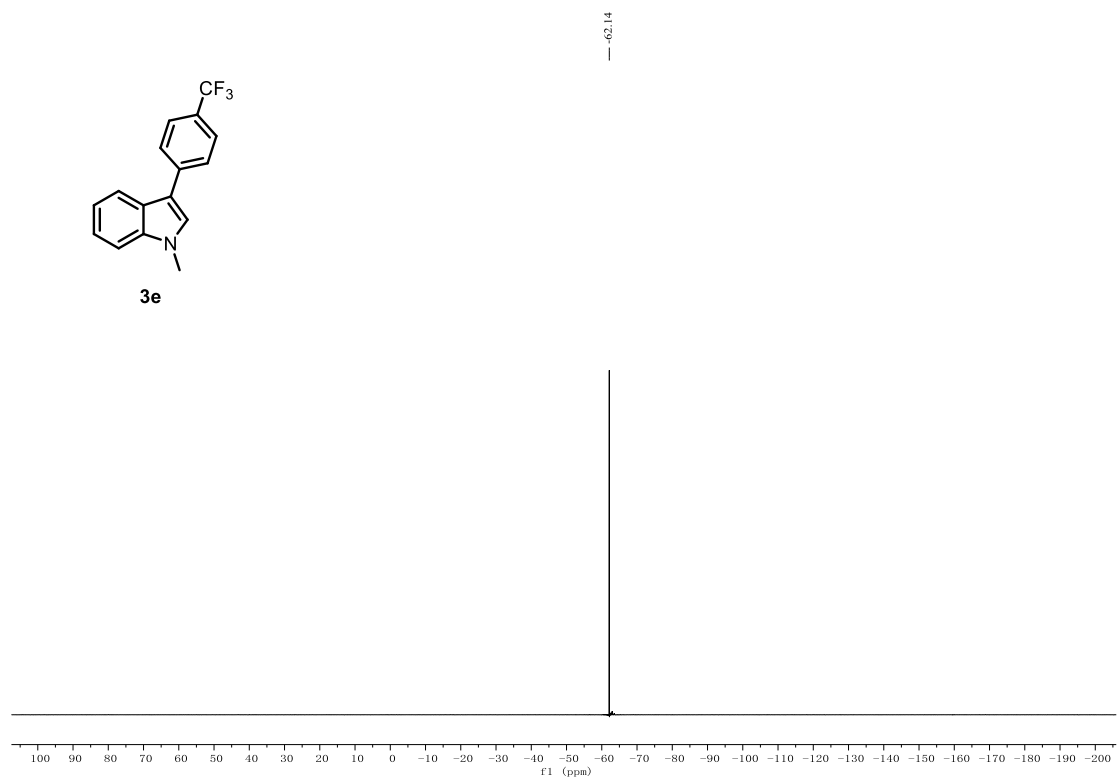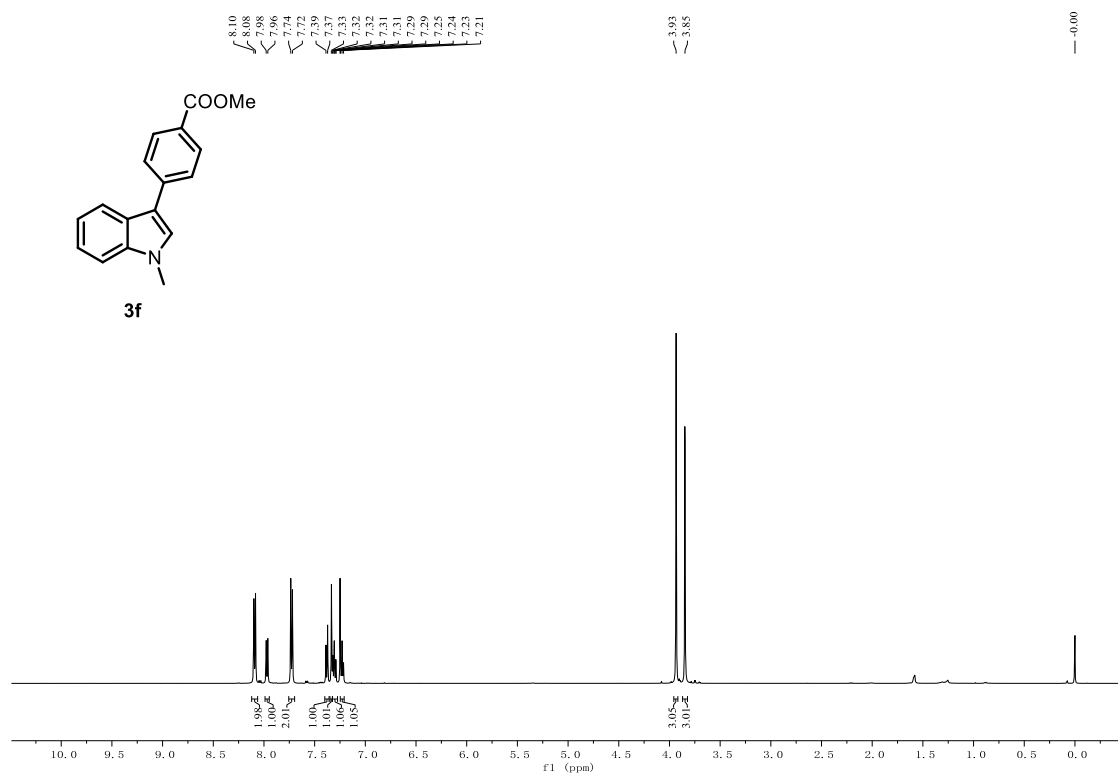



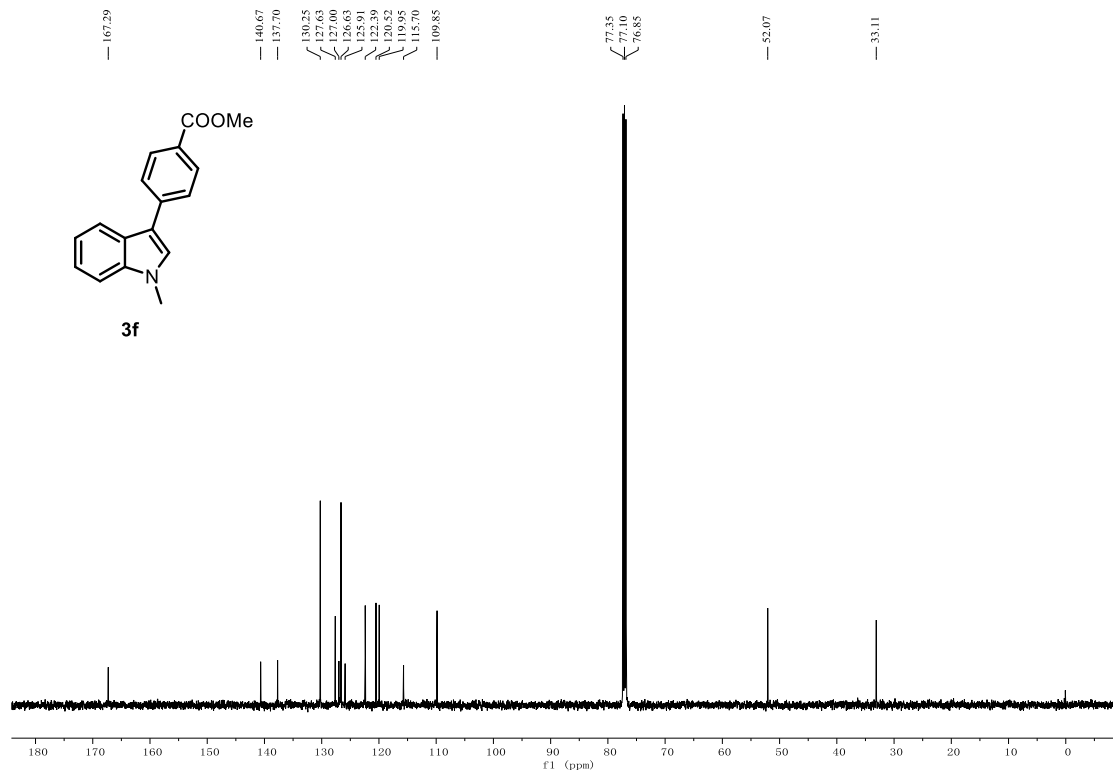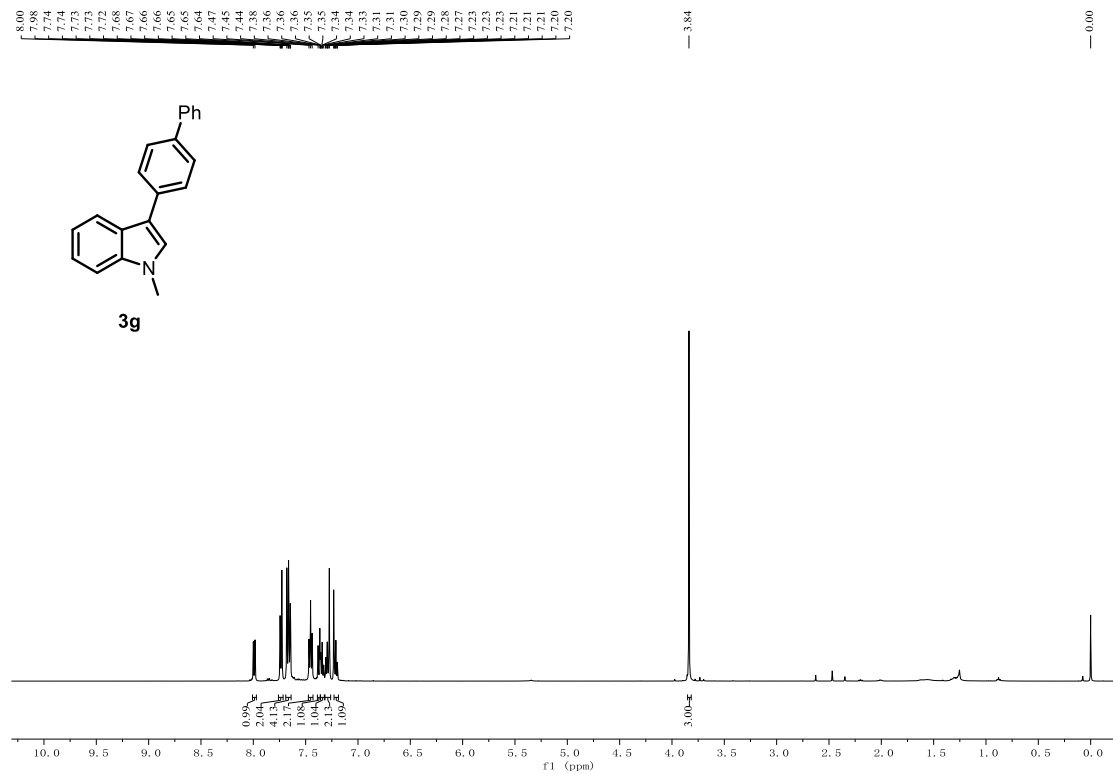

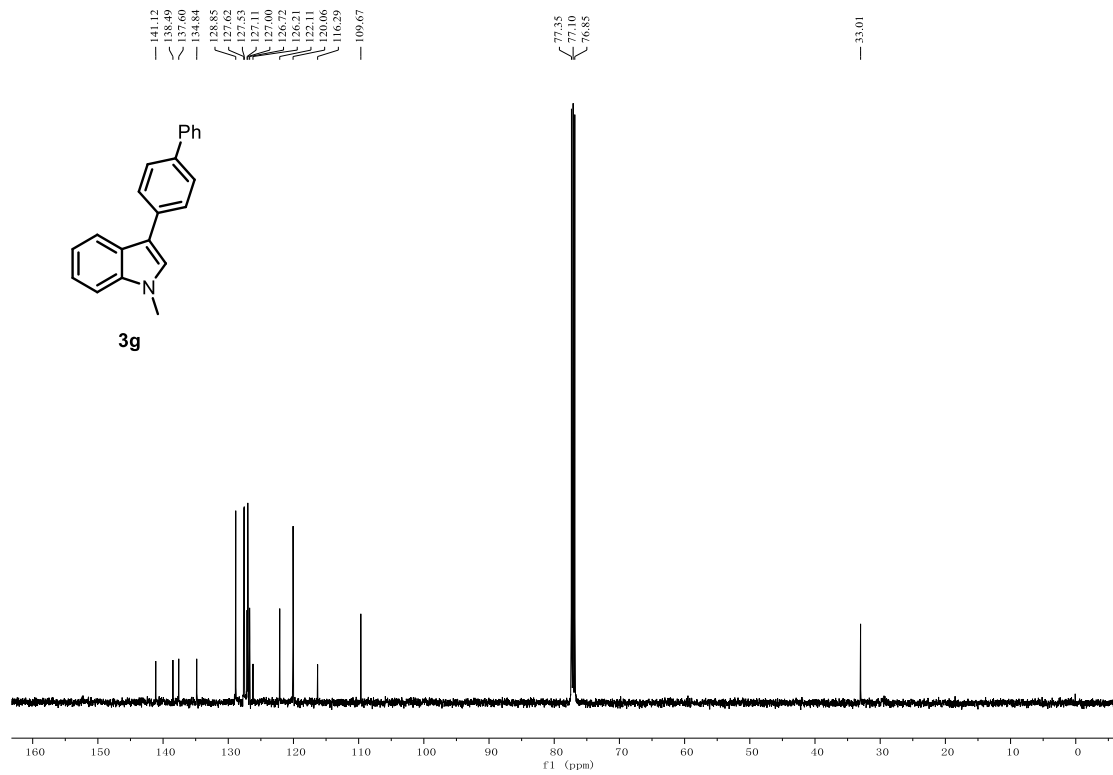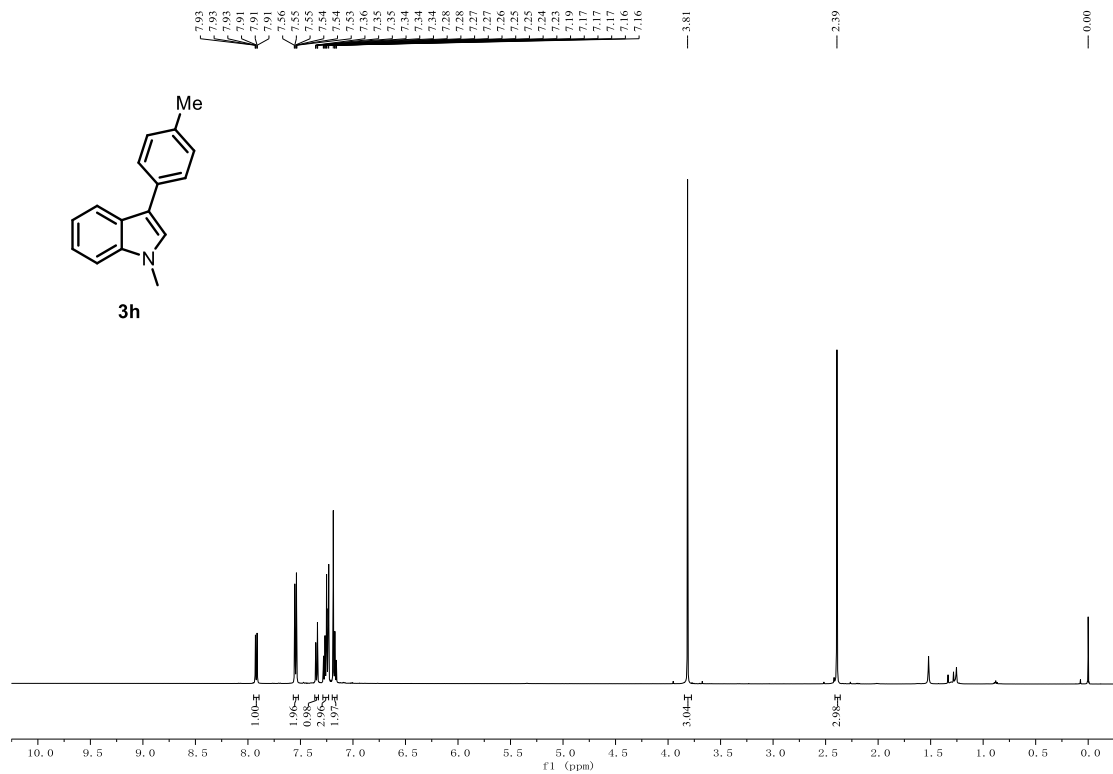

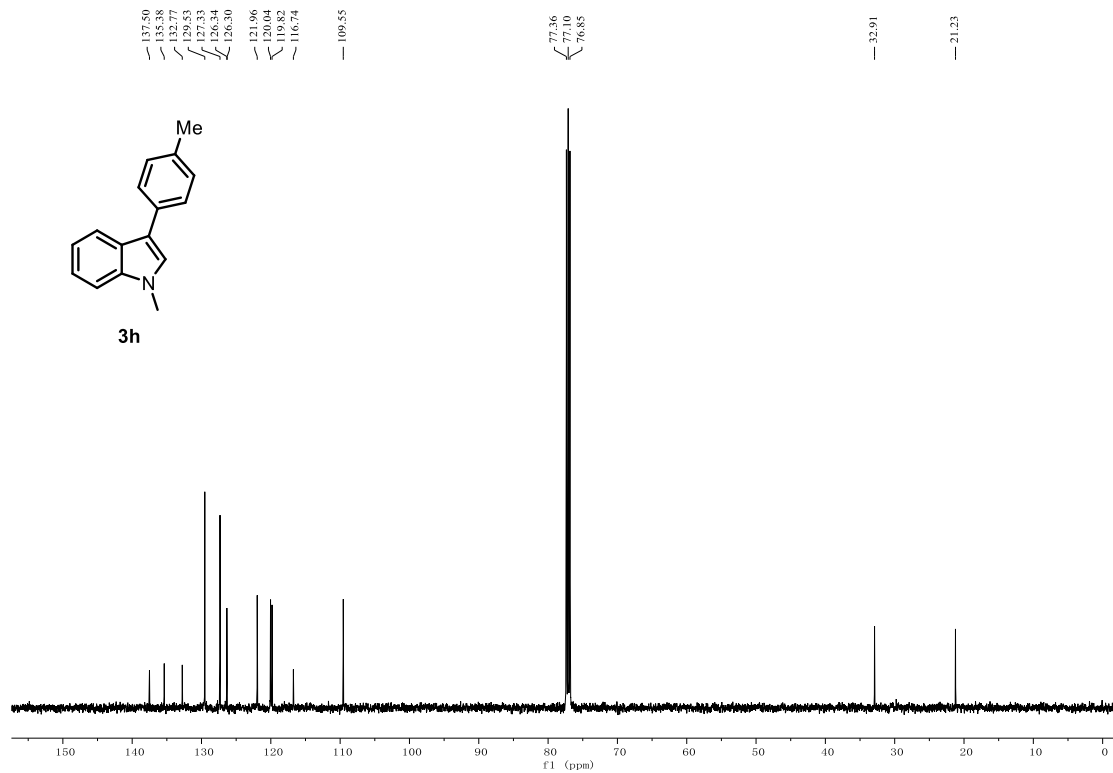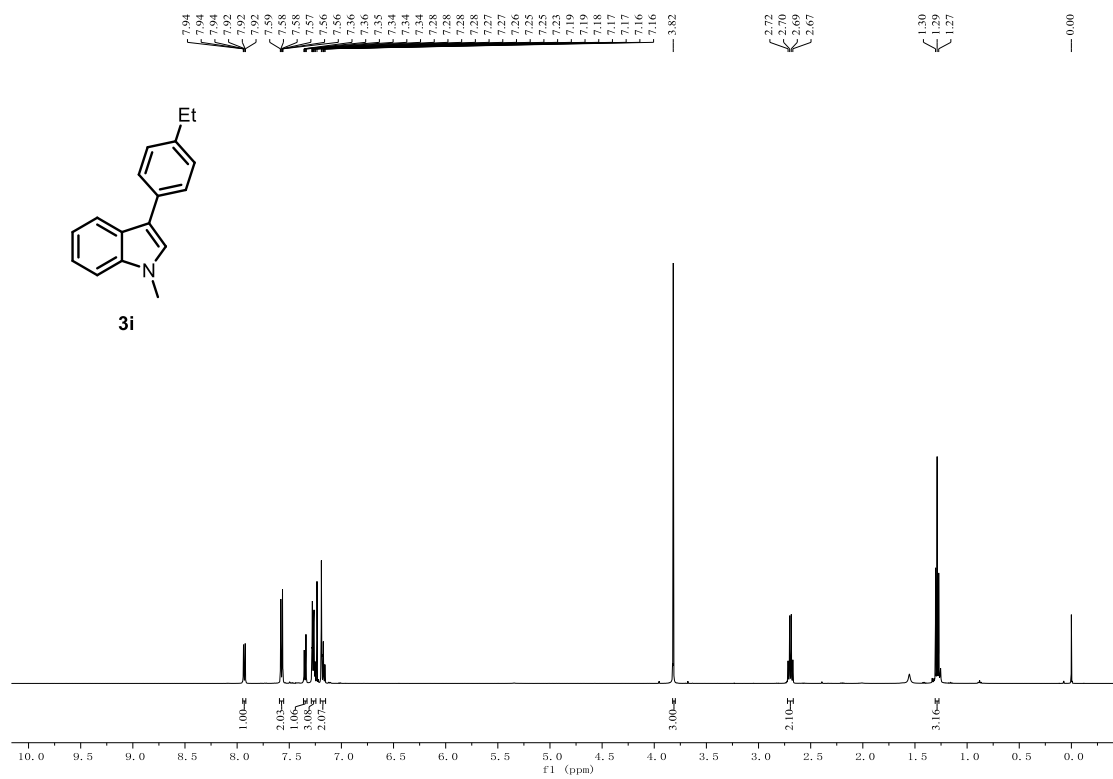

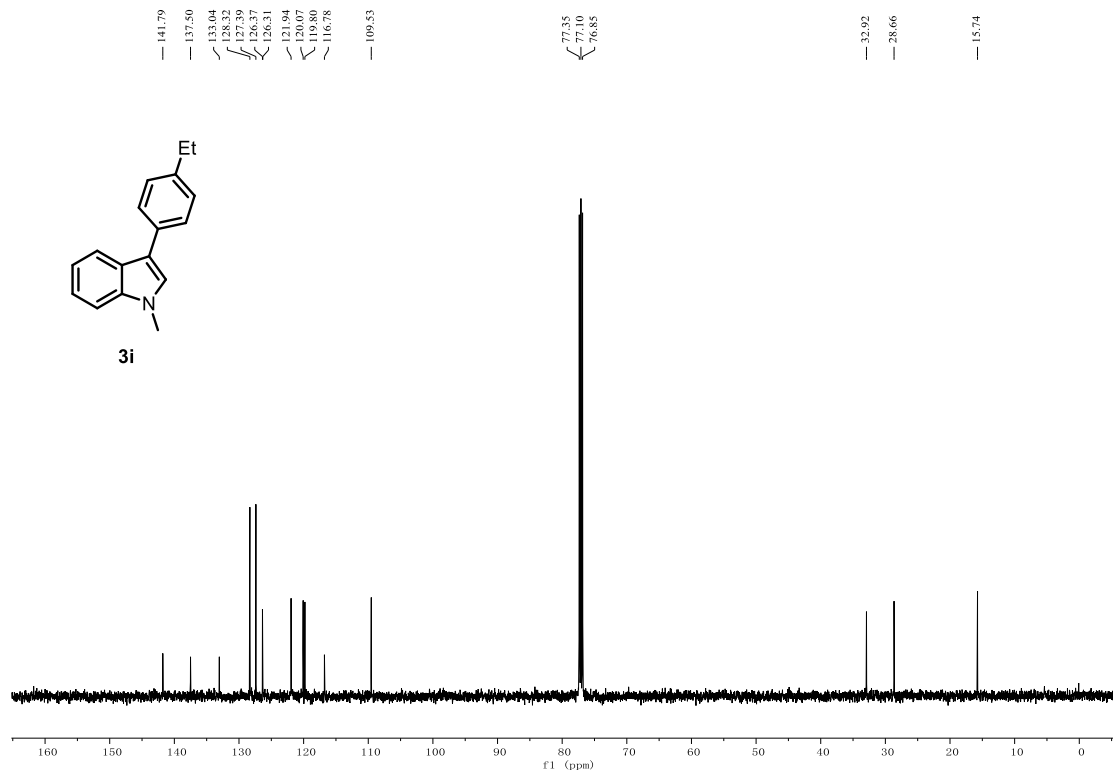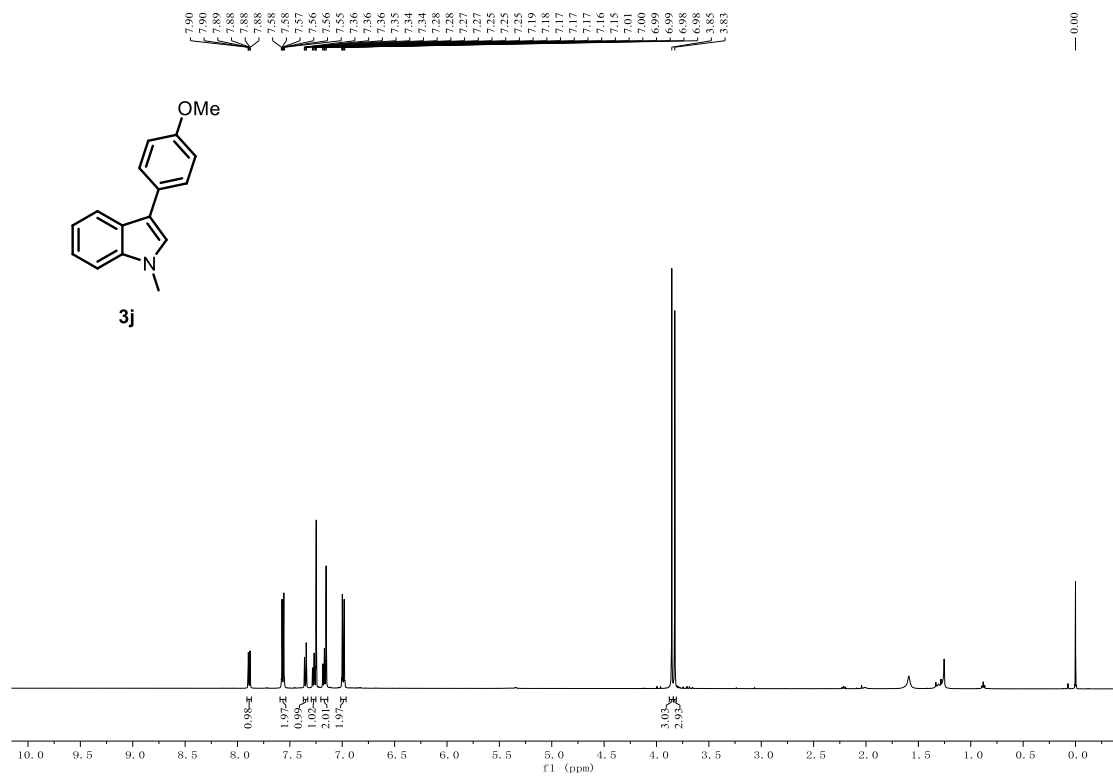

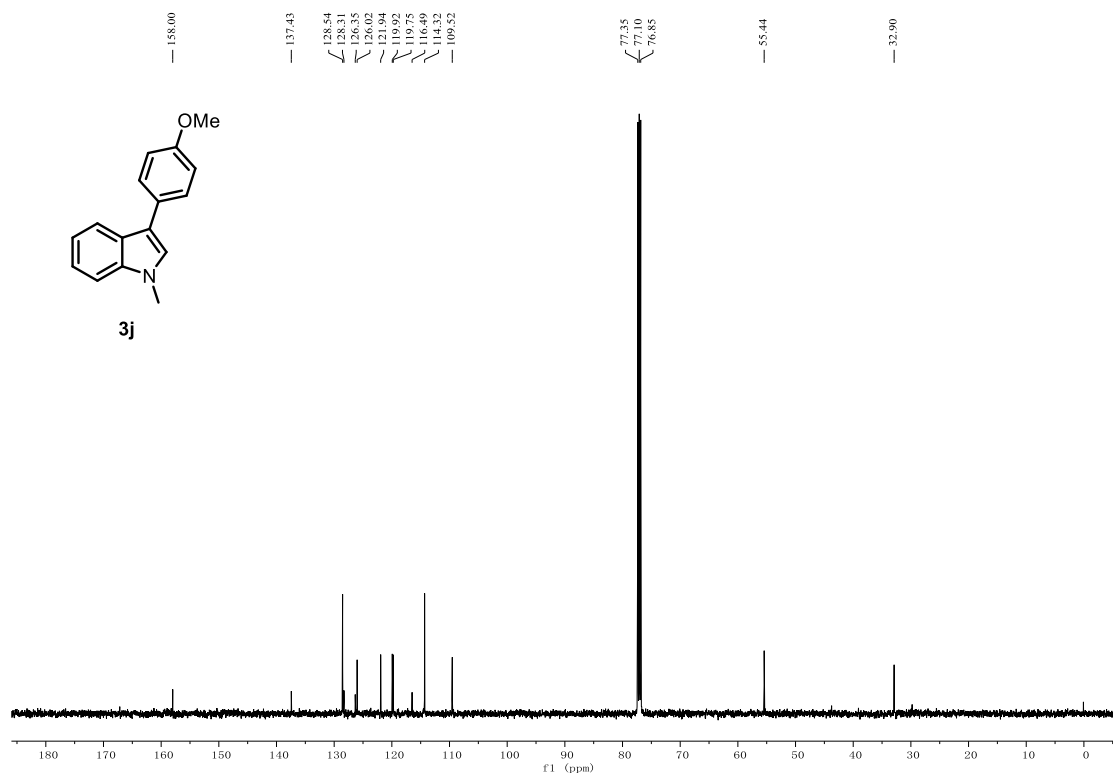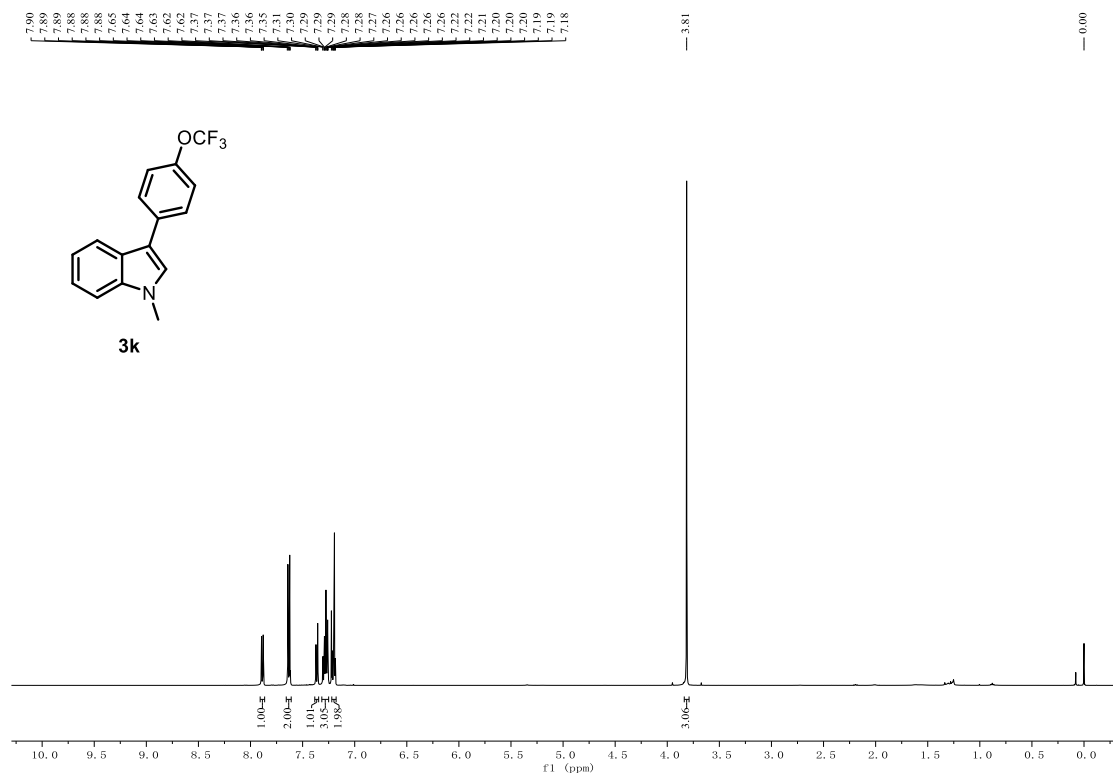

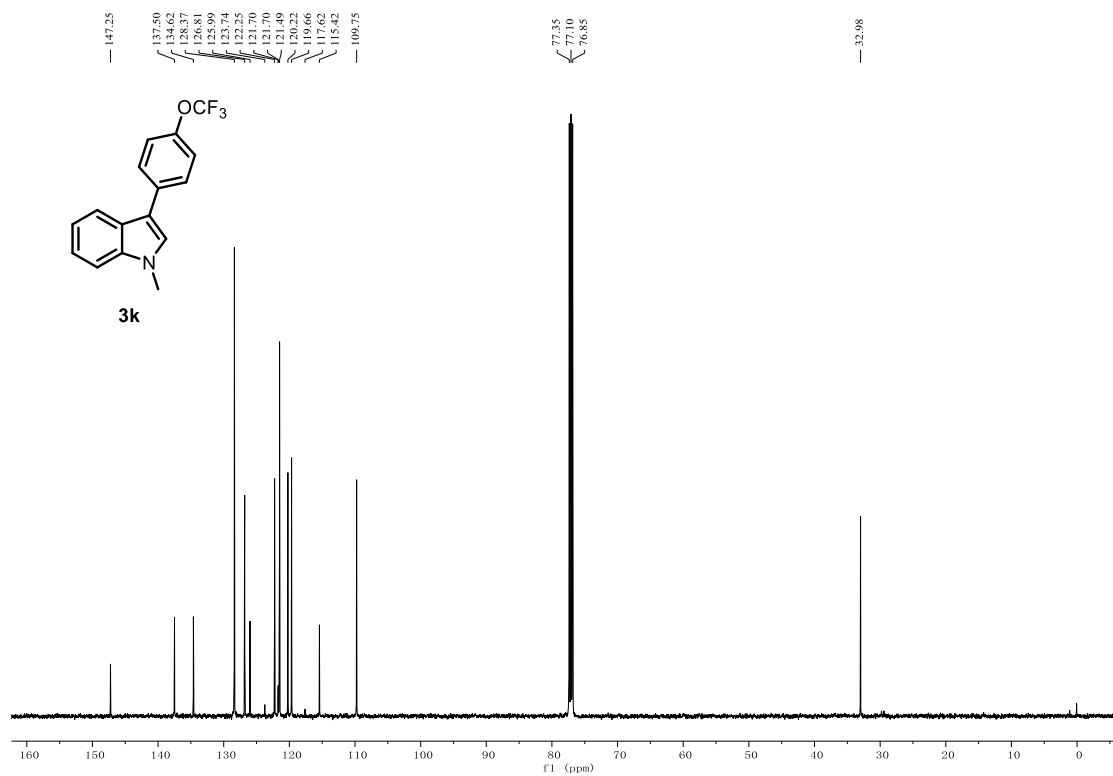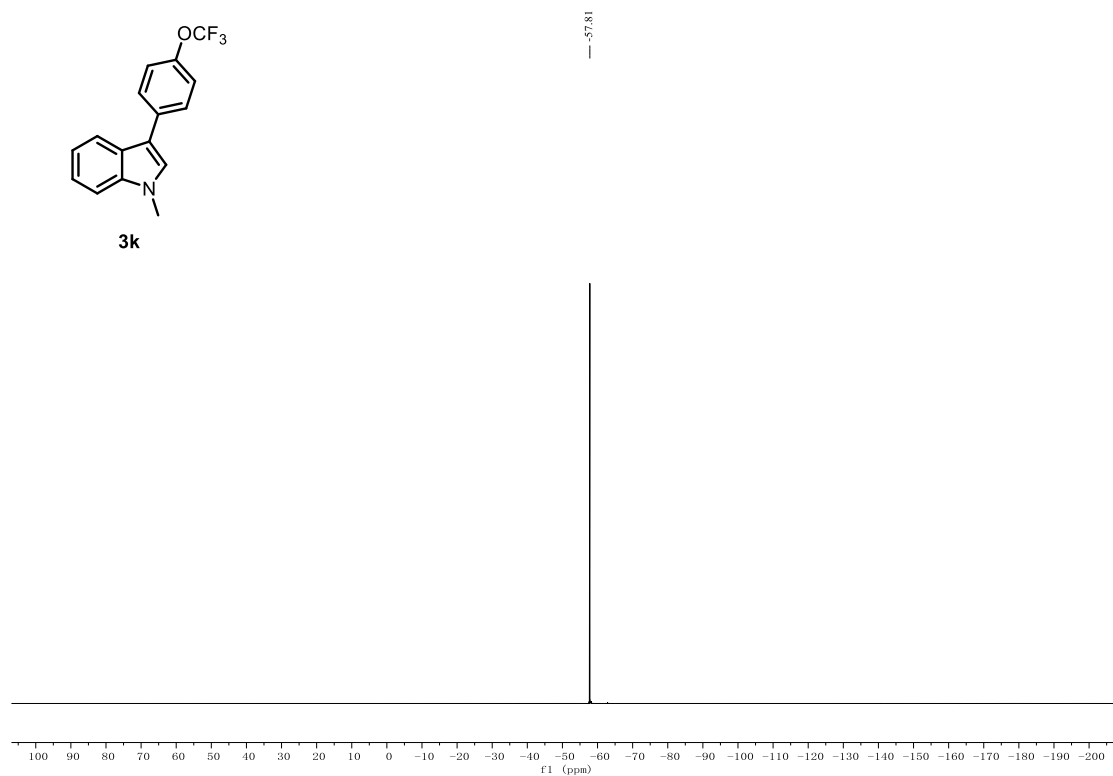

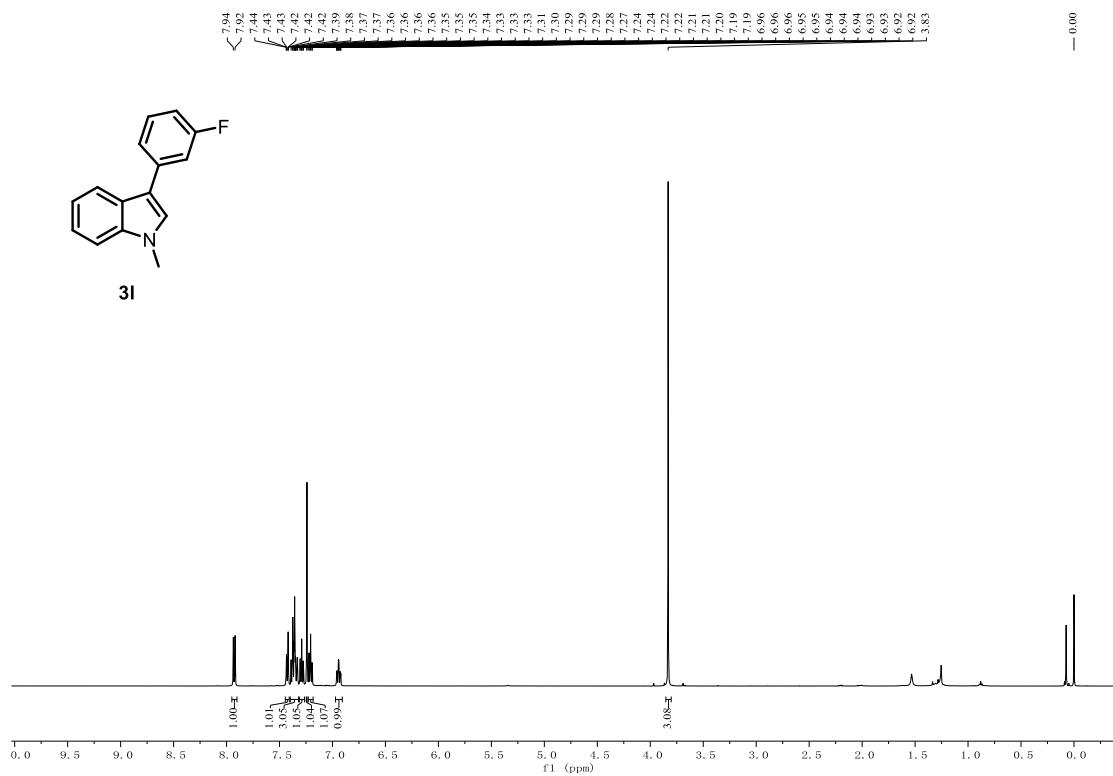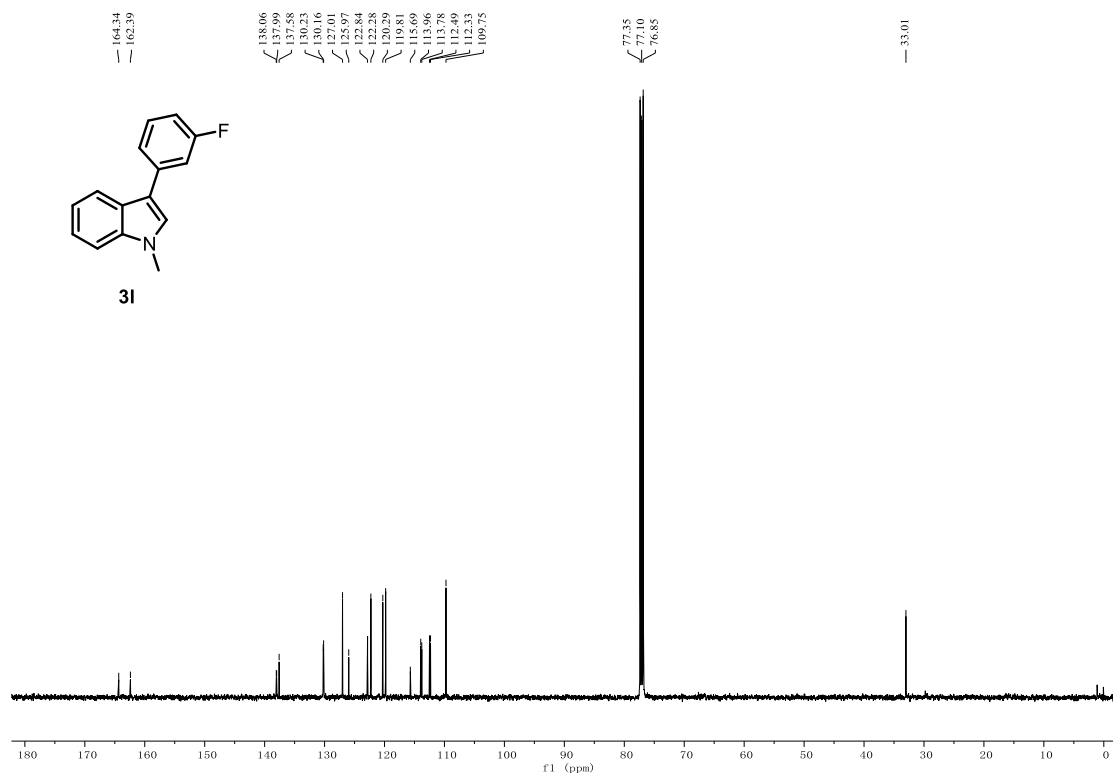

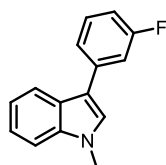

31

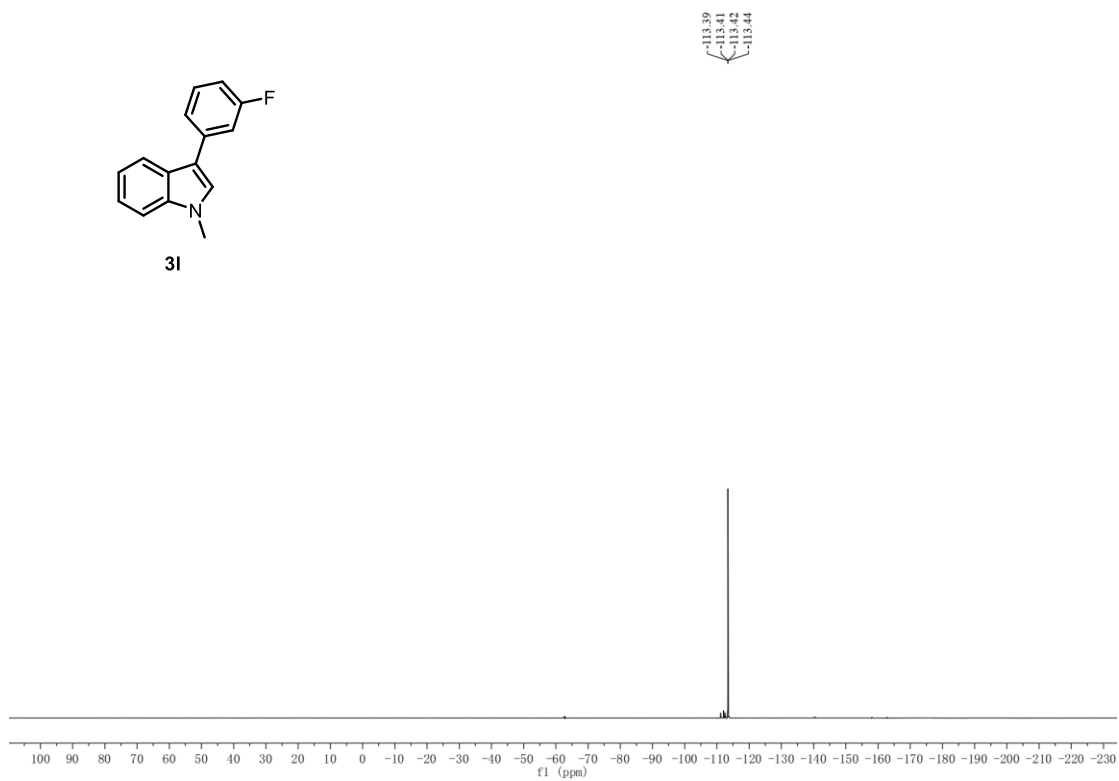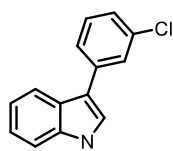

3m

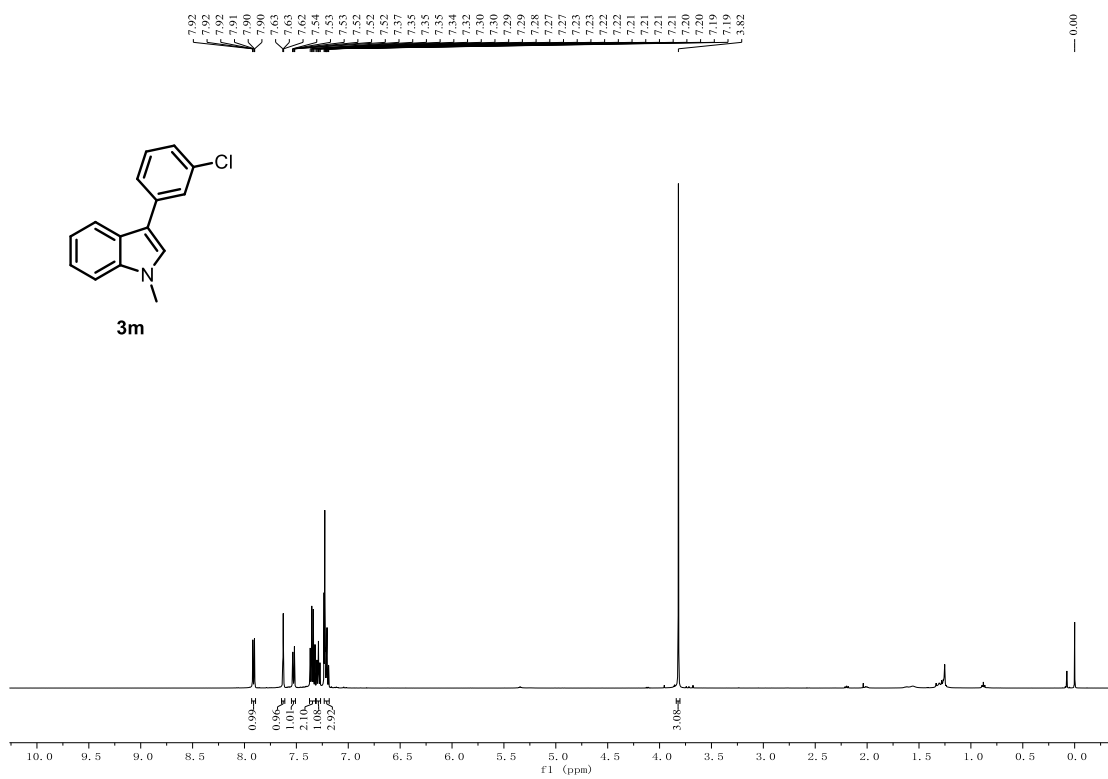



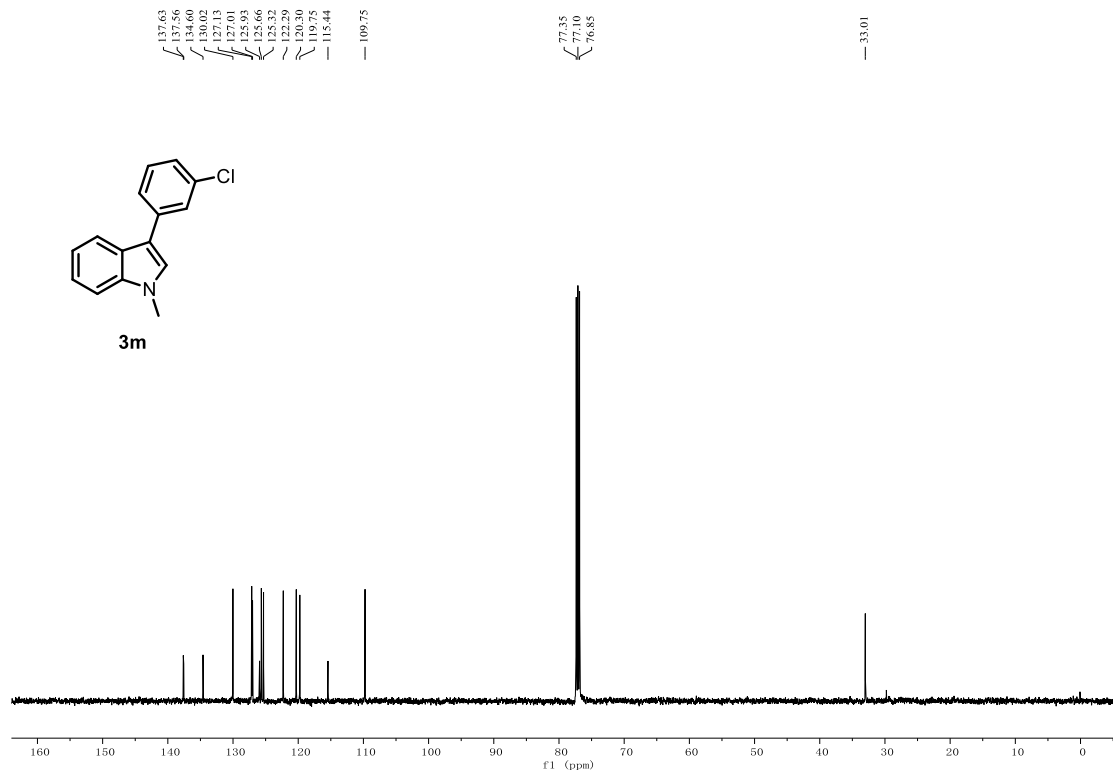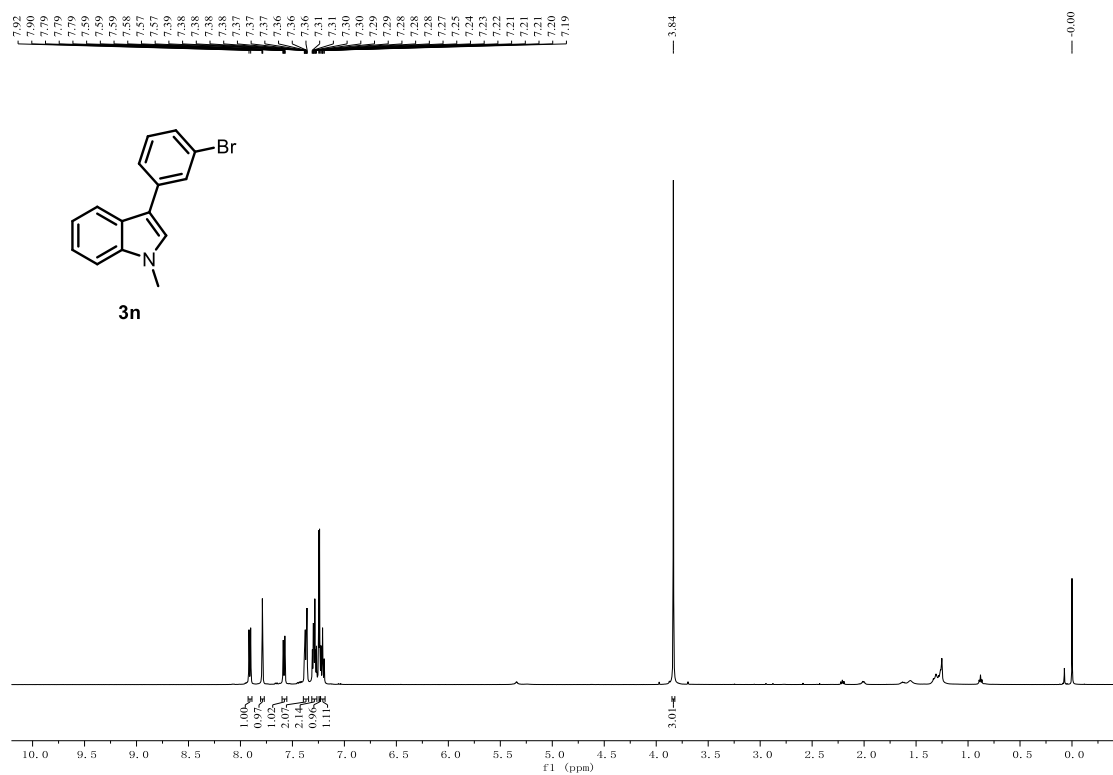

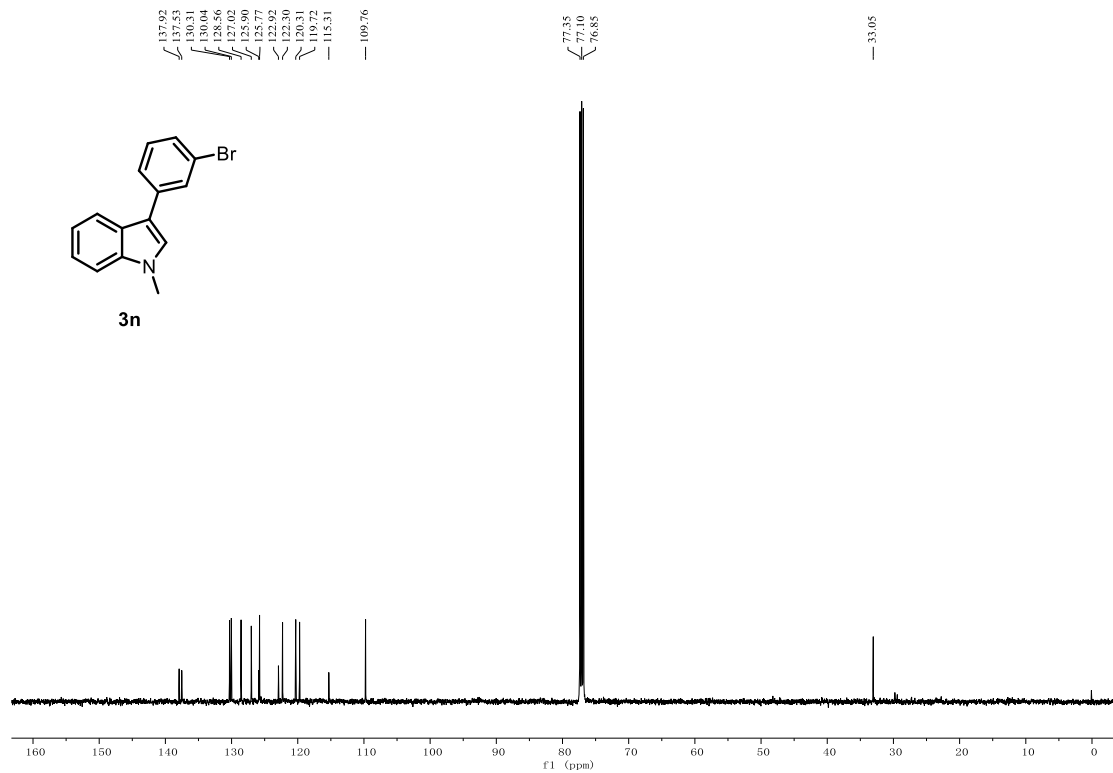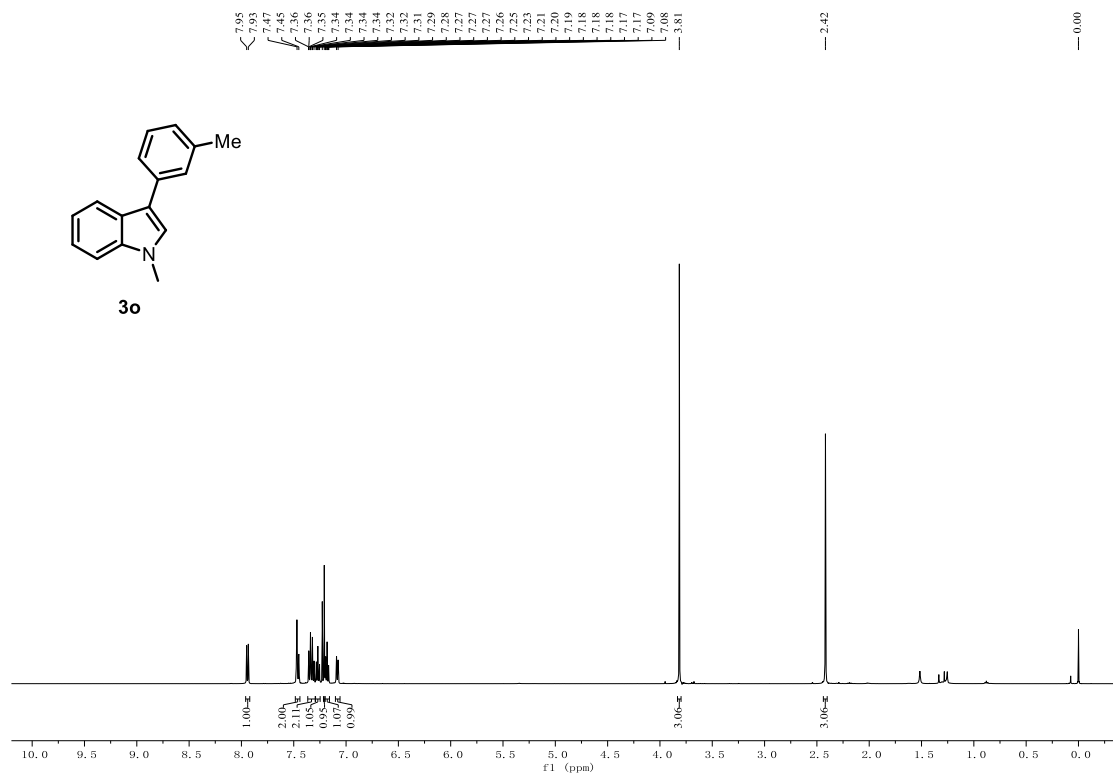

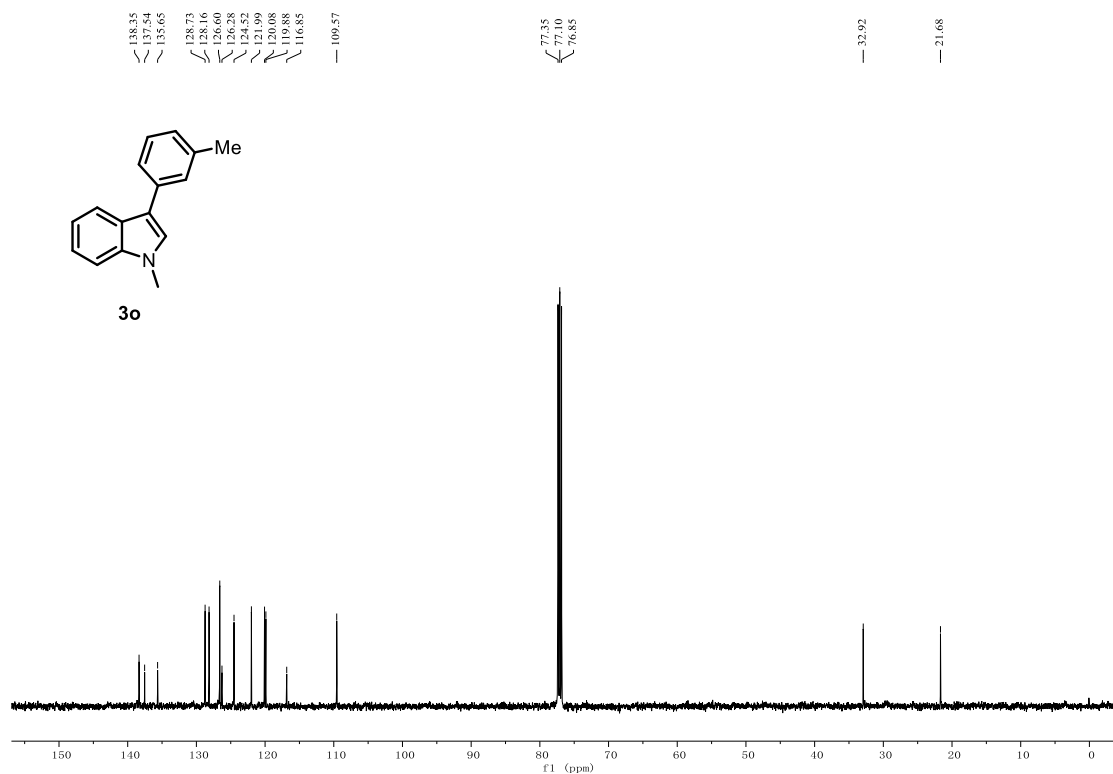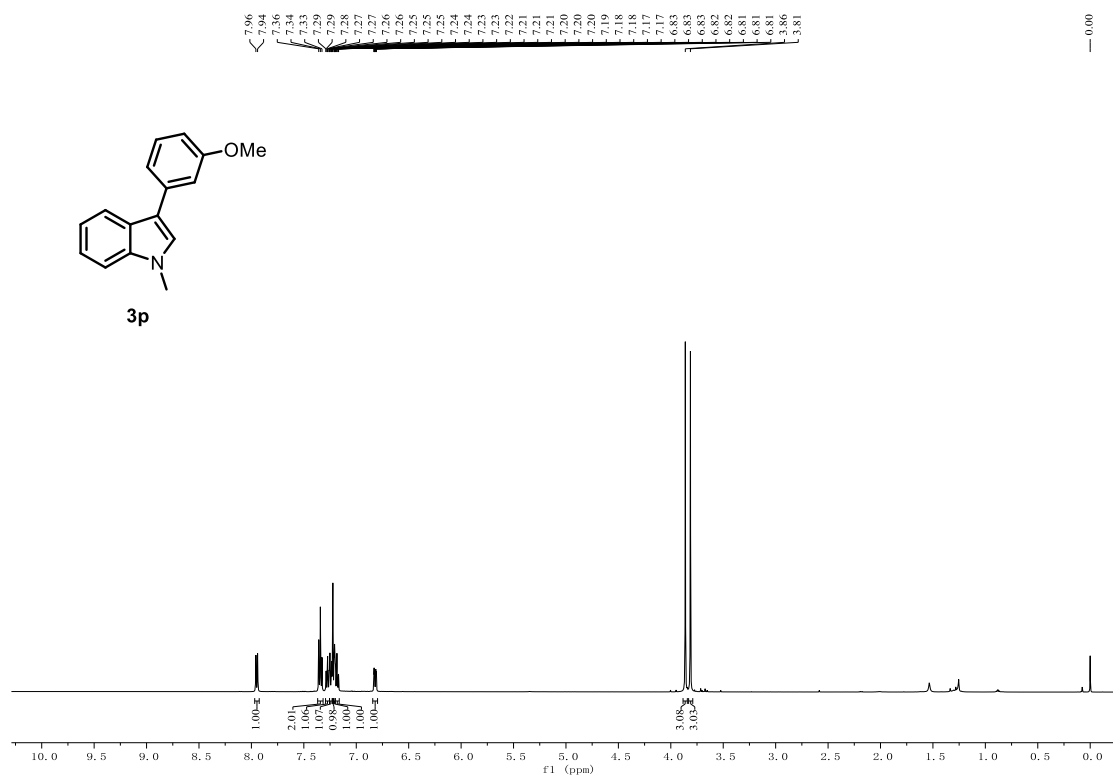

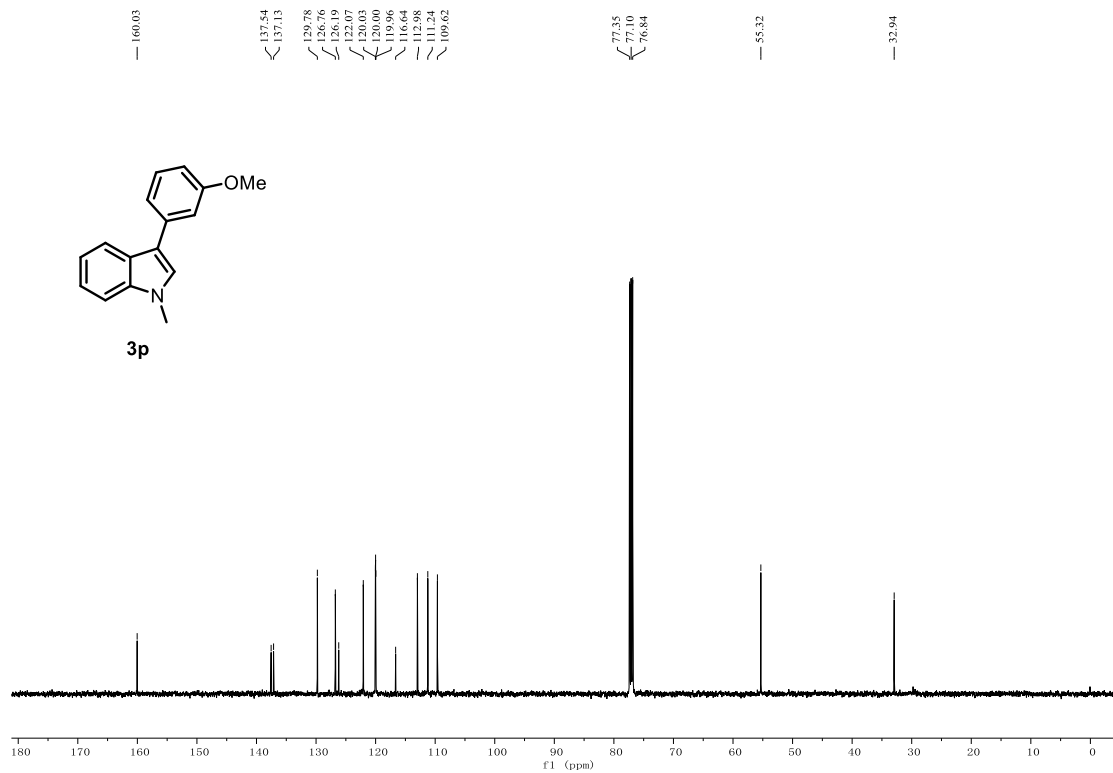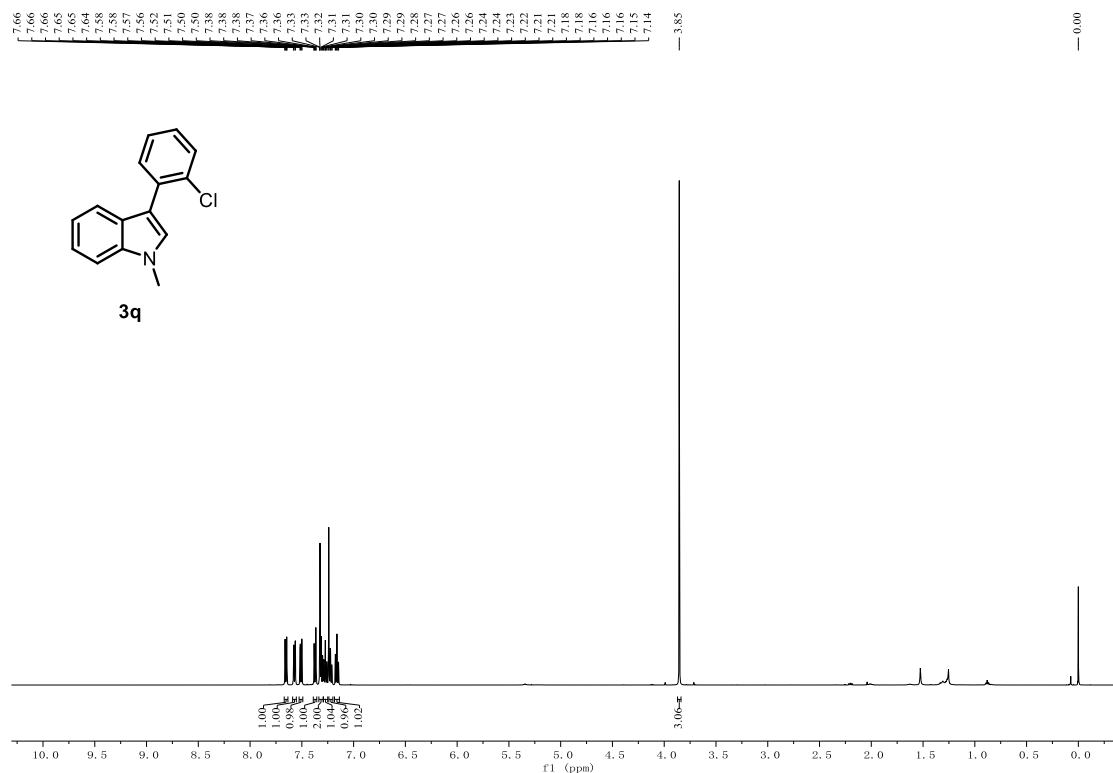

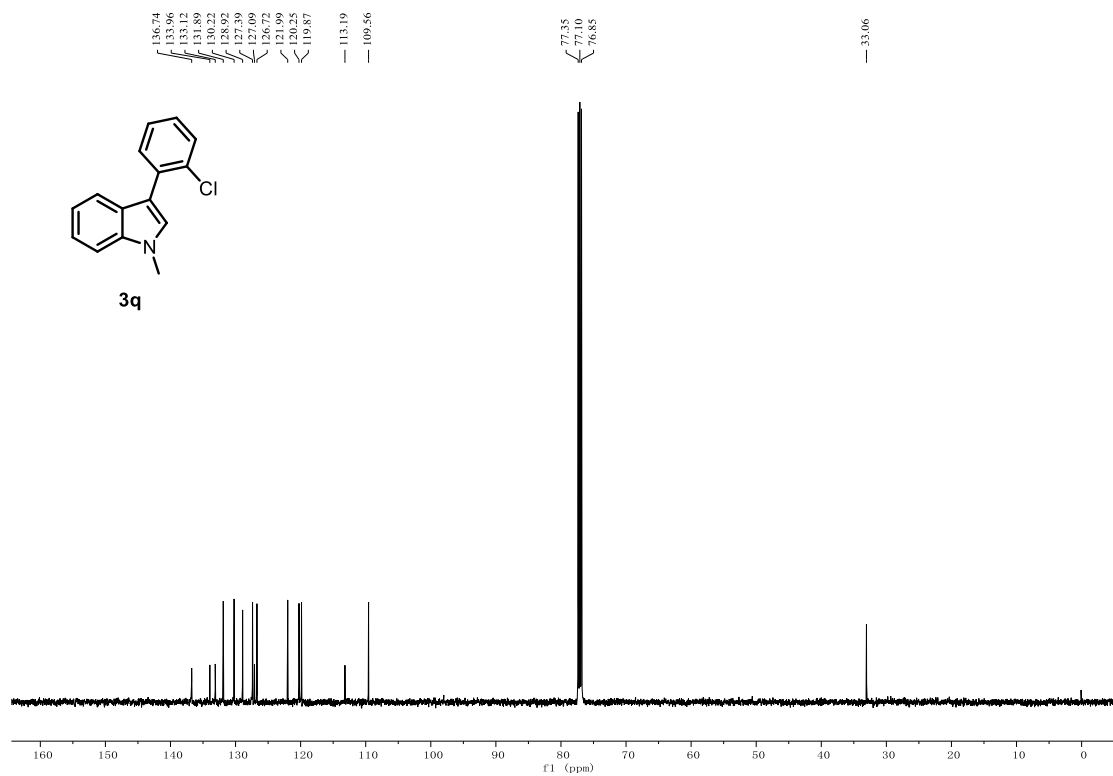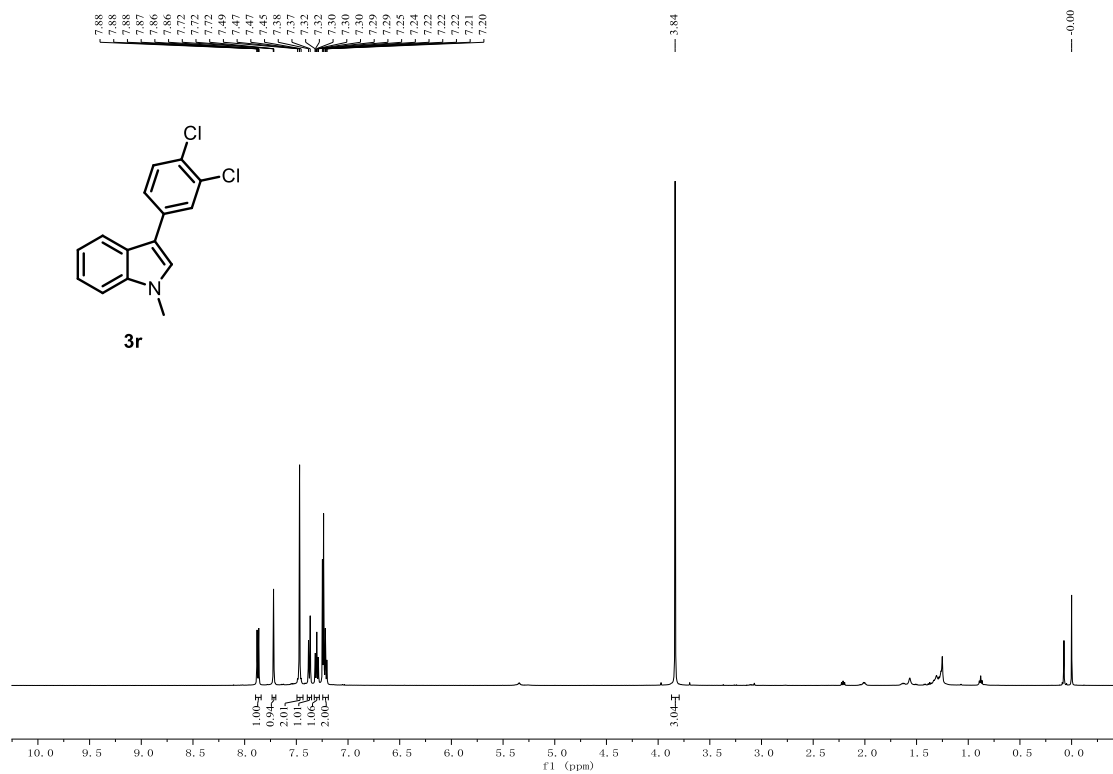

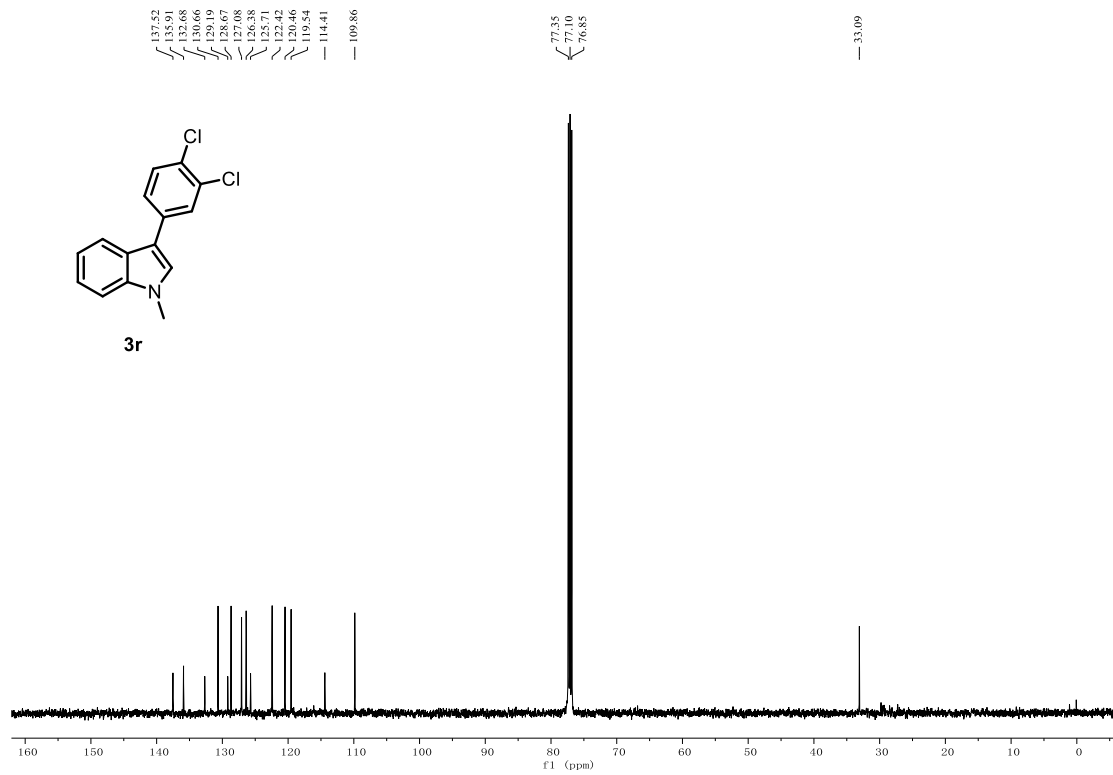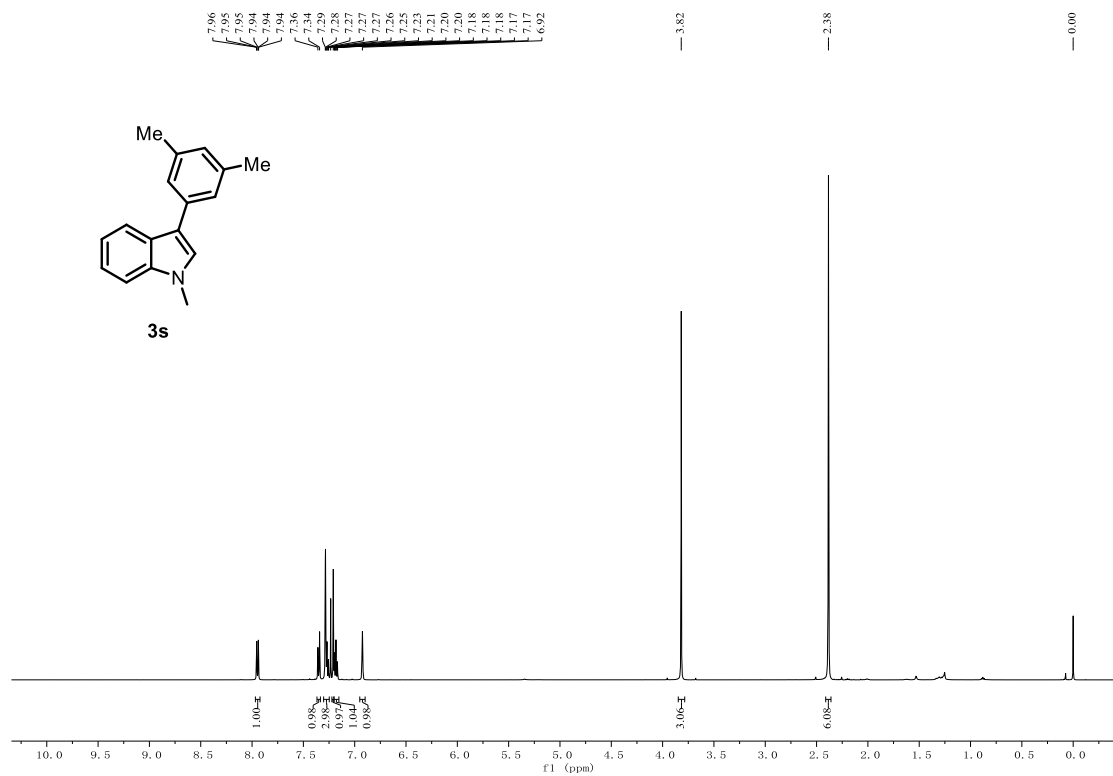

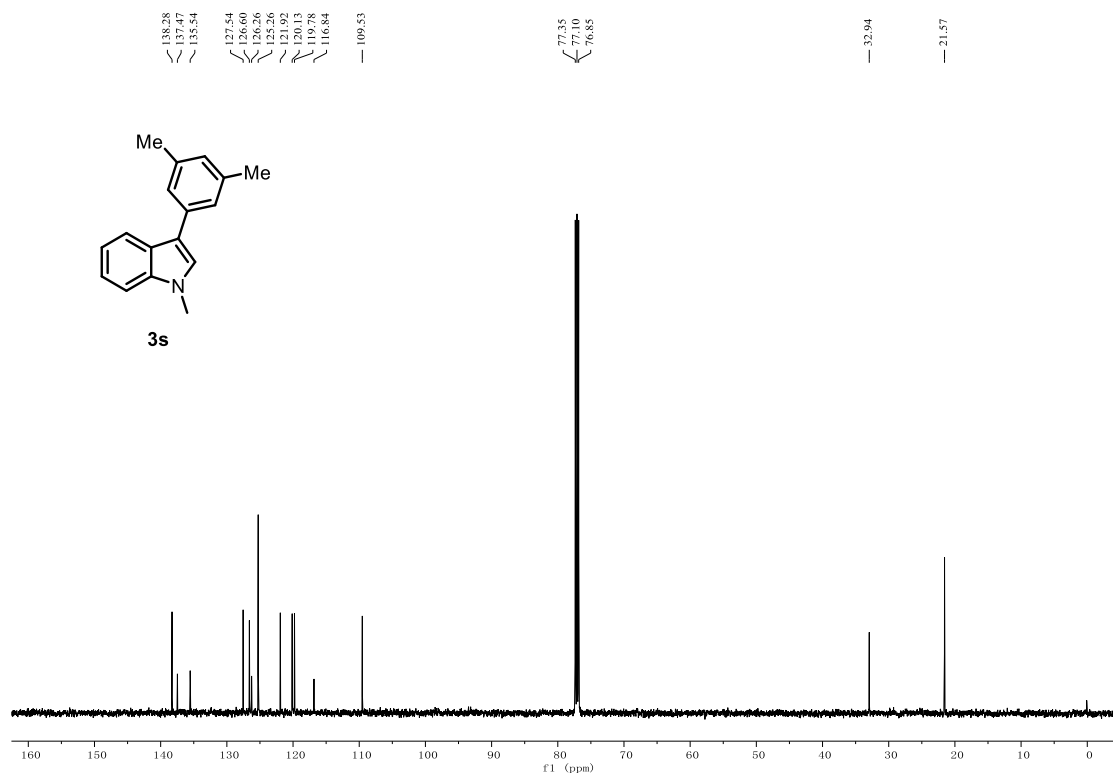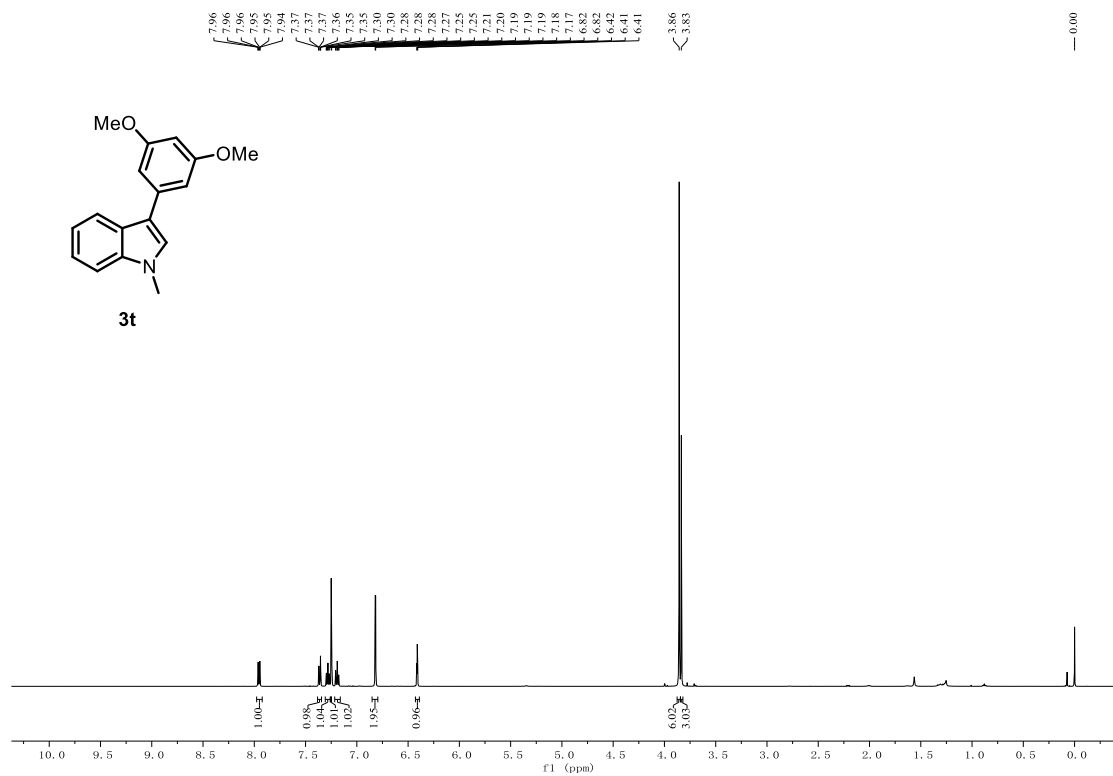

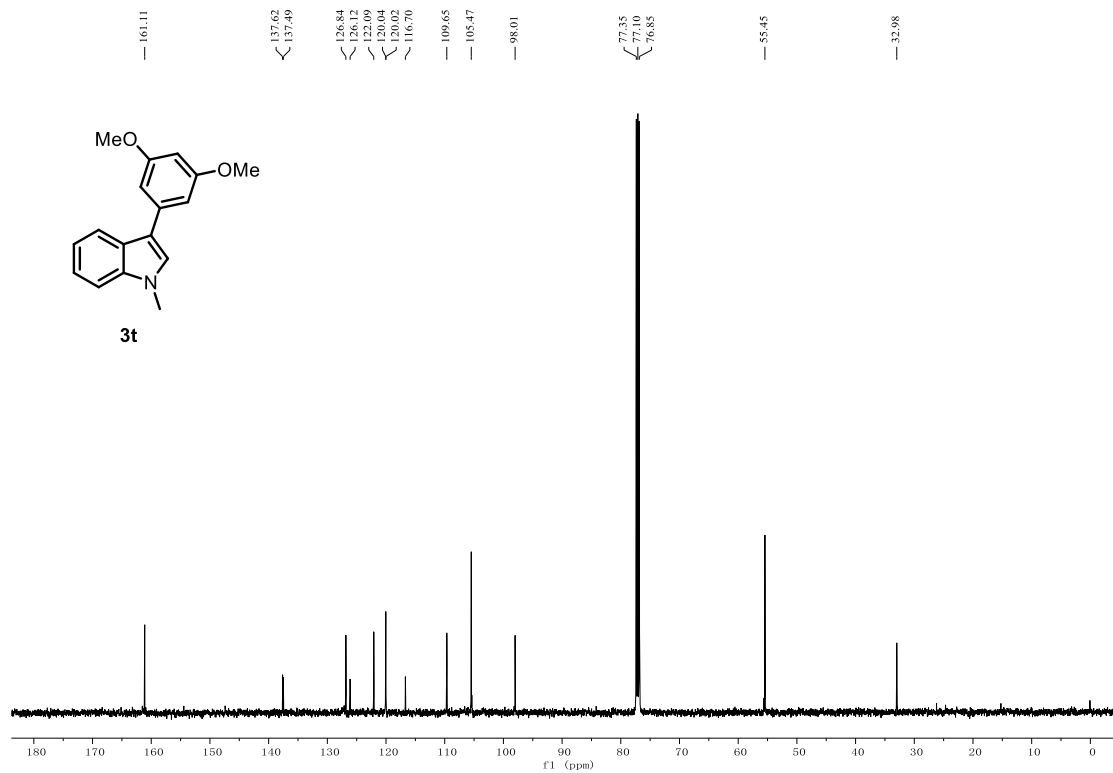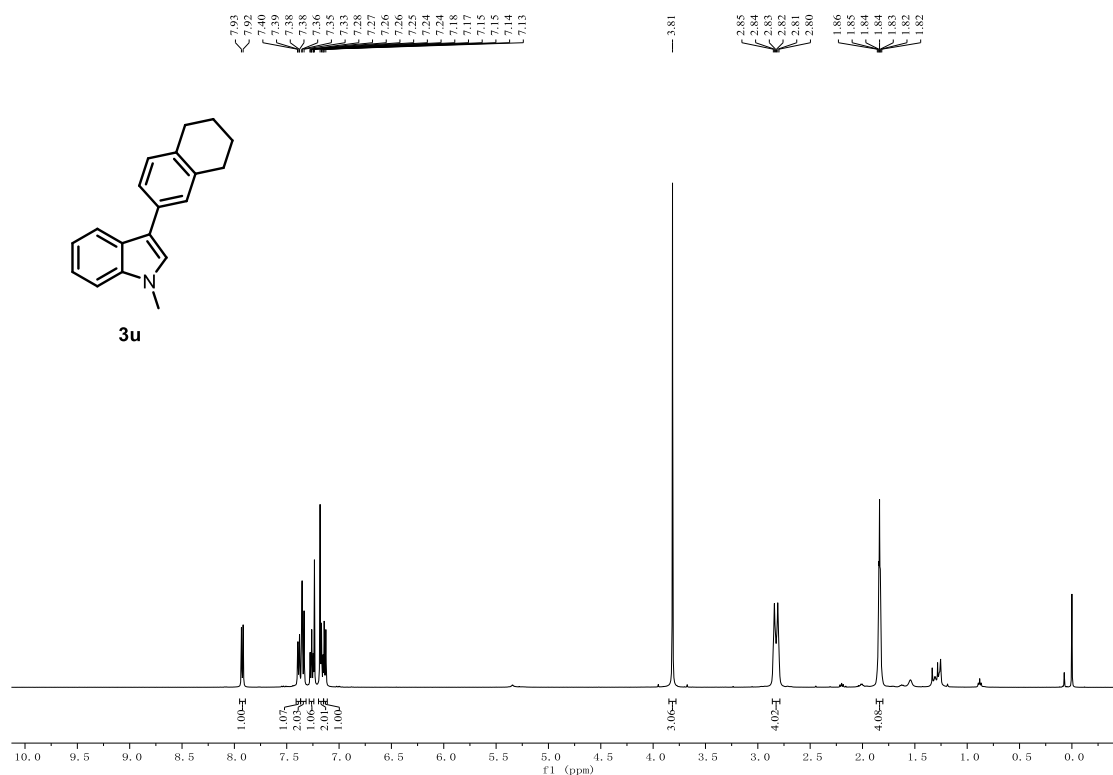



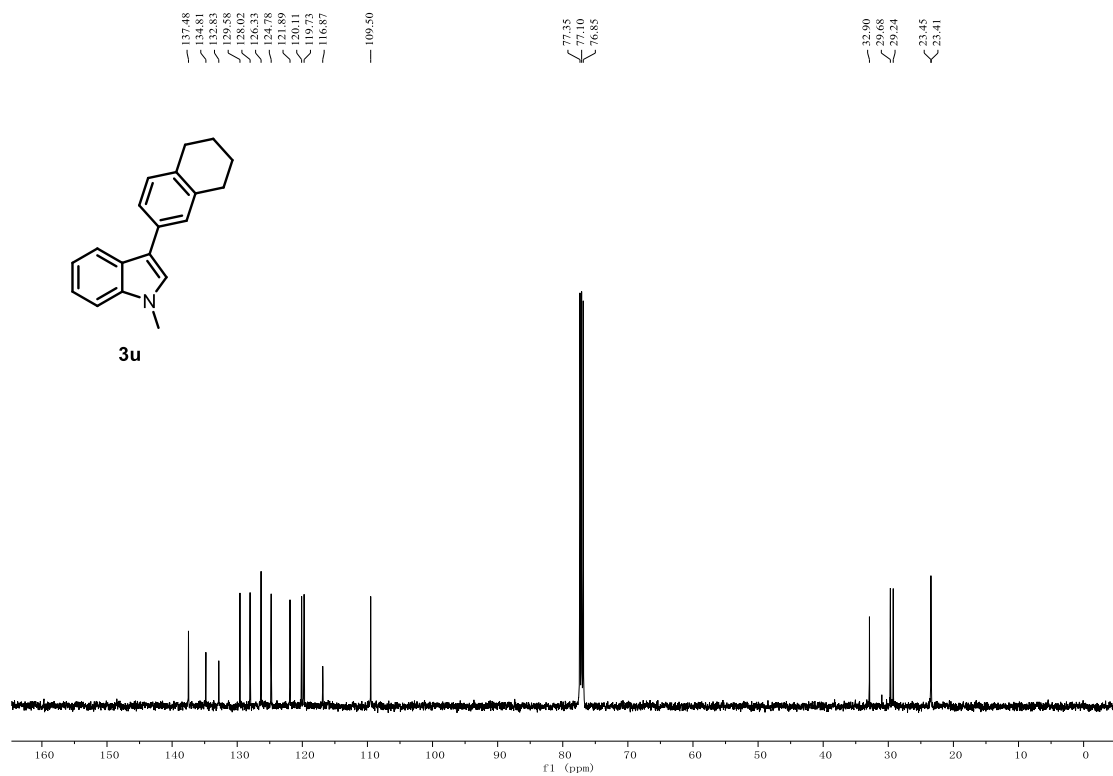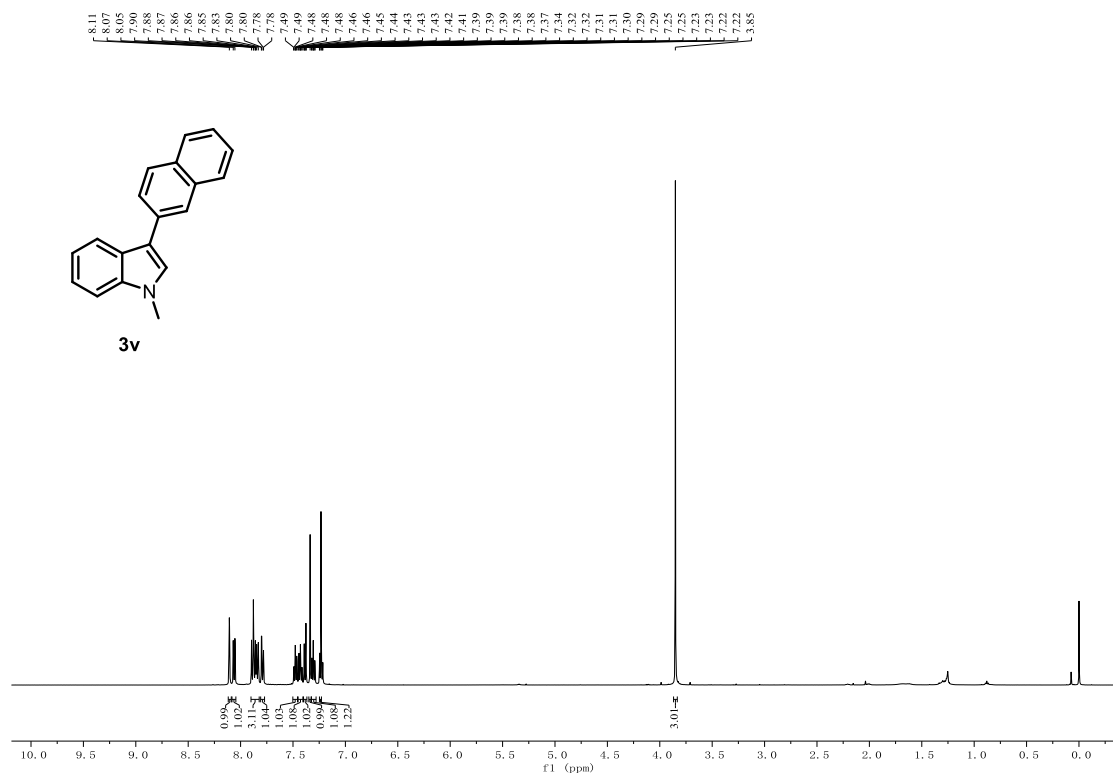

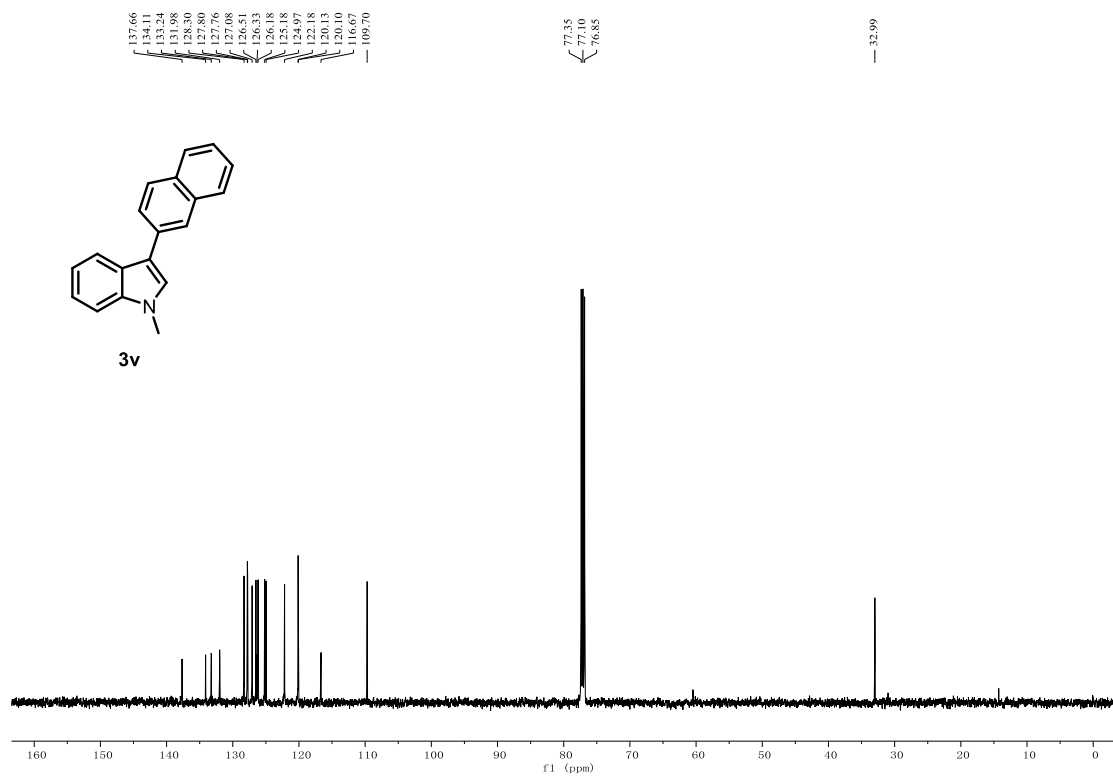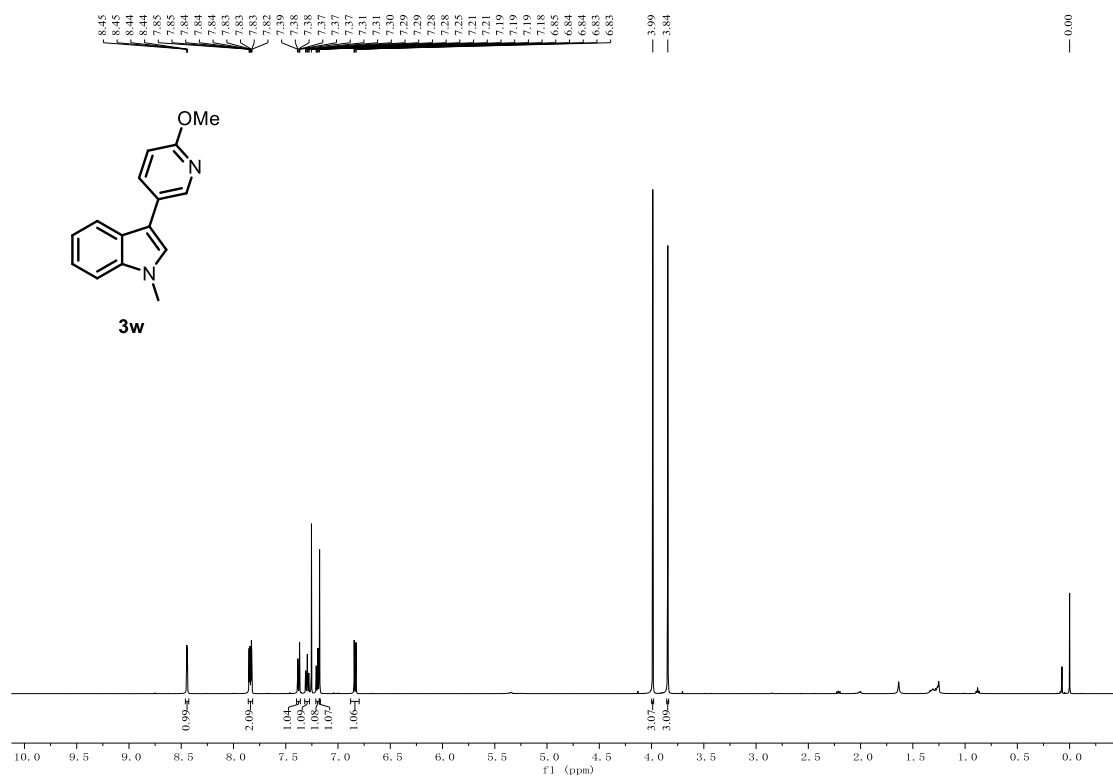

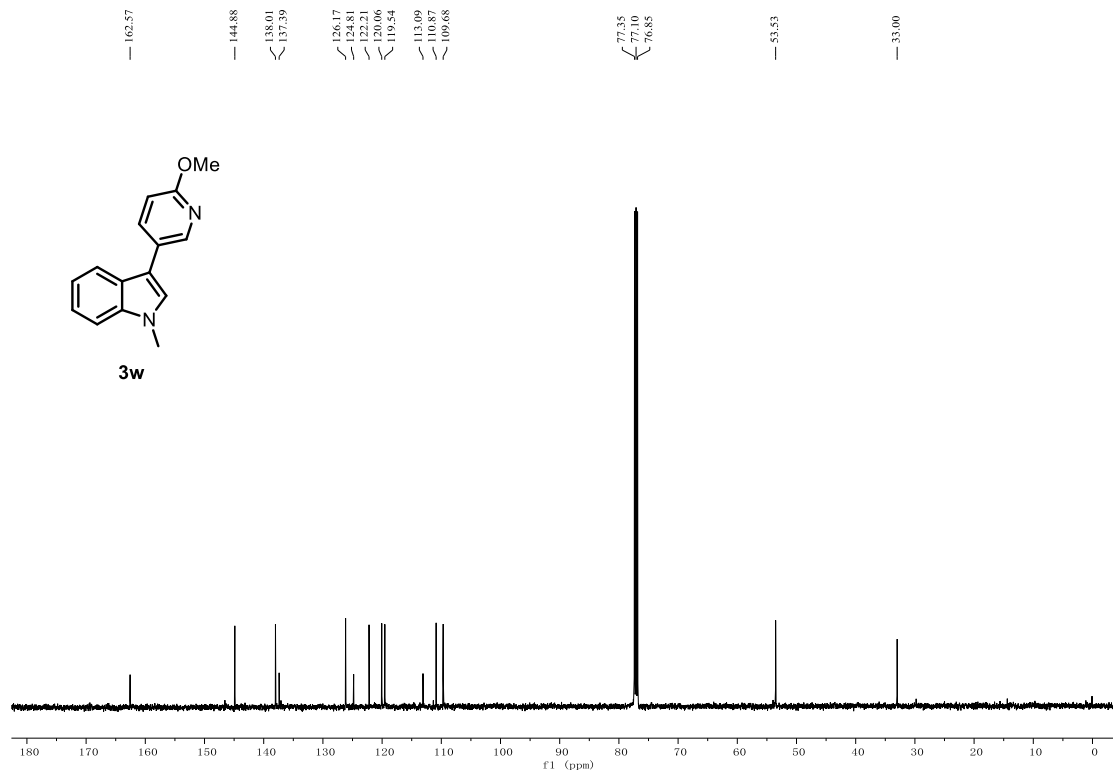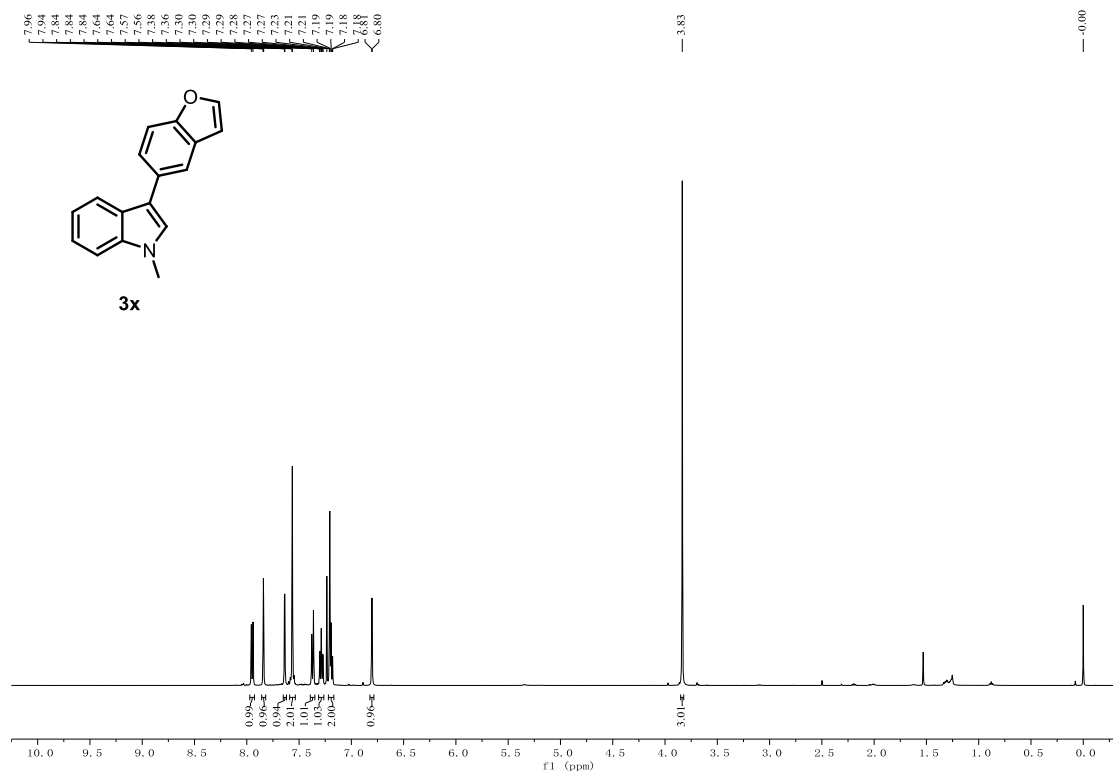

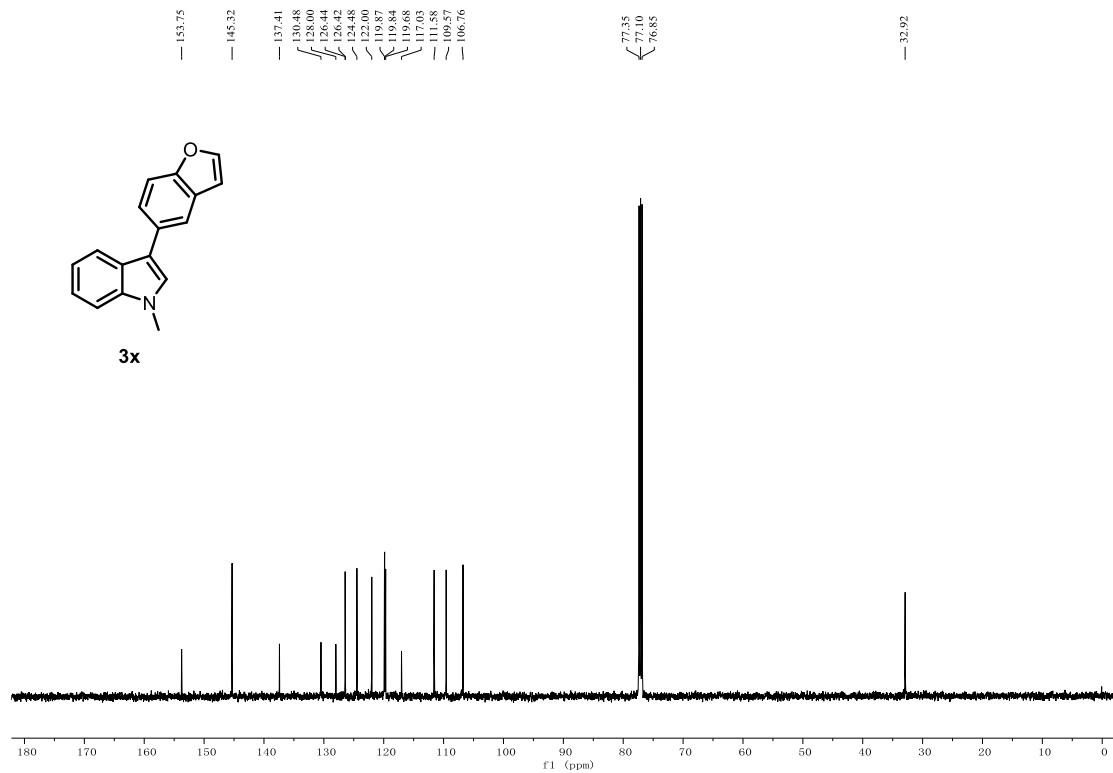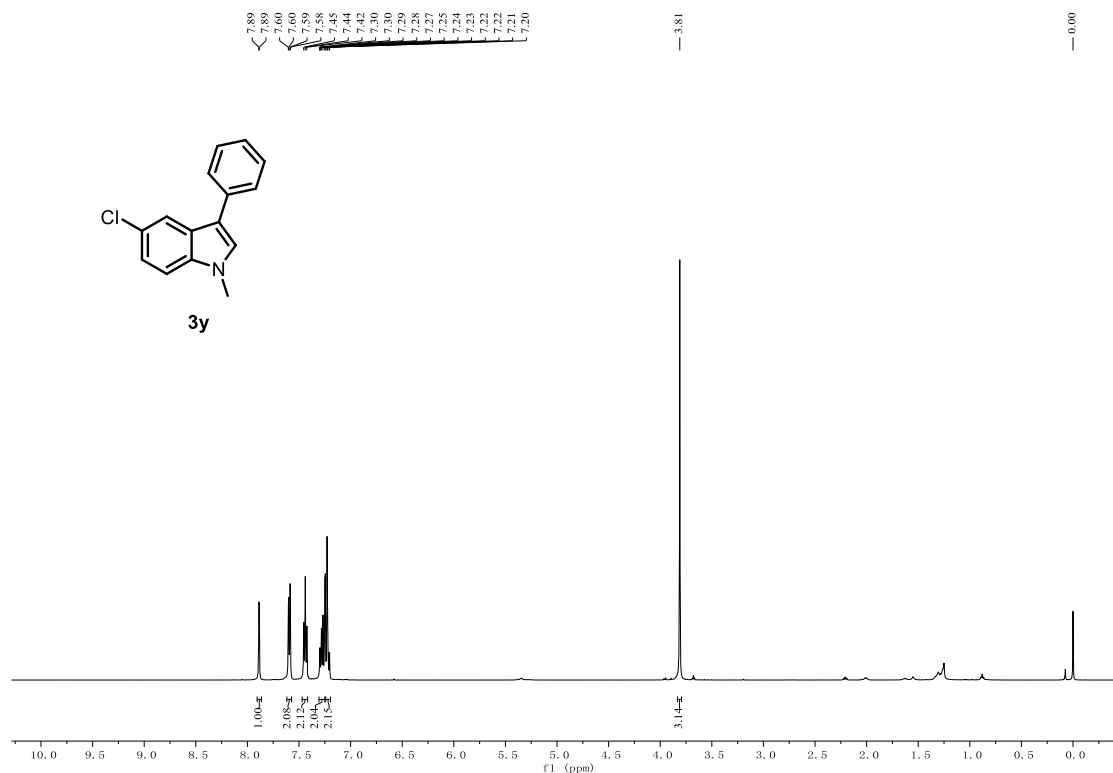

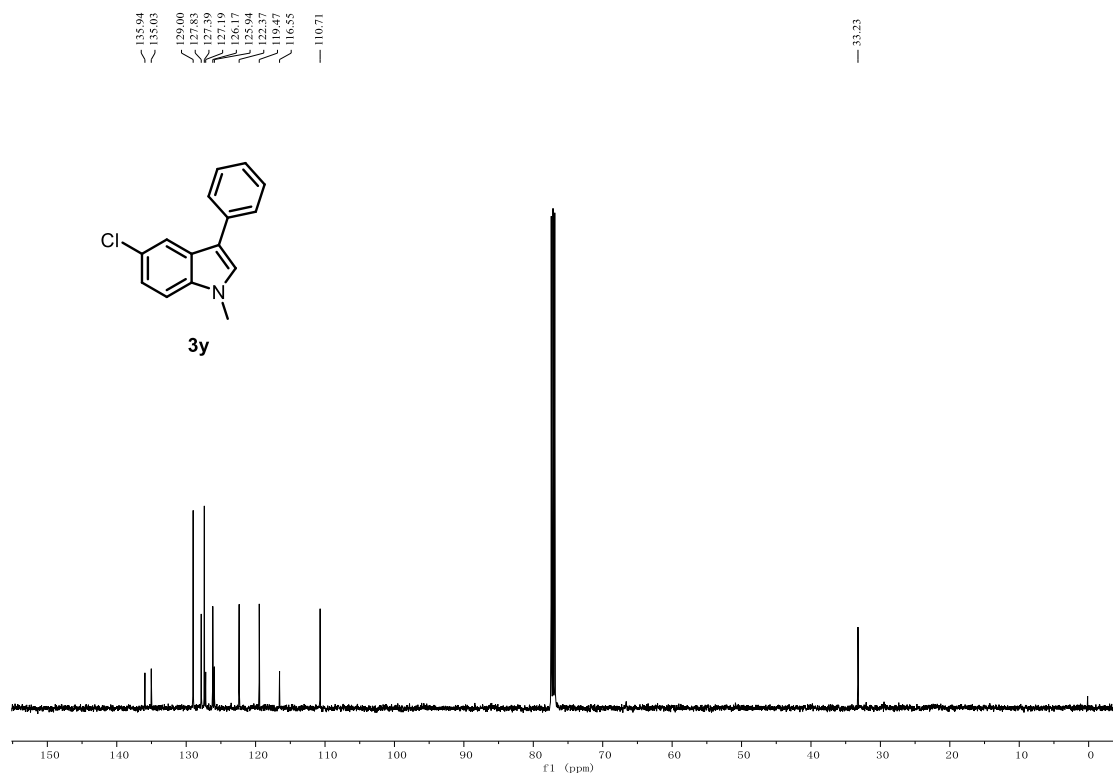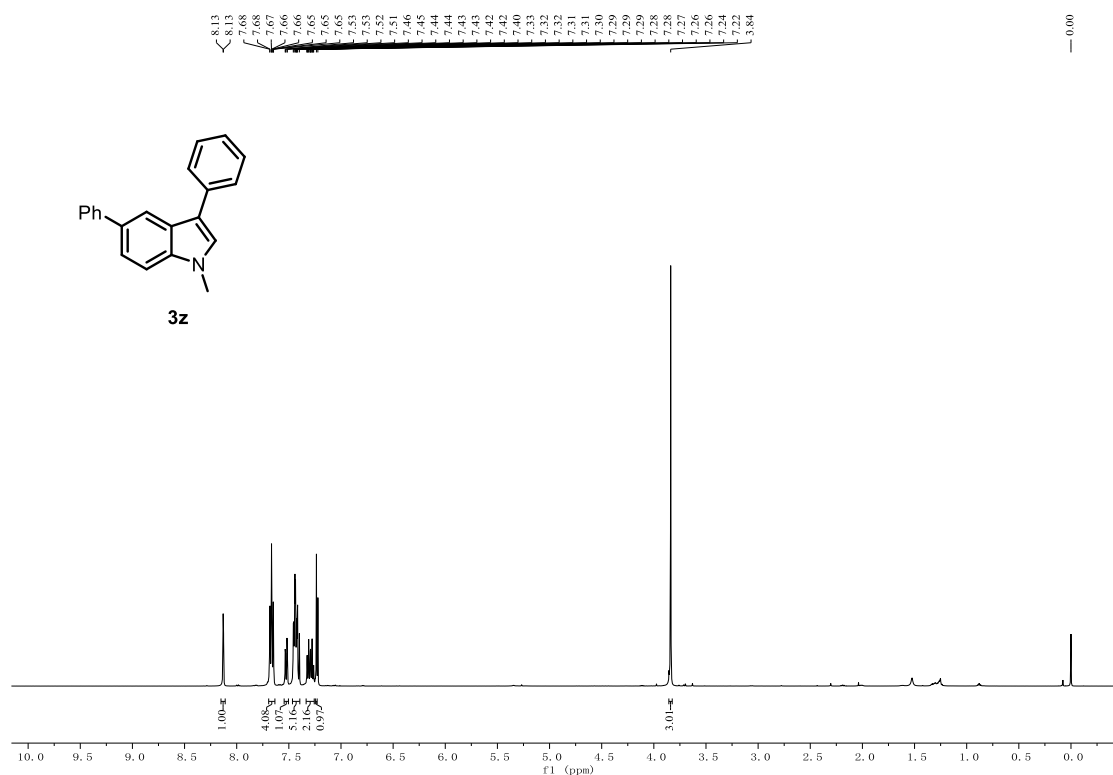

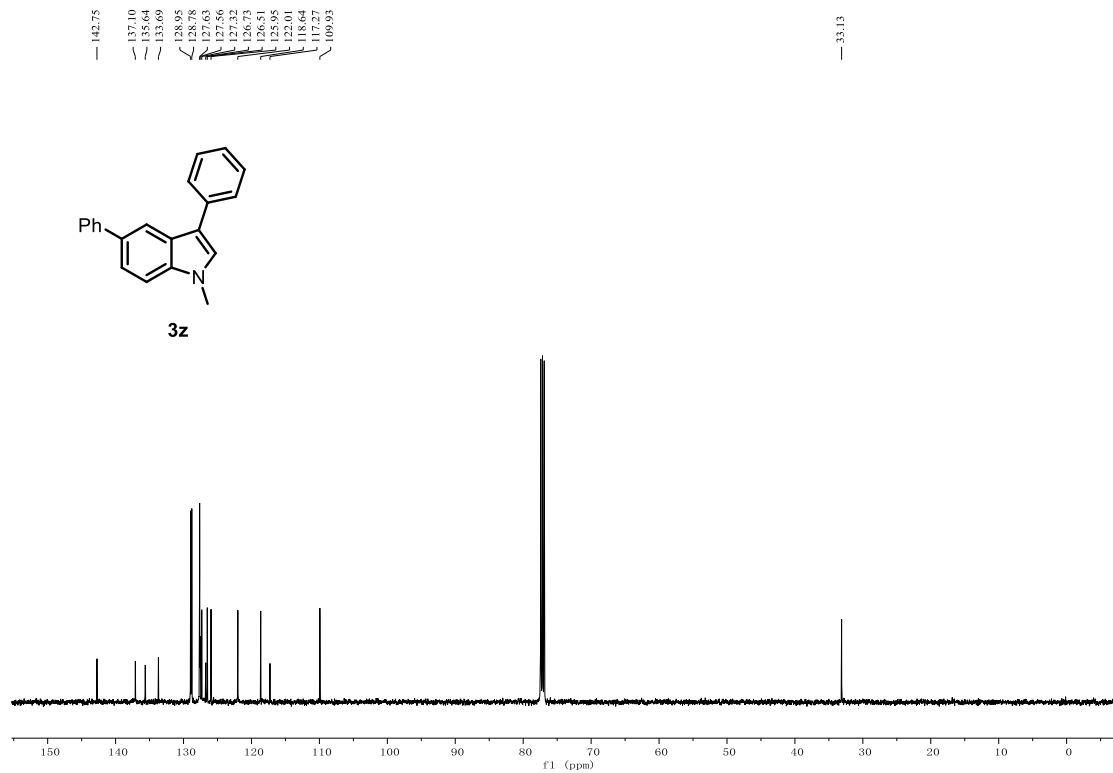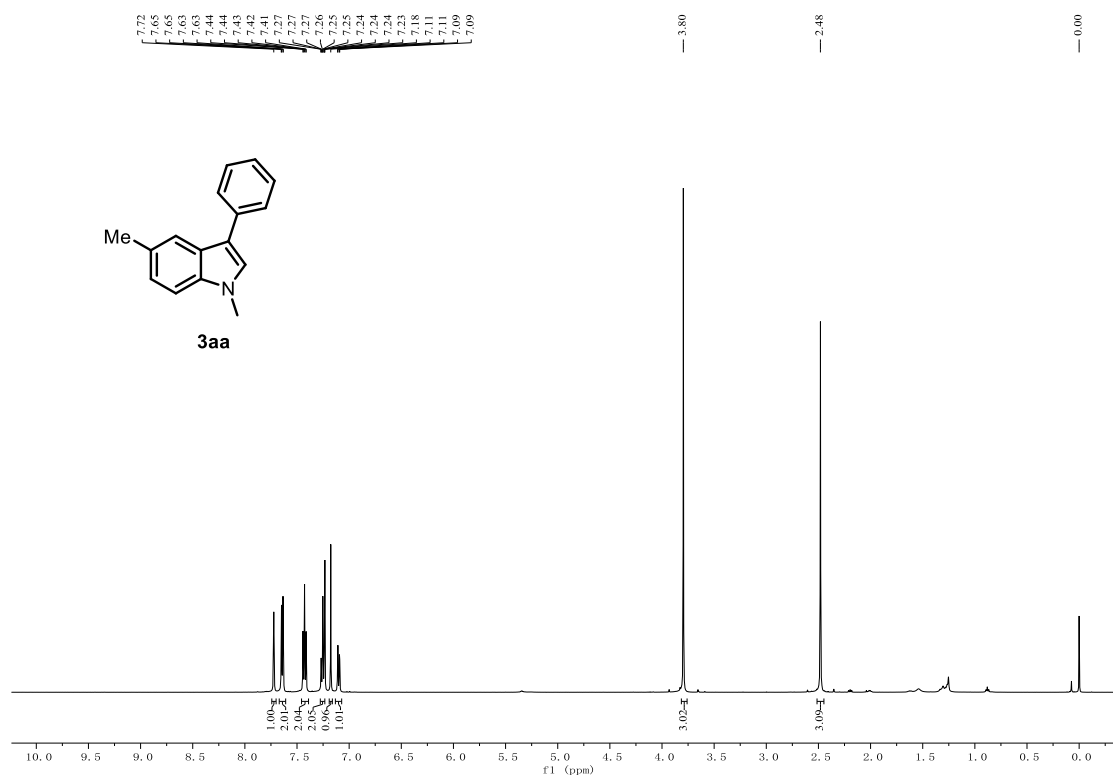

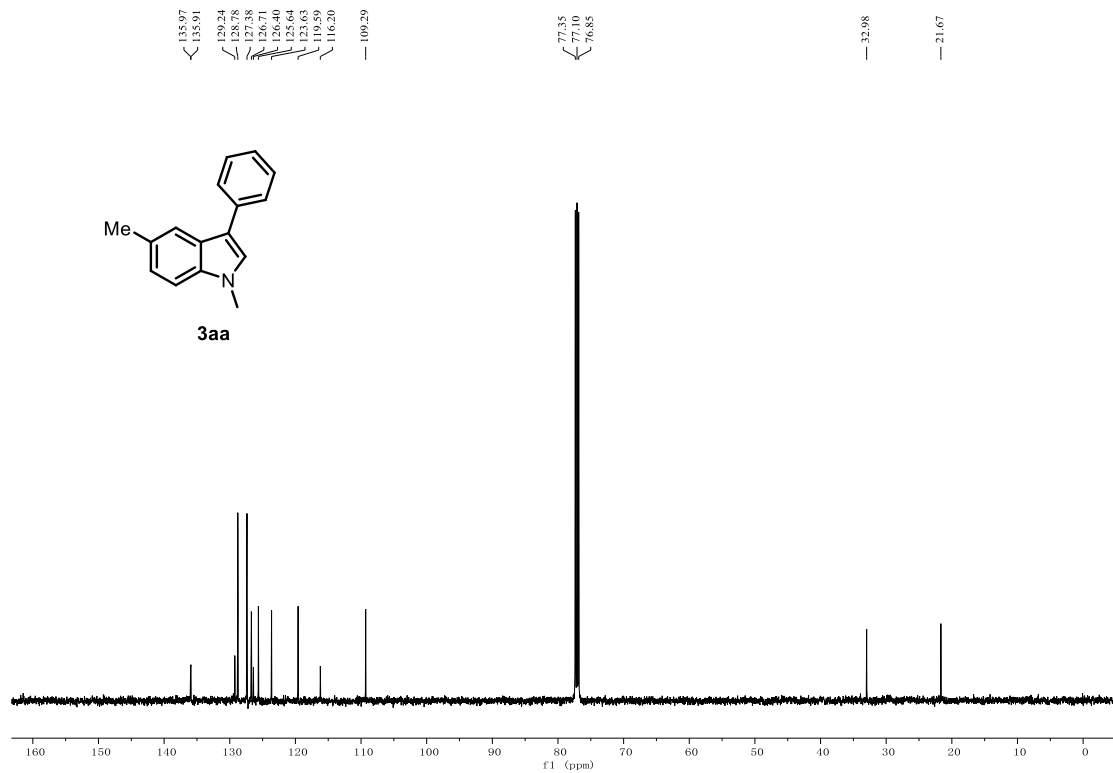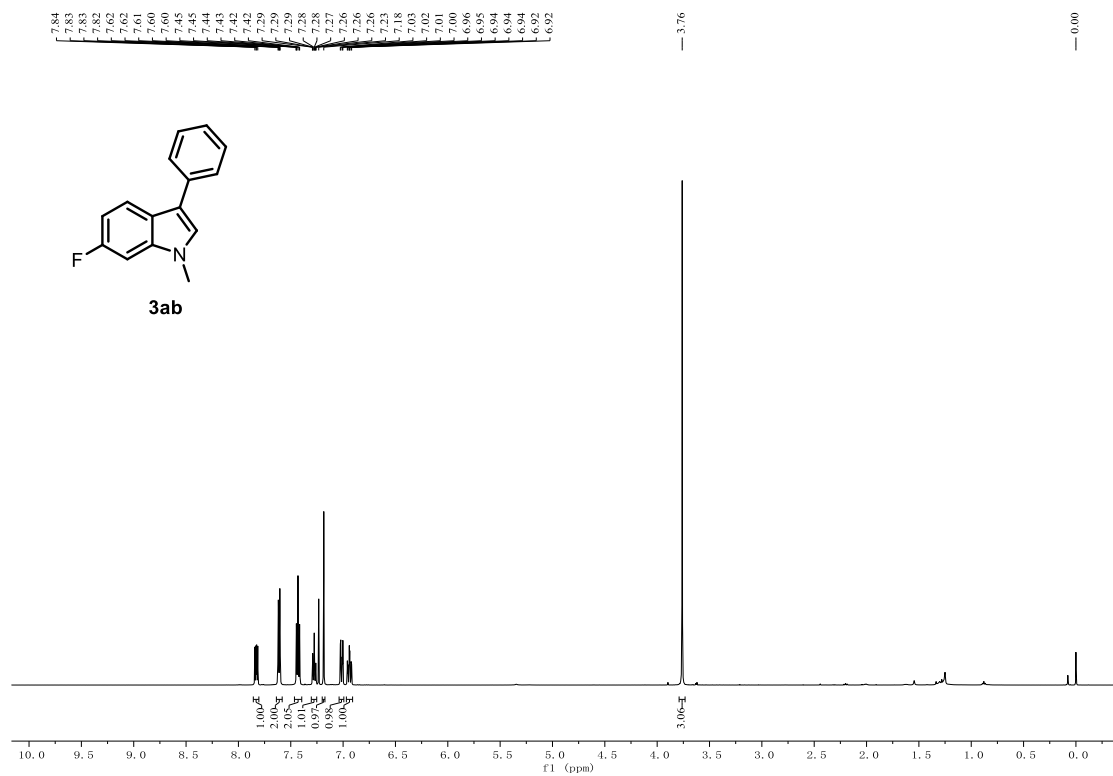

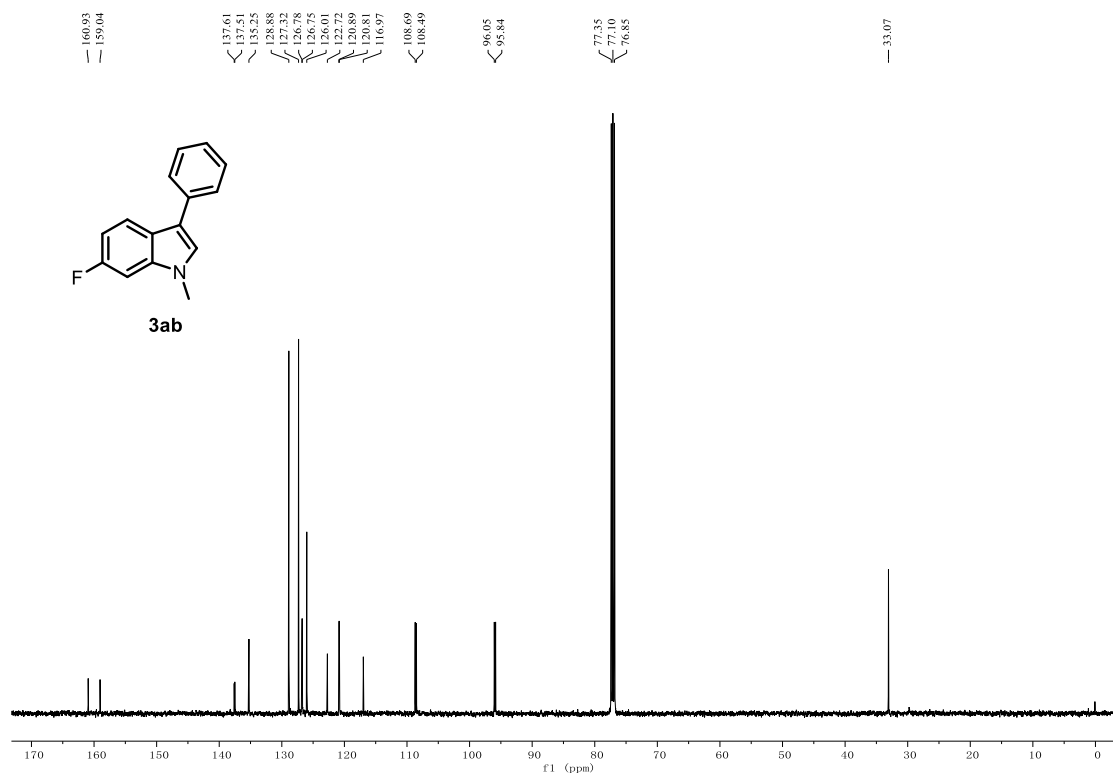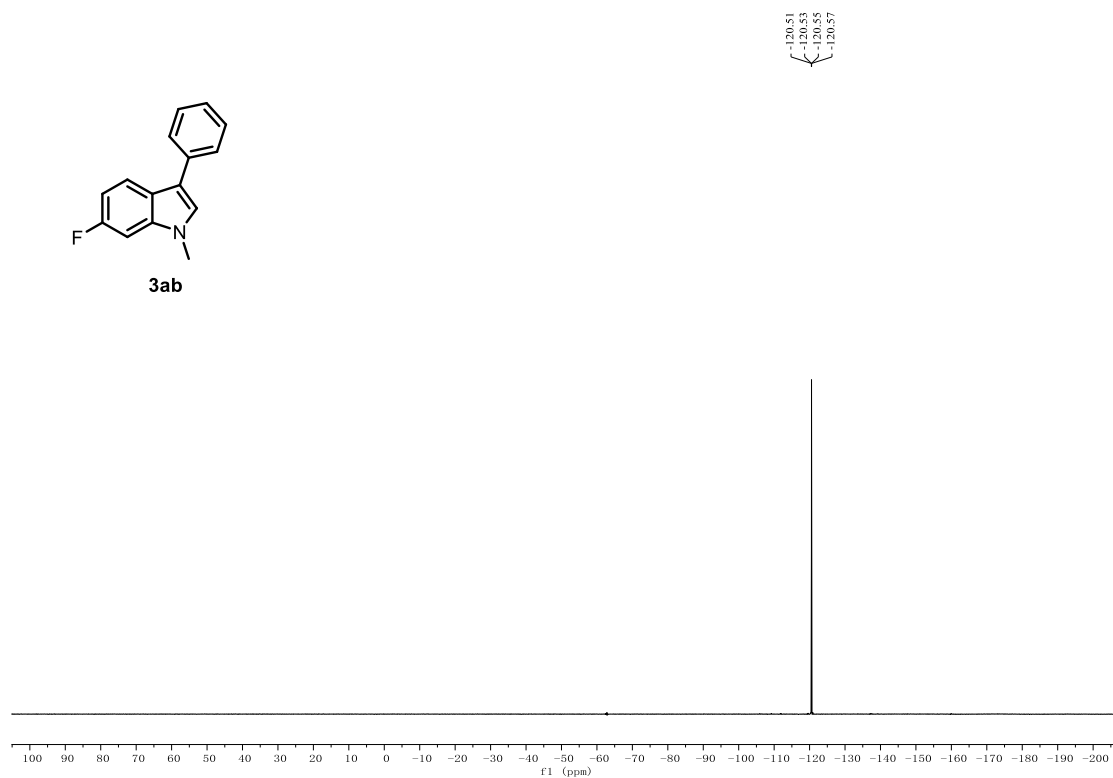



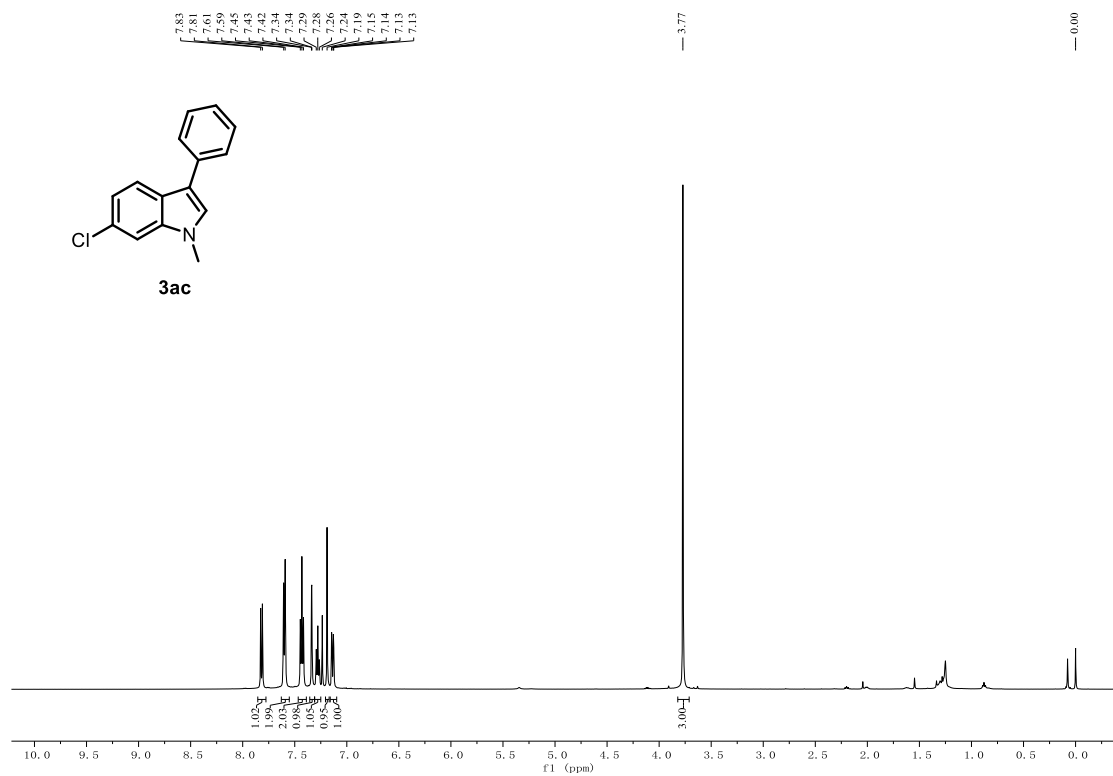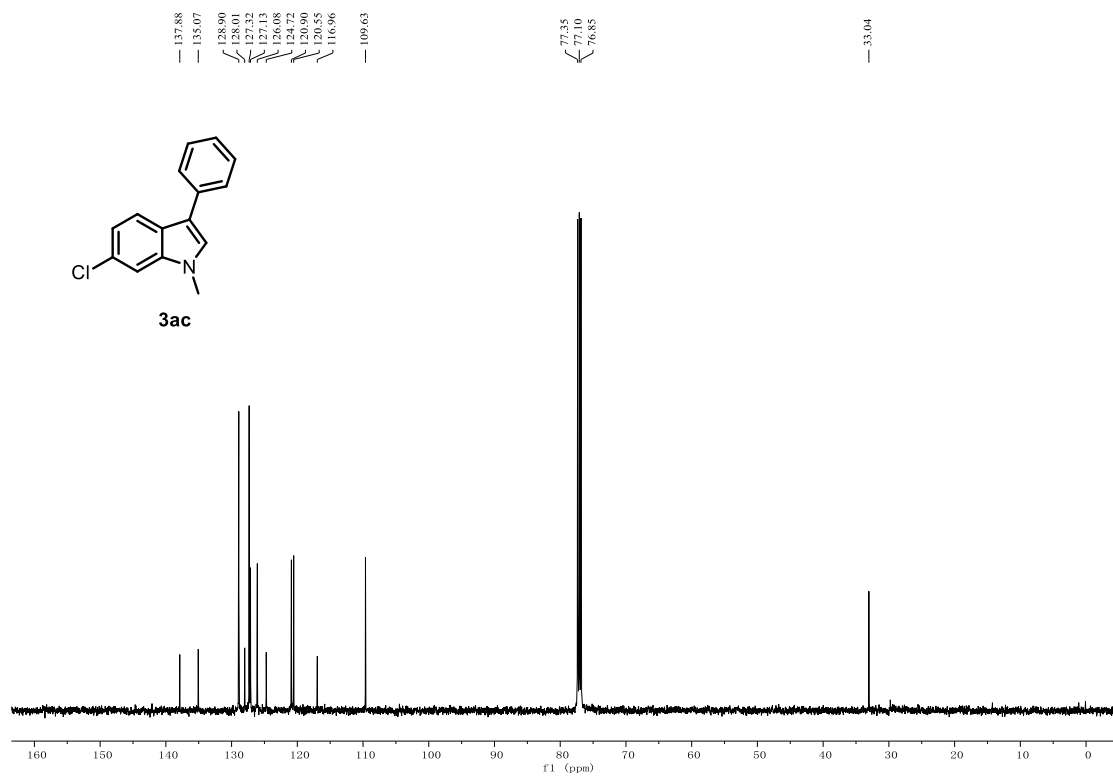

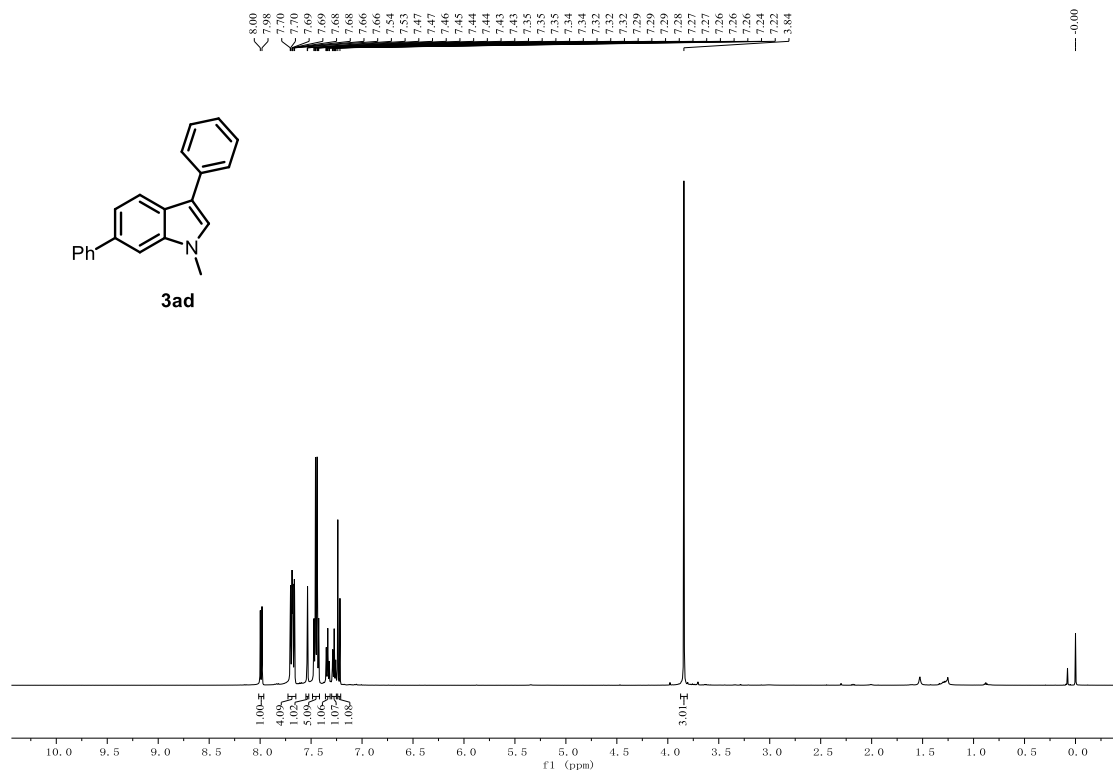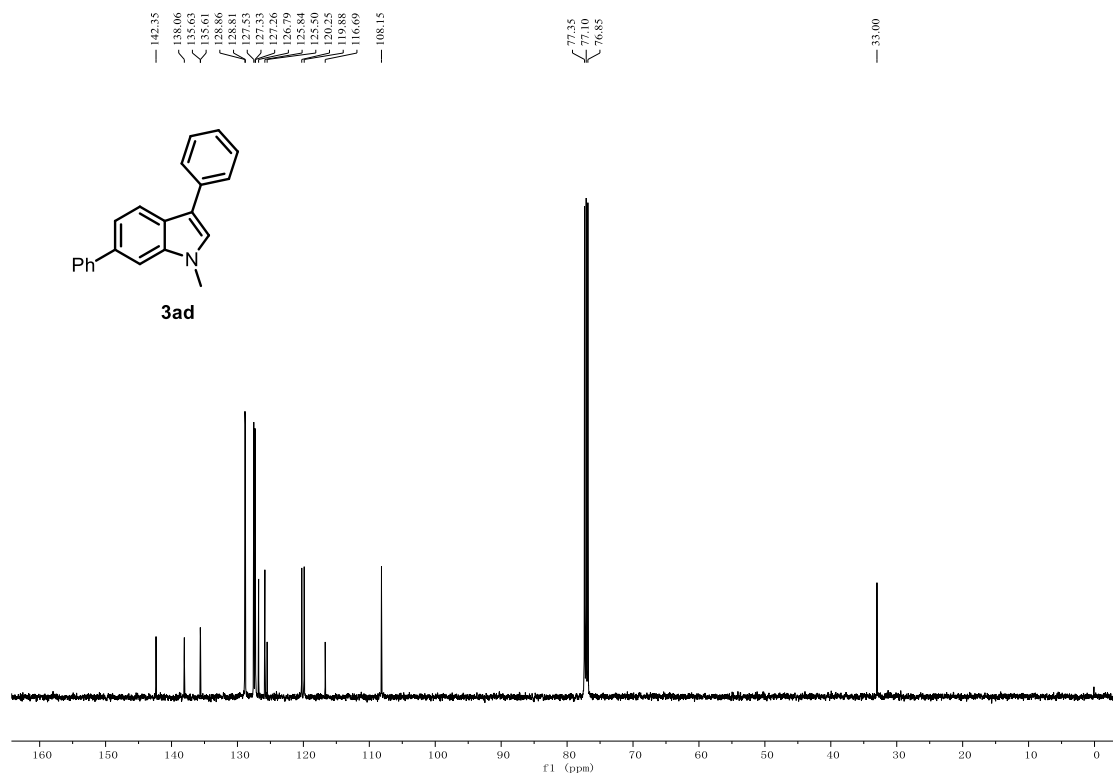

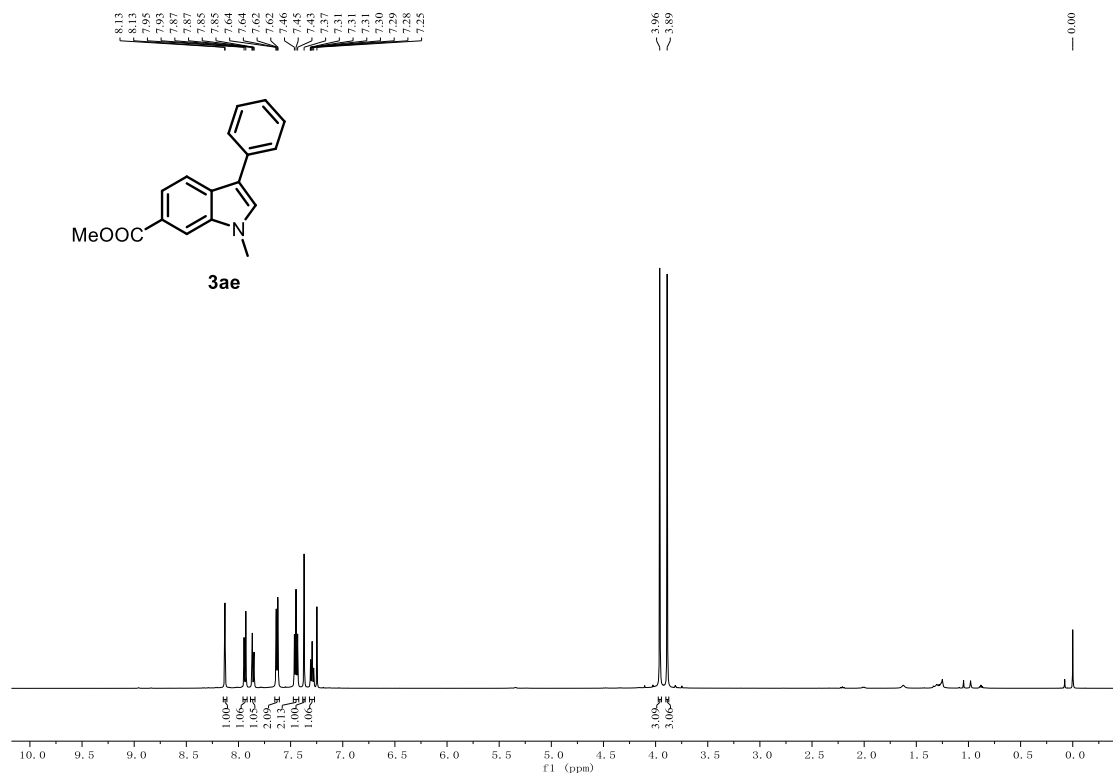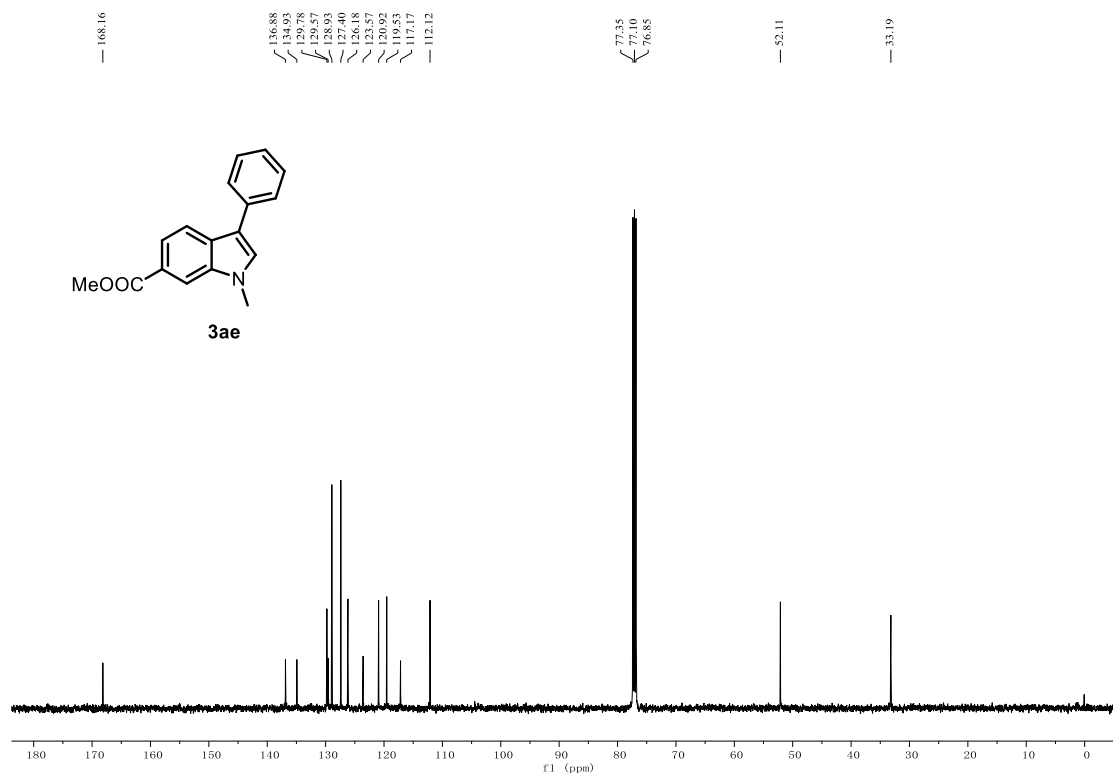

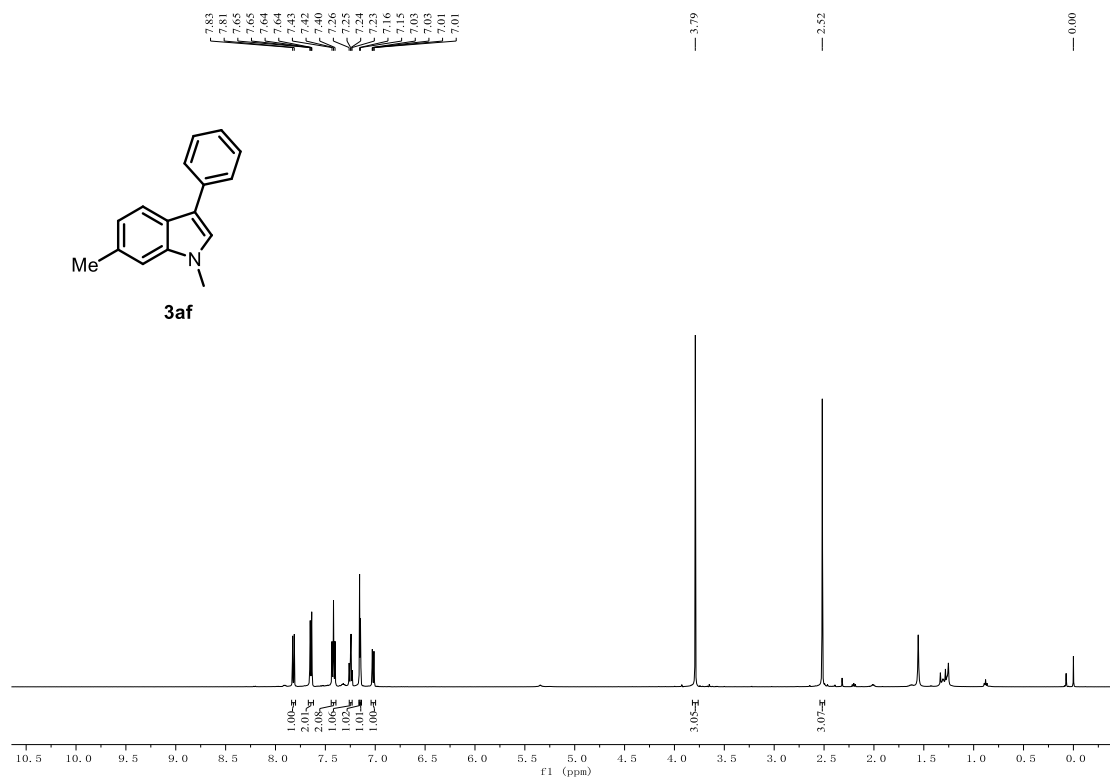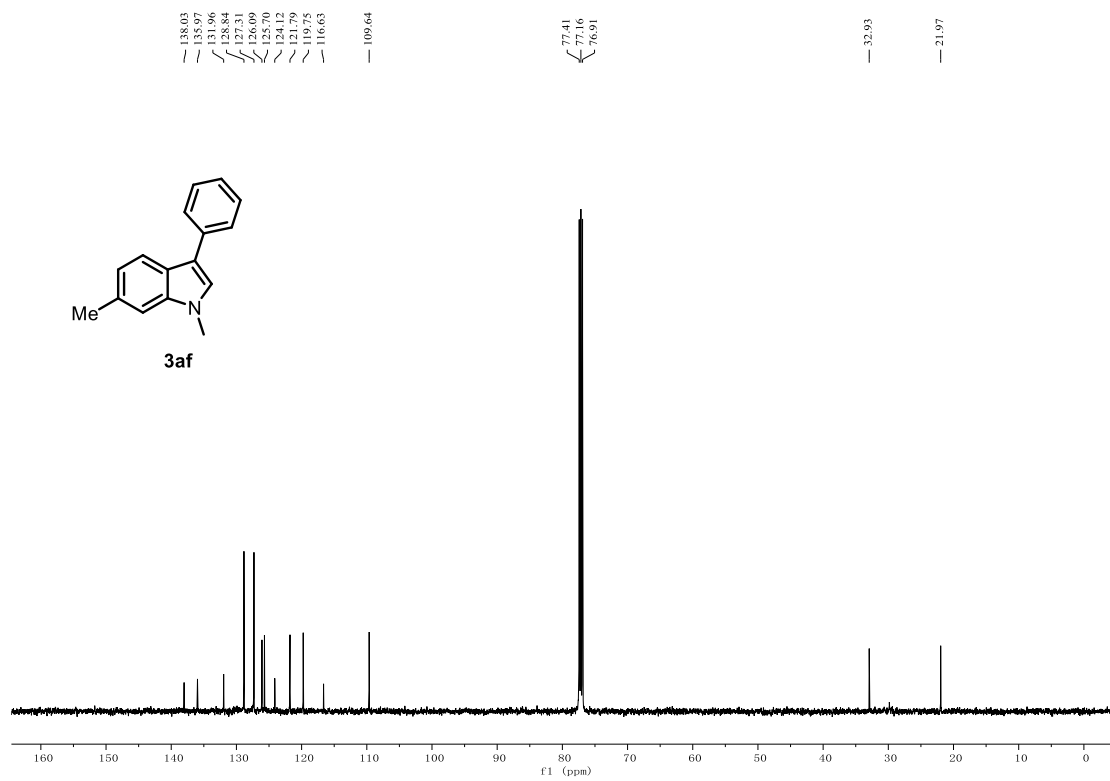

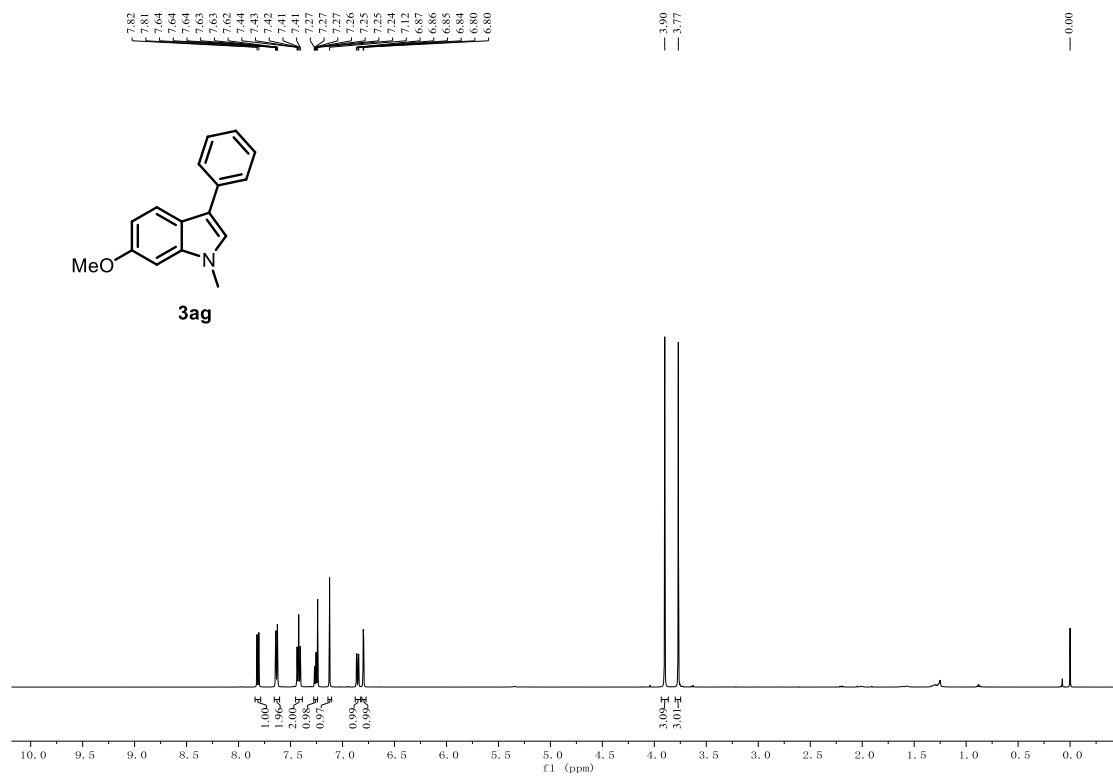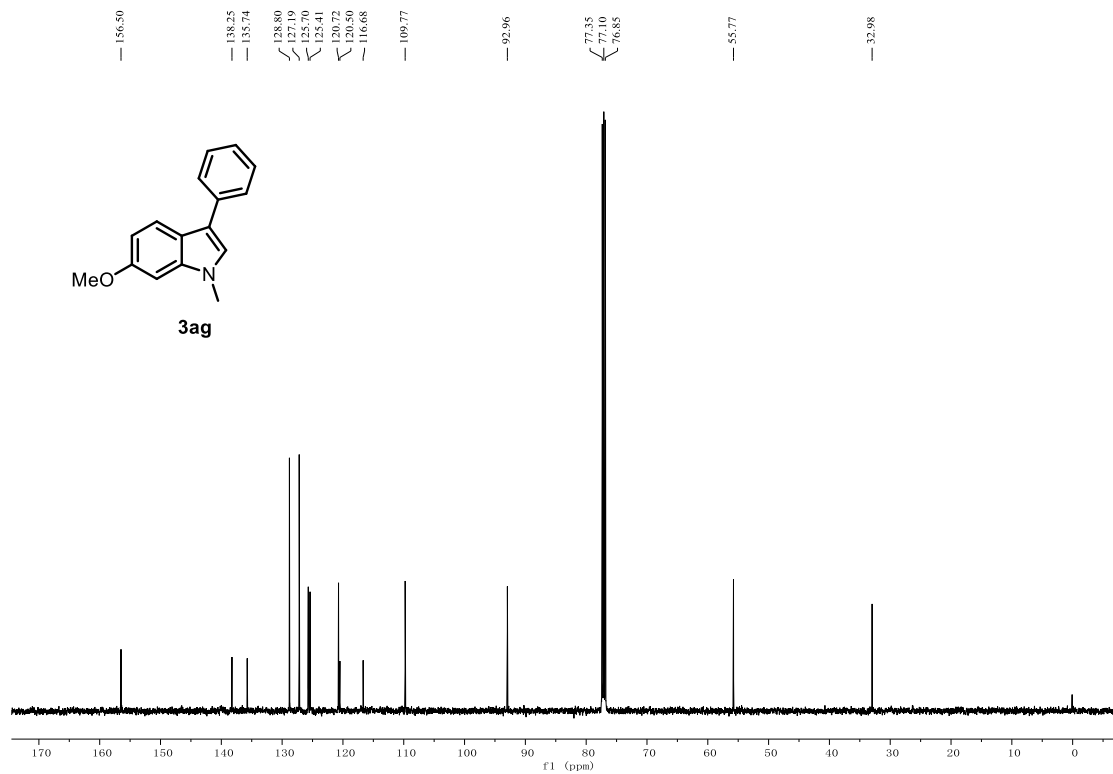

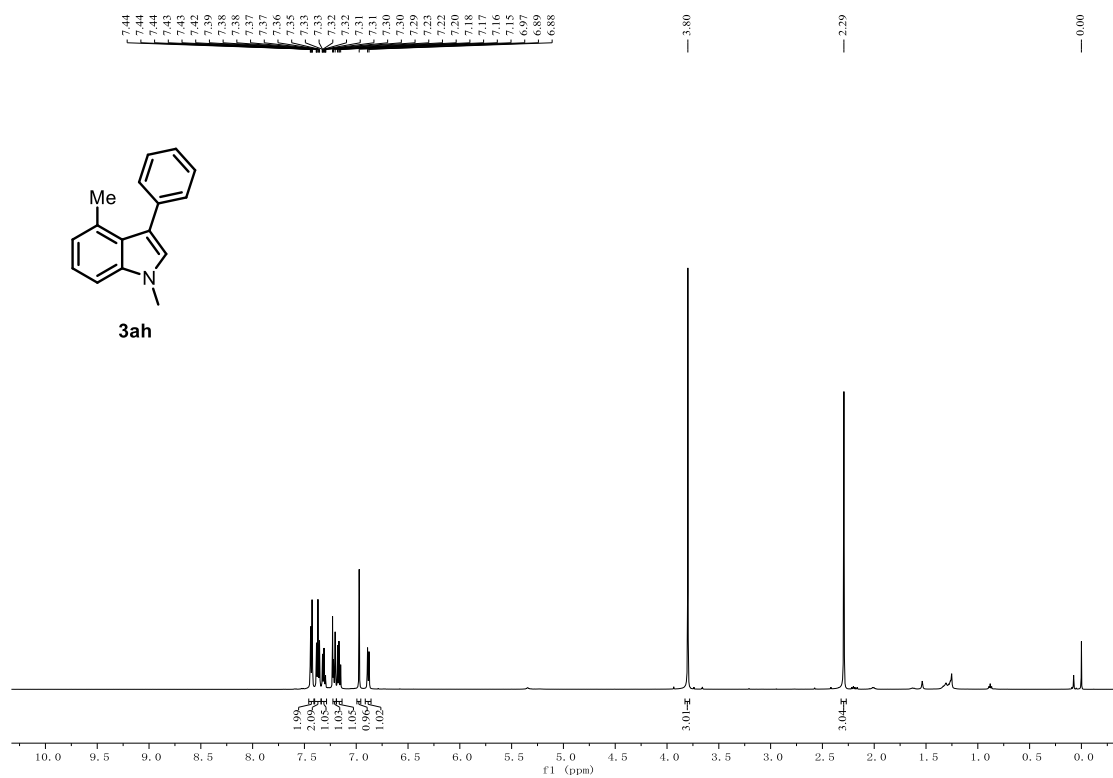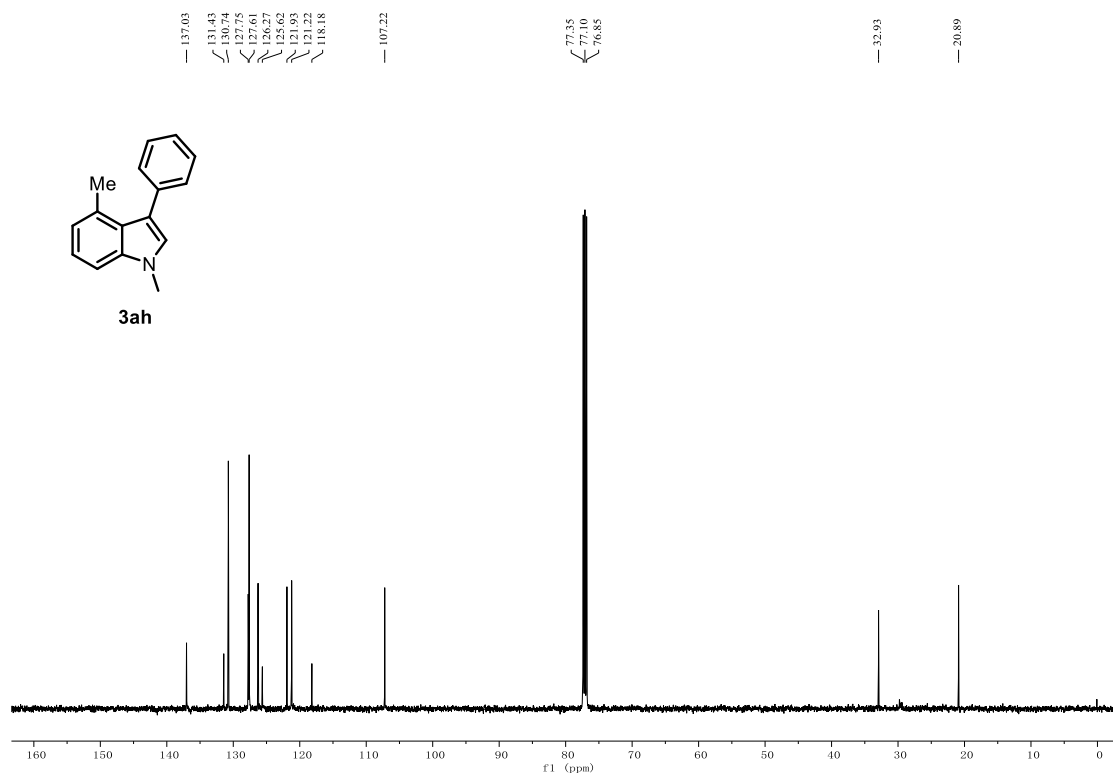

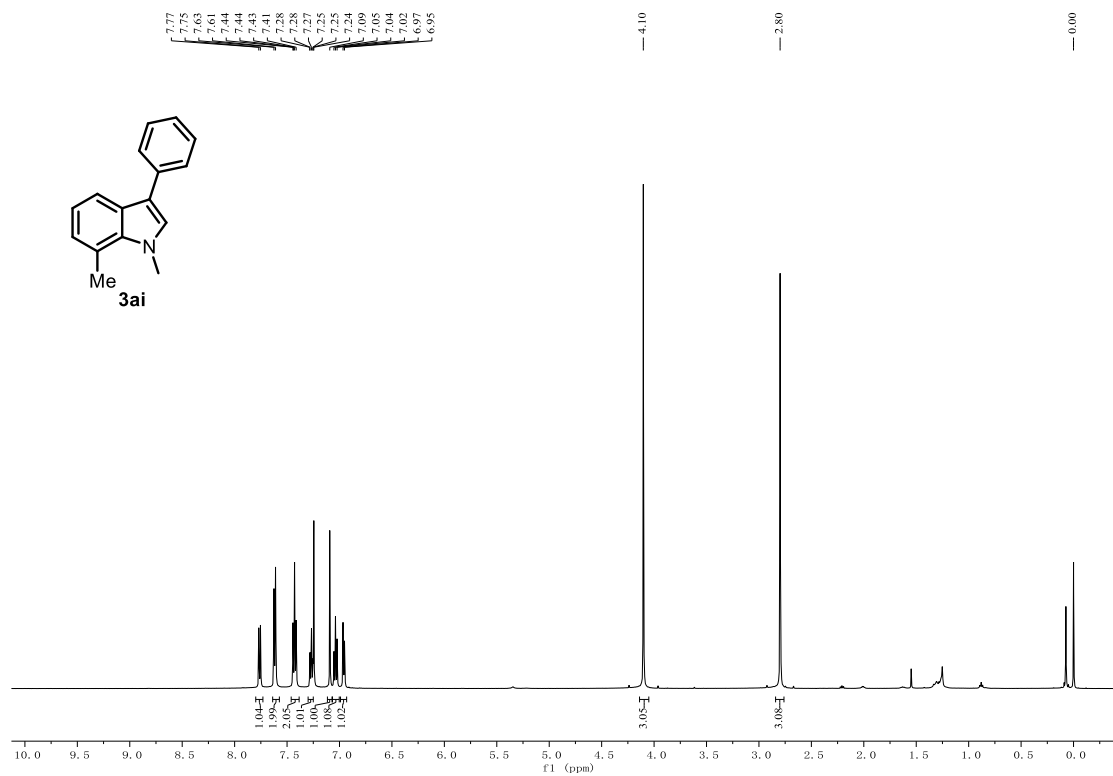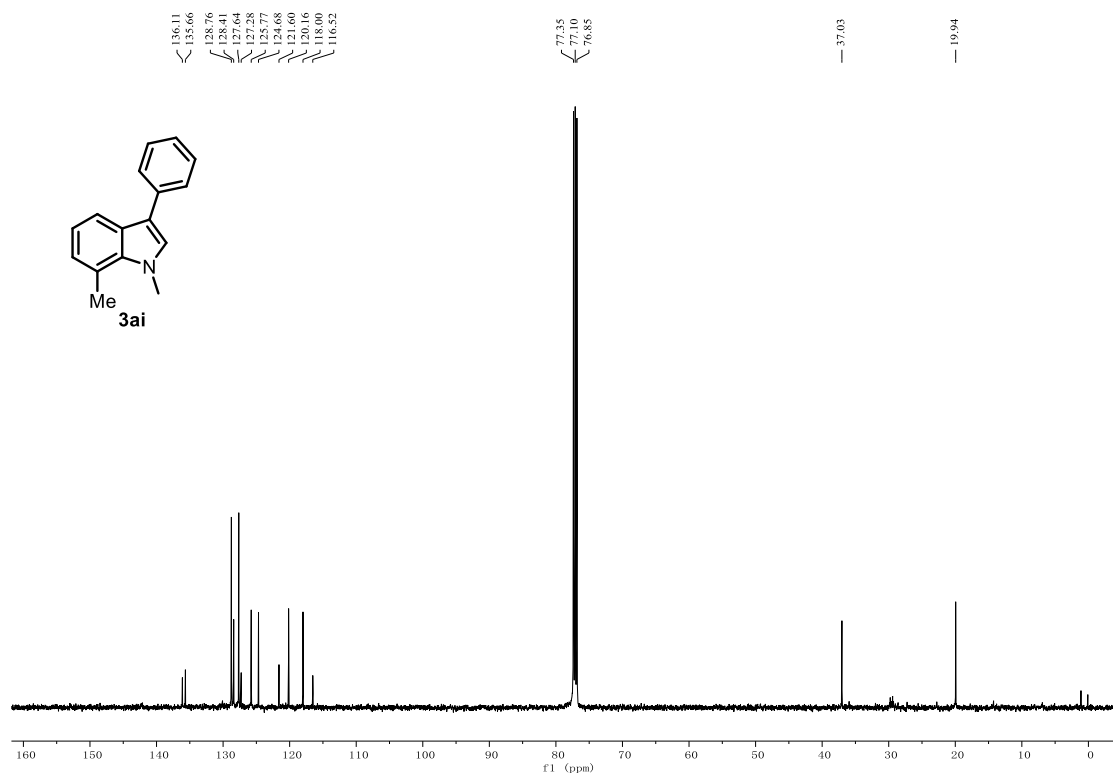

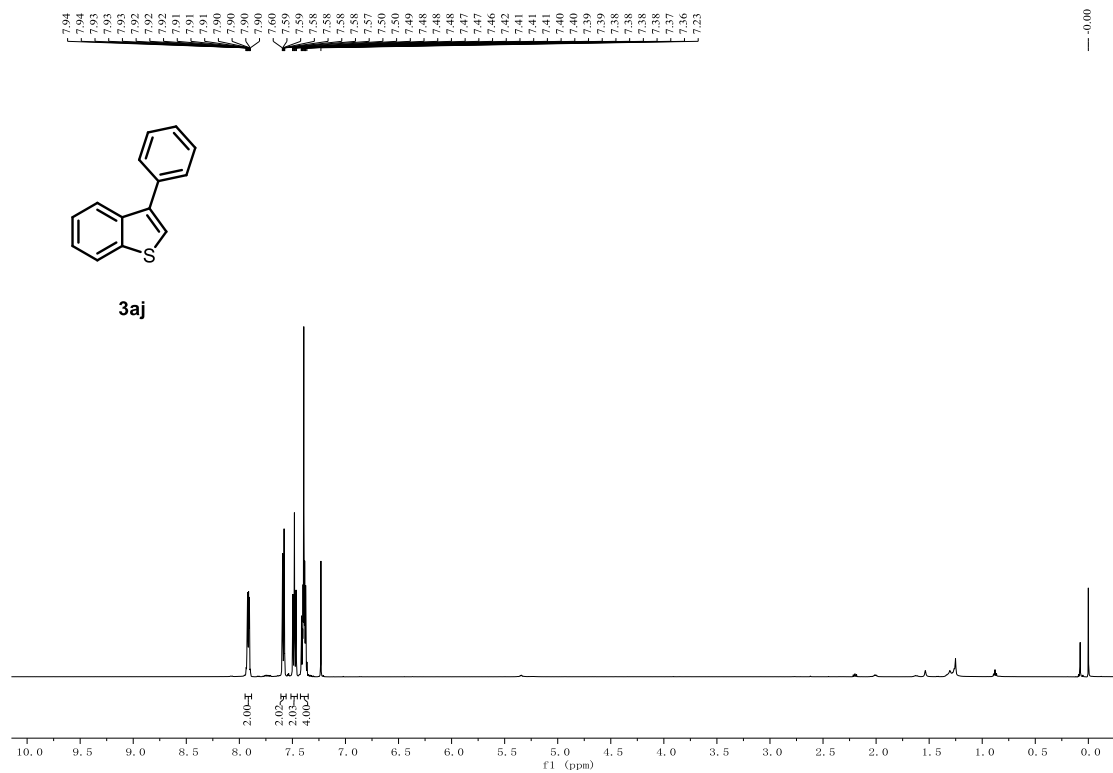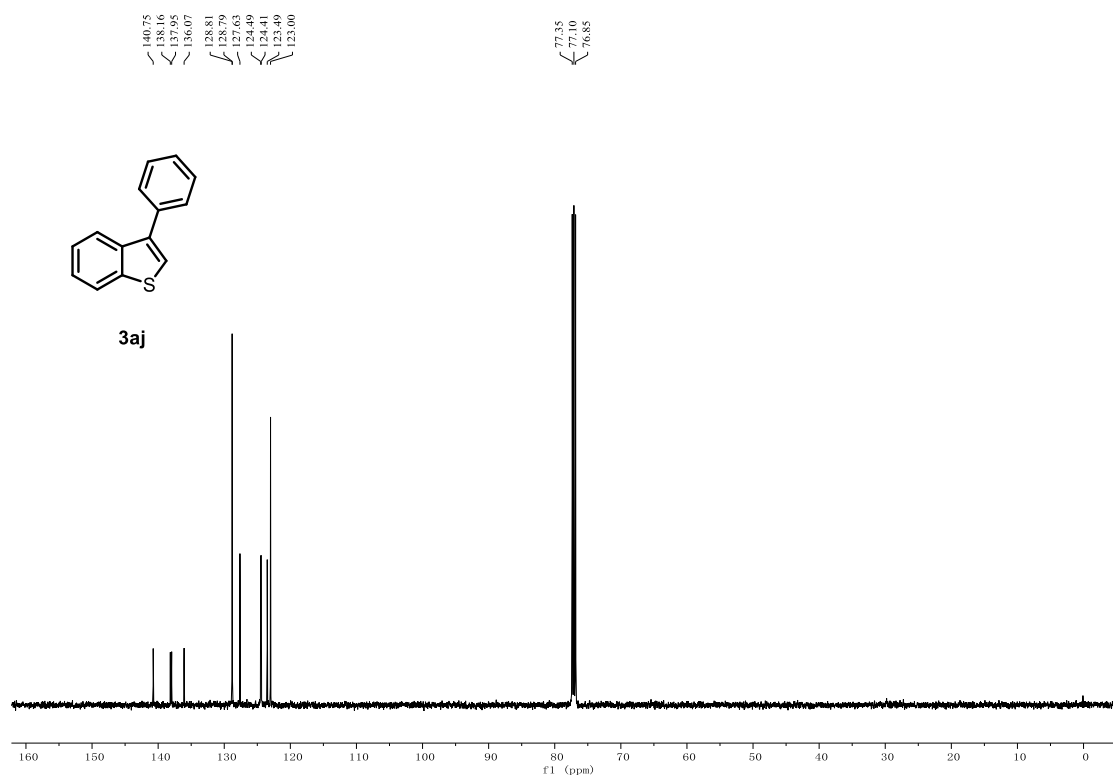



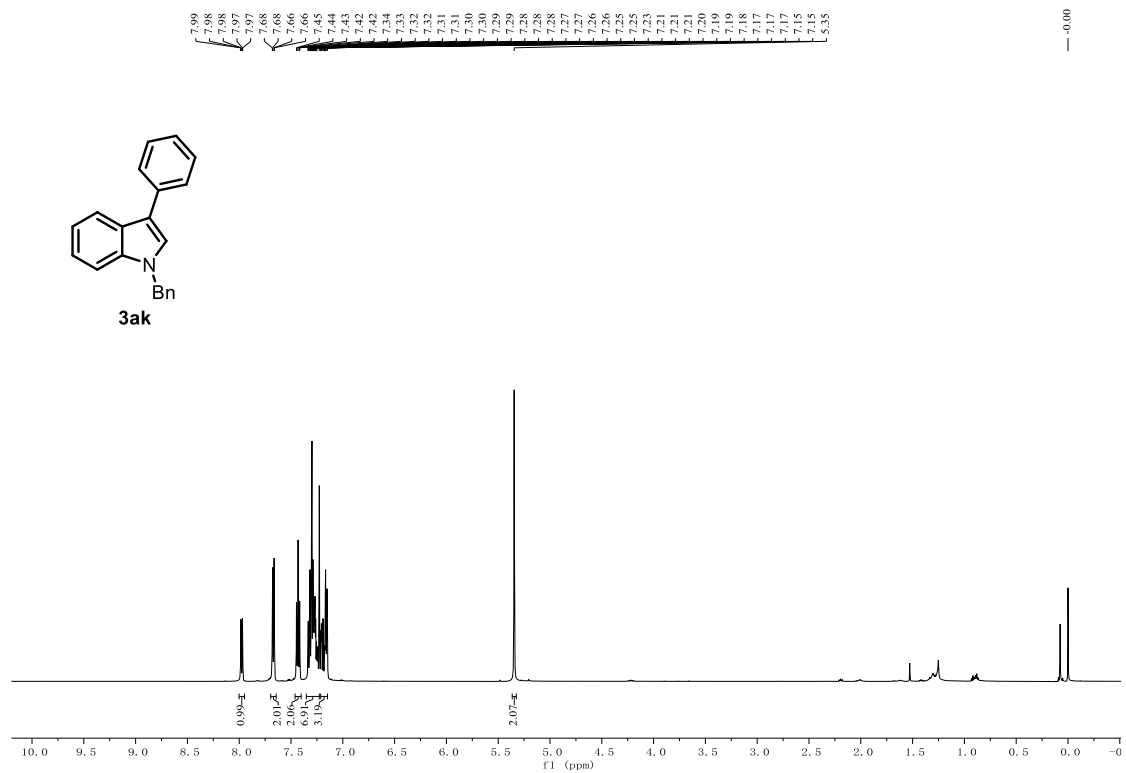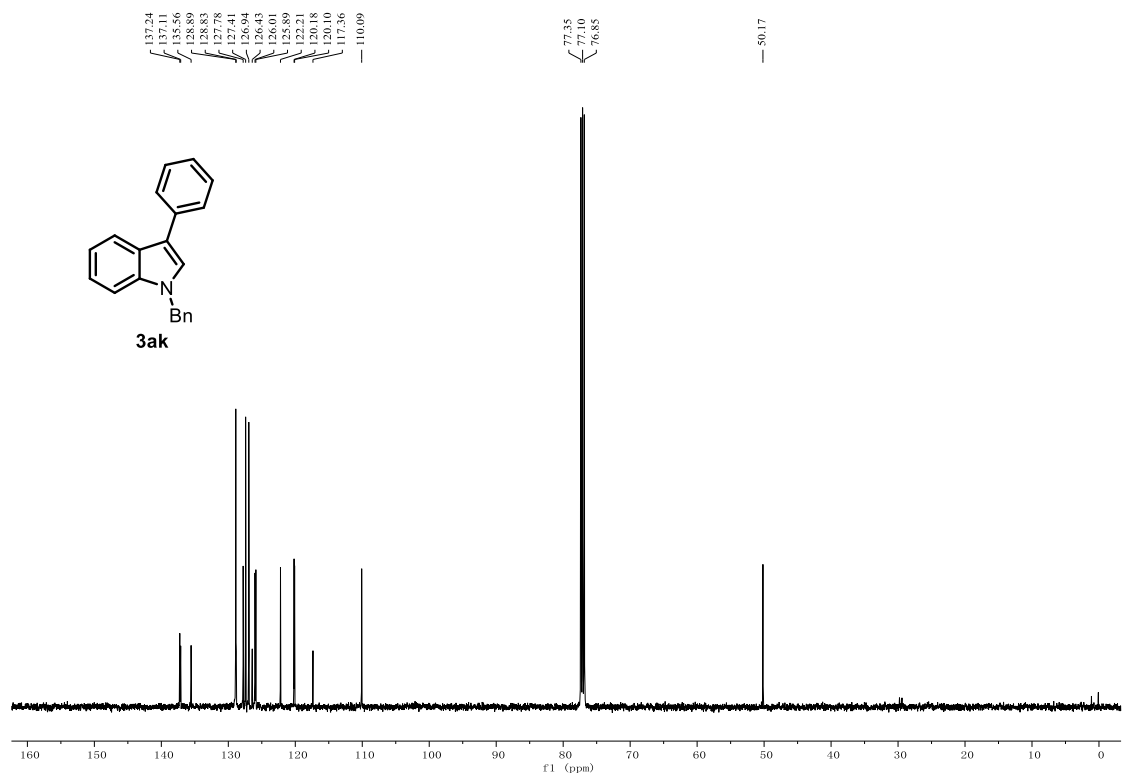

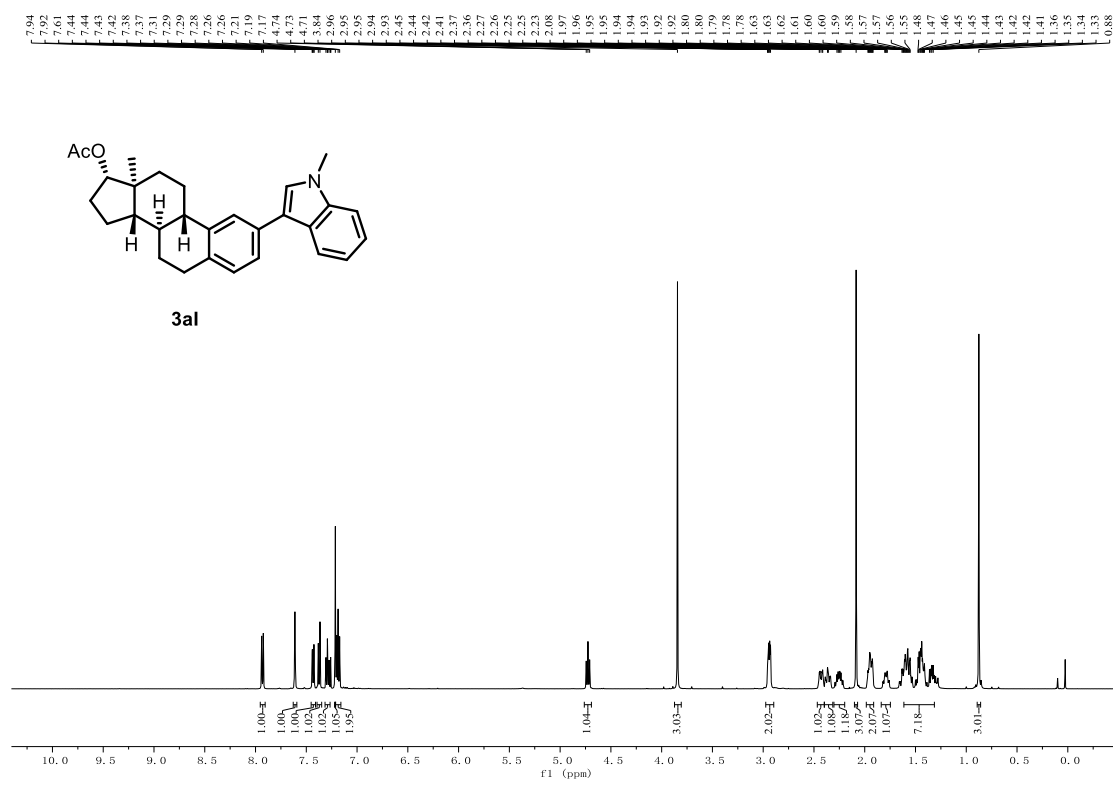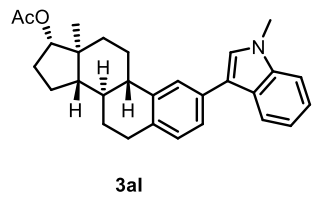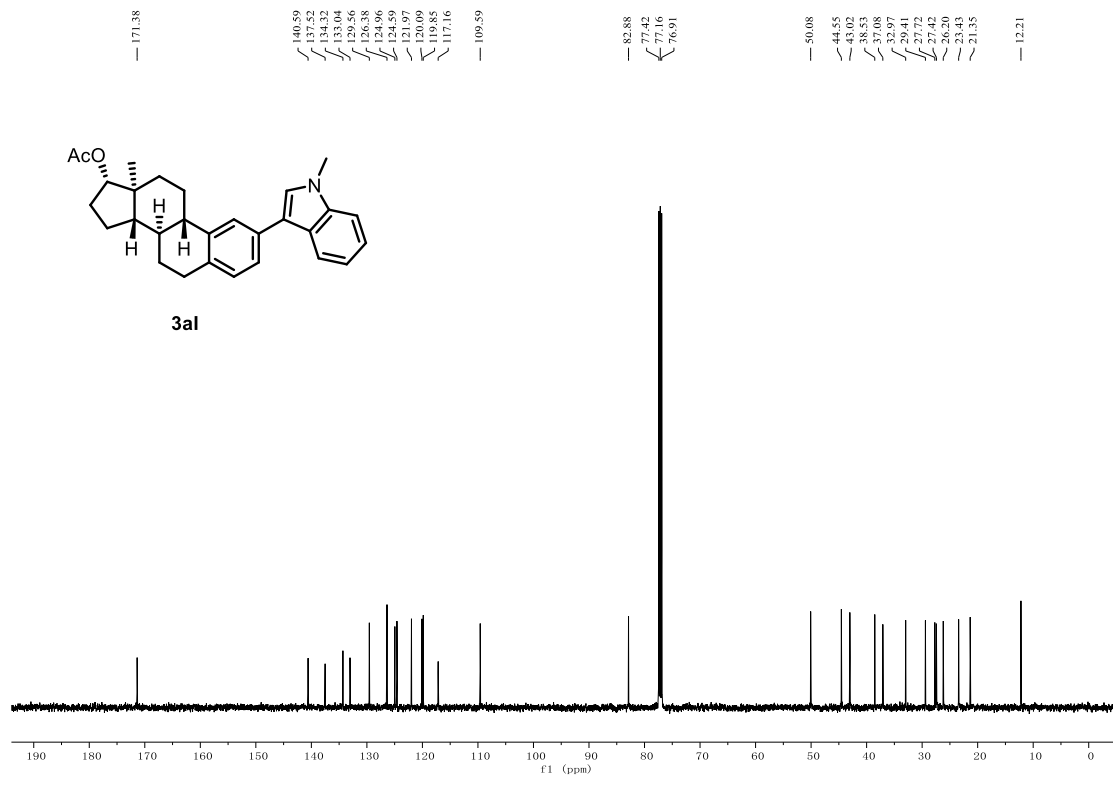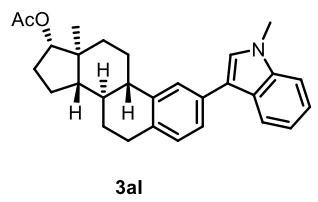

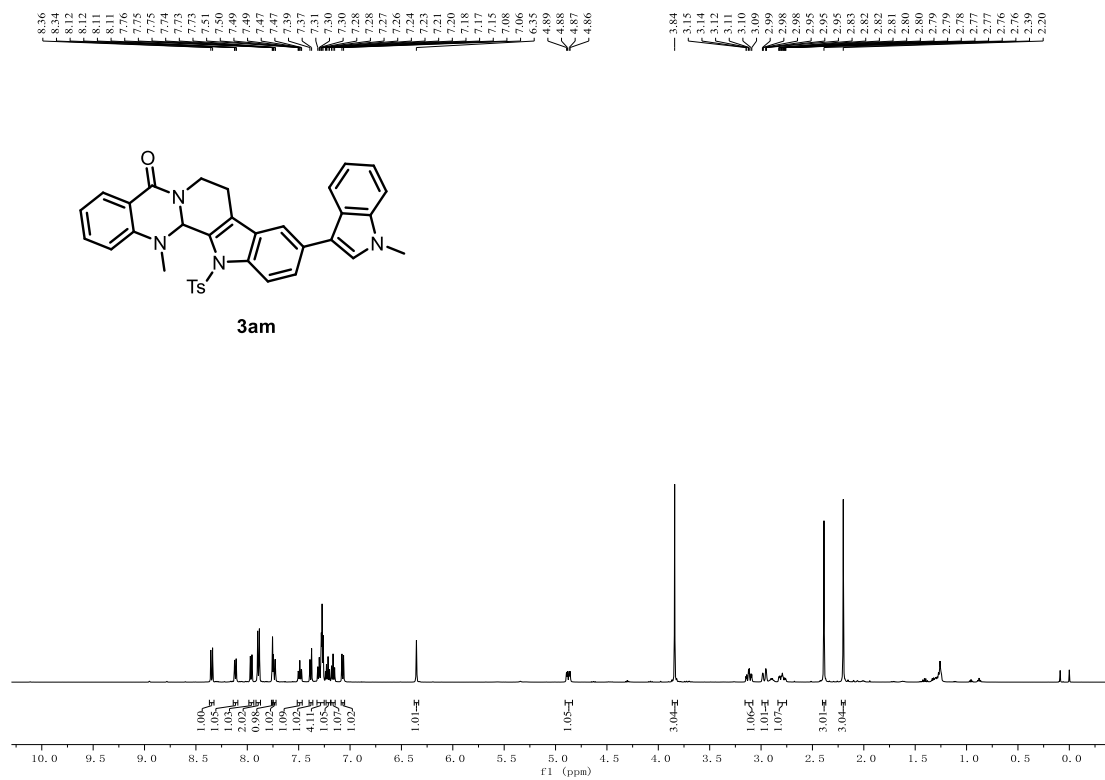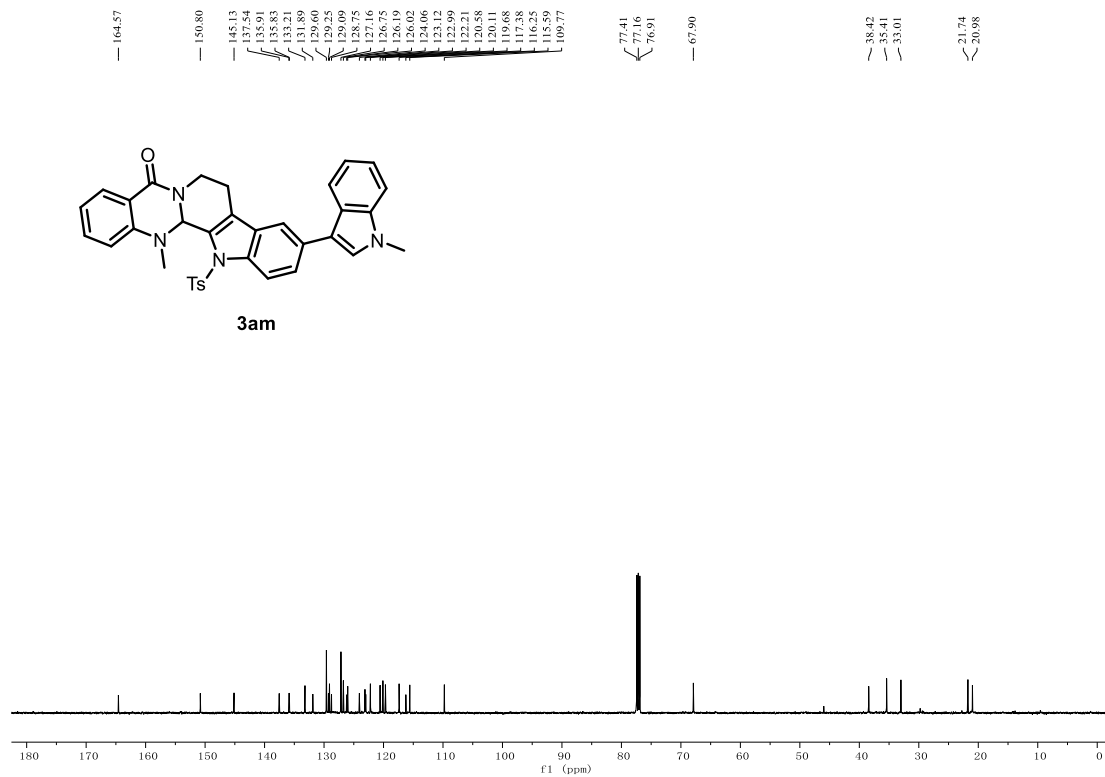

7.33  
7.31  
7.30  
7.26  
7.25  
7.22  
7.20  
7.18

2.80  
2.78  
2.77  
2.34  
2.32  
2.31  
2.02  
2.00  
1.99  
1.96

— 0.00

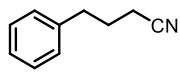

4

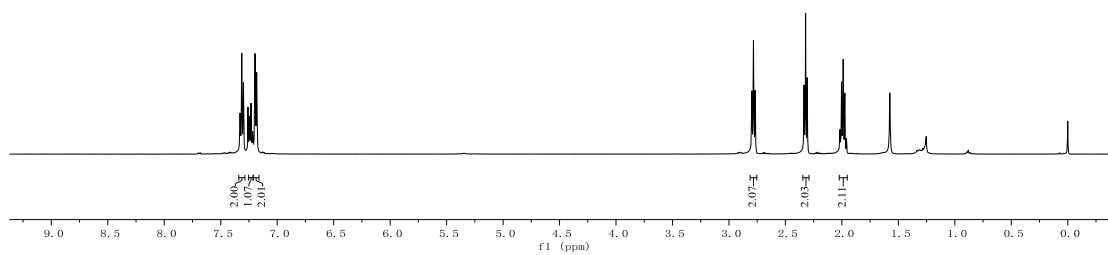

Supplement: d1cc03954g1.pdf [file d1cc03954g1.pdf]
